# Supplementary material for: Extended BODIPYs as Red–NIR Laser Radiation Sources with Emission from 610 nm to 750 nm
Source: MDPI journal article supplement (doi:10.3390/molecules28124750), 2023-06-13

# Extended BODIPYs as Red–NIR Laser Radiation Sources with Emission from 610 nm to 750 nm

Ainhoa Oliden-Sánchez <sup>1</sup>, Enrique Alvarado-Martínez <sup>2</sup>, Diana E. Ramírez-Ornelas <sup>2</sup>,  
Miguel A. Vázquez <sup>2</sup>, Edurne Avellanal-Zaballa <sup>1</sup>, Jorge Bañuelos <sup>1,\*</sup> and  
Eduardo Peña-Cabrera <sup>2,\*</sup>

<sup>1</sup> Departamento de Química Física, Universidad del País Vasco (UPV/EHU),  
Barrio Sarriena s/n, Aptado 644, 48940 Leioa, Bizkaia, Spain;  
ainhoa.oliden@ehu.es (A.O.-S.); edurne.avellanal@ehu.es (E.A.-Z.)

<sup>2</sup> Departamento de Química, Universidad de Guanajuato, Noria Alta s/n,  
Guanajuato 36050, Guanajuato, Mexico; e.alvaradomartinez@ugto.mx (E.A.-M.);  
ramirez.de@ugto.mx (D.E.R.-O.); mvazquez@ugto.mx (M.A.V.)

\* Correspondence: jorge.banuelos@ehu.es (J.B.); eduardop@ugto.mx (E.P.-C.)

## Table of contents

|                                                        |     |
|--------------------------------------------------------|-----|
| 1. Synthesis and characterization (Table S1)           | S2  |
| 2. References                                          | S12 |
| 3. Photophysical data (Tables S2-S5)                   | S13 |
| 4. Absorption and fluorescence spectra (Figures S1-S2) | S17 |
| 5. Laser set up (Scheme S1)                            | S18 |
| 6. <sup>1</sup> H NMR and <sup>13</sup> C NMR spectra  | S19 |

## 1. Synthesis and characterization

### Synthesis of 2,3,5,6 tetrabromo-8-methylthioBODIPY 2 [S1].

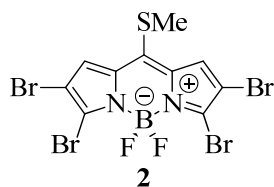

A round-bottom flask equipped with a stir bar, 8-methylthioBODIPY 1 (50.0 mg, 0.2100 mmol, 1.0 equiv.) was dissolved in acetic acid (7.0 mL) and NBS (187.0 mg, 1.0501 mmol, 5.0 equiv.) was added to the solution, and the reaction mixture was stirred at room temperature for 12 h. After TLC showed that the reaction went to completion, the mixture was poured into water (50.0 mL) and the pH was adjusted using saturated  $\text{Na}_2\text{CO}_3$  to pH 7. The product was extracted with ethyl acetate, washed with brine, dried over anhyd.  $\text{MgSO}_4$ , and filtered. The solvents were removed under reduced pressure. The reaction mixture was adsorbed on  $\text{SiO}_2$ -gel and the solvent was evaporated on a rotary evaporator under vacuum. After flash-chromatography ( $\text{SiO}_2$ -gel, EtOAc/hexanes gradient) purification, 8-methylthio-2,3,5,6-tetra-bromoBODIPY was obtained as a red solid (58.0 mg, 50%);  $^1\text{H}$  NMR (500 MHz,  $\text{CDCl}_3$ ):  $\delta$  7.45 (s, 2H), 2.83 (s, 3H).

### Synthesis of 8-aryl-2,3,5,6-tetrabromoBODIPYs 3a-3e.

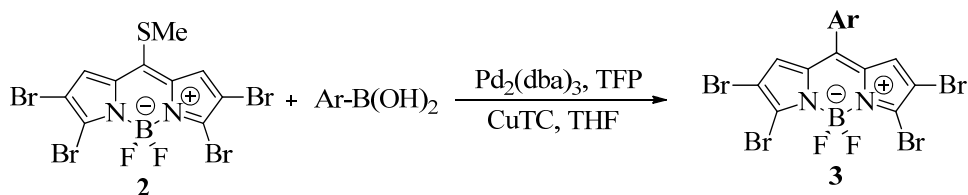

### Synthesis of BODIPY 3a [S2].

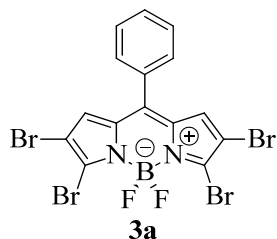

According to TP1. 2 (55.4 mg, 0.1 mmol, 1.0 equiv), phenylboronic acid (36.6 mg, 0.3 mmol, 3.0 equiv), CuTC (57.2 mg, 0.3 mmol, 3.0 equiv),  $\text{Pd}_2(\text{dba})_3$  (2.3 mg,  $2.5 \times 10^{-3}$  mmol, 2.5 mol%), and tri-2-furylphosphine (1.8 mg,  $7.5 \times 10^{-3}$  mmol, 7.5 mol%) for 2 h were reacted. Flash chromatography on silica gel afforded the desired product 3a as a red solid (10.5 mg, 18% yield);  $^1\text{H}$  NMR (500 MHz,

CDCl<sub>3</sub>):  $\delta$  7.65-7.47 (m, 5H), 6.90 (s, 2H); <sup>13</sup>C NMR (126 MHz, CDCl<sub>3</sub>):  $\delta$  142.9, 135.4, 135.0, 131.9, 131.7, 131.6, 130.5, 129.1, 112.2.

#### Synthesis of BODIPY 3b [S3].

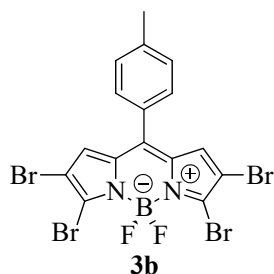

According to TP1. **2** (55.4 mg, 0.1 mmol, 1.0 equiv), *p*-tolylboronic acid (40.8 mg, 0.3 mmol, 3.0 equiv), CuTC (57.2 mg, 0.3 mmol, 3.0 equiv), Pd<sub>2</sub>(dba)<sub>3</sub> (2.3 mg, 2.5 × 10<sup>-3</sup> mmol, 2.5 mol%), and tri-2-furylphosphine (1.8 mg, 7.5 × 10<sup>-3</sup> mmol, 7.5 mol%) for 2 h were reacted. Flash chromatography on silica gel afforded the desired product **3b** as a purple solid (28.7 mg, 48% yield); <sup>1</sup>H NMR (500 MHz, CDCl<sub>3</sub>):  $\delta$  7.38-7.32 (m, 4H), 6.82 (s, 2H), 2.46 (s, 3H); <sup>13</sup>C NMR (126 MHz, CDCl<sub>3</sub>):  $\delta$  142.6, 134.9, 134.8, 131.7, 130.7, 130.6, 129.8, 129.1, 112.0, 21.7.

#### Synthesis of BODIPY 3c [1].

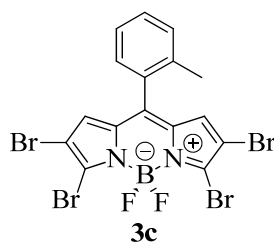

According to TP1. **2** (55.4 mg, 0.1 mmol, 1.0 equiv), *o*-tolylboronic acid (40.8 mg, 0.3 mmol, 3.0 equiv), CuTC (57.2 mg, 0.3 mmol, 3.0 equiv), Pd<sub>2</sub>(dba)<sub>3</sub> (2.3 mg, 2.5 × 10<sup>-3</sup> mmol, 2.5 mol%), and tri-2-furylphosphine (1.8 mg, 7.5 × 10<sup>-3</sup> mmol, 7.5 mol%) for 1 h were reacted. Flash chromatography on silica gel afforded the desired product **3c** as a purple solid (45.4 mg, 76% yield); <sup>1</sup>H NMR (500 MHz, CDCl<sub>3</sub>):  $\delta$  7.45 (td, *J* = 7.6, *J* = 1.3 Hz, 1H), 7.34-7.29 (m, 2H), 7.21 (dd, *J* = 7.6, *J* = 1.0 Hz, 1H), 6.68 (s, 2H), 2.23 (s, 3H); <sup>13</sup>C NMR (126 MHz, CDCl<sub>3</sub>):  $\delta$  142.5, 136.6, 135.7, 135.4, 131.1, 131.0, 130.9, 130.6, 129.9, 125.9, 112.3, 20.2.

### Synthesis of BODIPY 3d [S2].

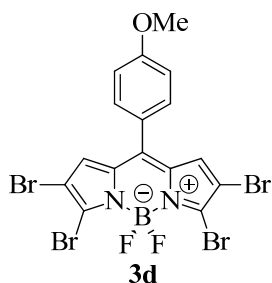

According to TP1. **2** (55.4 mg, 0.1 mmol, 1.0 equiv), *p*-methoxyphenylboronic acid (45.6 mg, 0.3 mmol, 3.0 equiv), CuTC (57.2 mg, 0.3 mmol, 3.0 equiv), Pd<sub>2</sub>(dba)<sub>3</sub> (2.3 mg, 2.5 × 10<sup>-3</sup> mmol, 2.5 mol%), and tri-2-furylphosphine (1.8 mg, 7.5 × 10<sup>-3</sup> mmol, 7.5 mol%) for 40 min were reacted. Flash chromatography on silica gel afforded the desired product **3d** as a purple solid (38.7 mg, 63% yield); <sup>1</sup>H NMR (500 MHz, CDCl<sub>3</sub>): δ 7.46 (d, *J* = 8.8 Hz, 2H), 7.06 (d, *J* = 8.8 Hz, 2H), 6.95 (s, 2H), 3.92 (s, 3H); <sup>13</sup>C NMR (126 MHz, CDCl<sub>3</sub>): δ 161.7, 142.0, 133.7, 133.1, 131.3, 130.4, 123.1, 113.6, 110.7, 54.6.

### Synthesis of BODIPY 3e [S1].

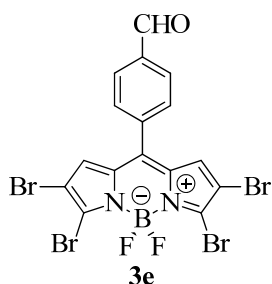

According to TP1. **2** (55.4 mg, 0.1 mmol, 1.0 equiv), *p*-formylphenylboronic acid (45.0 mg, 0.3 mmol, 3.0 equiv), CuTC (57.2 mg, 0.3 mmol, 3.0 equiv), Pd<sub>2</sub>(dba)<sub>3</sub> (2.3 mg, 2.5 × 10<sup>-3</sup> mmol, 2.5 mol%), and tri-2-furylphosphine (1.8 mg, 7.5 × 10<sup>-3</sup> mmol, 7.5 mol%) for 1 h were reacted. Flash chromatography on silica gel afforded the desired product **3e** as a purple solid (23.1 mg, 38% yield); <sup>1</sup>H NMR (500 MHz, CDCl<sub>3</sub>): δ 10.15 (s, 1H), 8.06 (d, *J* = 8.0 Hz, 2H), 7.66 (d, *J* = 8.0 Hz, 2H), 6.85 (s, 2H); <sup>13</sup>C NMR (126 MHz, CDCl<sub>3</sub>): δ 191.0, 140.5, 138.2, 137.3, 136.6, 134.7, 131.3, 131.0, 130.0, 112.8.

### Synthesis of the 8-aryl-2,3,5,6-tetra-(het)arylBODIPYs 4a-4l.

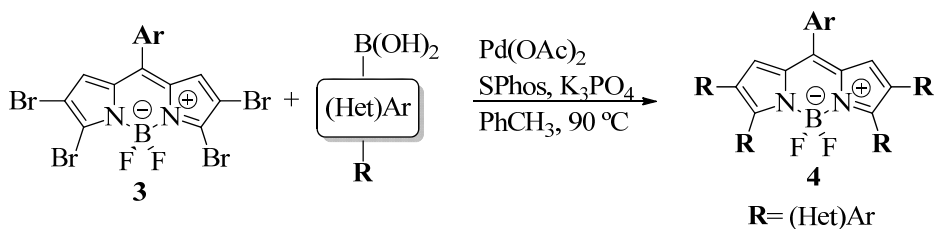

#### Synthesis of BODIPY 4a [S4].

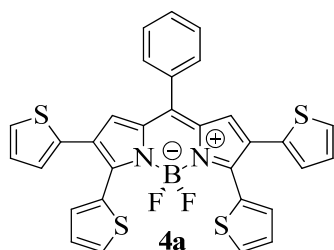

According to TP2. **3a** (58.4 mg, 0.1 mmol, 1.0 equiv.), 2-thienylboronic acid (102.4 mg, 0.8 mmol, 8.0 equiv.), Pd(OAc)<sub>2</sub> (2.2 mg, 10 × 10<sup>-3</sup> mmol, 10.0 mol%), SPhos (9.0 mg, 22.0 × 10<sup>-3</sup> mmol, 22.0 mol%), and K<sub>3</sub>PO<sub>4</sub> (339.6 mg, 1.6 mmol, 16.0 equiv.) for 20 min were reacted. Flash chromatography on silica gel afforded the desired product **4a** as a dark green solid (47.7 mg, 80% yield); <sup>1</sup>H NMR (500 MHz, CDCl<sub>3</sub>): δ 7.64-7.55 (m, 7H), 7.50 (d, *J* = 5.0 Hz, 2H), 7.20 (d, *J* = 4.6 Hz, 2H), 7.10 (dd, *J* = 5.0 Hz, *J* = 3.7 Hz, 2H), 6.95 (s, 2H), 6.92 (dd, *J* = 5.1 Hz, *J* = 3.6 Hz, 2H), 6.76 (d, *J* = 3.1 Hz, 2H); <sup>13</sup>C NMR (126 MHz, CDCl<sub>3</sub>): δ 149.1, 143.4, 135.2, 135.1, 133.9, 132.3 (t, *J* = 3.7 Hz), 130.9, 130.6, 130.5, 129.7, 129.0 (dd, *J* = 2.3 Hz, *J* = 4.6 Hz), 128.6, 128.1, 127.2 (d, *J* = 2.5 Hz), 126.3, 125.6.

#### Synthesis of BODIPY 4b [S5].

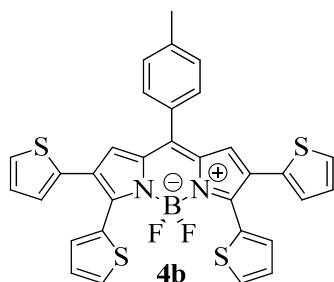

According to TP2. **3b** (59.7 mg, 0.1 mmol, 1.0 equiv.), 2-thienylboronic acid (102.4 mg, 0.8 mmol, 8.0 equiv.), Pd(OAc)<sub>2</sub> (2.2 mg, 10 × 10<sup>-3</sup> mmol, 10.0 mol%), SPhos (9.0 mg, 22.0 × 10<sup>-3</sup> mmol, 22.0 mol%), and K<sub>3</sub>PO<sub>4</sub> (339.6 mg, 1.6 mmol, 16.0 equiv.) for 20 min were reacted. Flash chromatography on silica gel afforded the desired product **4b** as a dark green solid (50.7 mg, 83% yield); <sup>1</sup>H NMR (500 MHz, CDCl<sub>3</sub>): δ 7.55-7.53 (m, 4H), 7.49 (dd, *J* = 5.1 Hz, *J* = 1.1 Hz, 2H), 7.38 (d, *J* = 7.8 Hz, 2H), 7.20 (dd, *J* = 5.1 Hz, *J* = 1.1 Hz, 2H), 7.10 (dd, *J* = 5.0 Hz, *J* = 3.7 Hz, 2H), 6.98 (s, 2H), 6.91 (dd, *J* = 5.1 Hz, 3.7 Hz, 2H), 6.76 (dd, *J* = 3.6 Hz, *J* = 1.1 Hz, 2H), 2.51 (s, 3H); <sup>13</sup>C NMR (126 MHz, CDCl<sub>3</sub>): δ 148.9, 144.0, 141.2, 135.4, 135.2, 132.4 (t, *J* = 3.4 Hz), 131.2, 131.1, 130.8, 129.7, 129.5, 129.1 (t, *J* = 4.3 Hz), 128.2, 127.4, 126.4, 125.6, 21.7.

### Synthesis of BODIPY 4c.

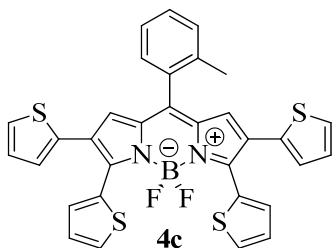

According to TP2. **3c** (59.7 mg, 0.1 mmol, 1.0 equiv.), 2-thienylboronic acid (102.4 mg, 0.8 mmol, 8.0 equiv.), Pd(OAc)<sub>2</sub> (2.2 mg, 10 × 10<sup>-3</sup> mmol, 10.0 mol%), SPhos (9.0 mg, 22.0 × 10<sup>-3</sup> mmol, 22.0 mol%), and K<sub>3</sub>PO<sub>4</sub> (339.6 mg, 1.6 mmol, 16.0 equiv.) for 20 min were reacted. Flash chromatography on silica gel afforded the desired product **4c** as a dark green solid (39.6 mg, 65% yield); TLC (15% EtOAc/hexanes, R<sub>f</sub> = 0.4); mp > 260 °C; IR (KBr, cm<sup>-1</sup>): 3103 (w), 2918 (w), 1546 (s), 1429 (m), 1351 (w), 1273 (w), 1235 (s), 1226 (s), 1210 (s), 1177 (s), 1119 (m), 987 (m), 888 (w), 836 (m), 820 (m); <sup>1</sup>H NMR (500 MHz, CDCl<sub>3</sub>): δ 7.56 (dd, *J* = 3.6 Hz, *J* = 0.8 Hz, 2H), 7.51 (dd, *J* = 5.0 Hz, *J* = 1.1 Hz, 2H), 7.47 (td, *J* = 7.5 Hz, *J* = 1.7 Hz, 2H), 7.40-7.34 (m, 3H), 7.19 (dd, *J* = 5.1 Hz, *J* = 1.1 Hz, 2H), 7.11 (dd, *J* = 5.0 Hz, *J* = 3.7 Hz, 1H), 6.90 (dd, *J* = 5.1 Hz, *J* = 3.6 Hz, 2H), 6.74 (dd, *J* = 3.6 Hz, *J* = 1.1 Hz, 2H), 6.72 (s, 2H), 2.38 (s, 3H); <sup>13</sup>C NMR (126 MHz, CDCl<sub>3</sub>): δ 149.4, 143.0, 136.9, 135.6, 135.3, 133.2, 132.5 (t, *J* = 3.6 Hz), 131.1, 130.7, 130.3, 129.9, 129.8, 129.2 (dd, *J* = 4.5 Hz, *J* = 2.2 Hz), 127.5, 127.4, 127.3, 126.5, 125.7, 125.6, 20.5; HRMS (ESI<sup>+</sup>) *m/z* calcd for C<sub>32</sub>H<sub>22</sub>BF<sub>2</sub>N<sub>2</sub>S<sub>4</sub> [M + H]<sup>+</sup> 611.0682, found 611.0690.

### Synthesis of BODIPY 4d.

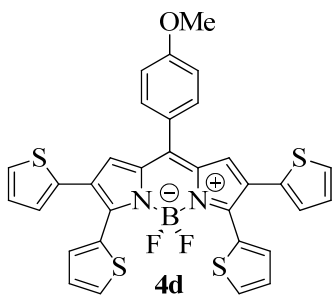

According to TP2. **3d** (61.4 mg, 0.1 mmol, 1.0 equiv.), 2-thienylboronic acid (102.4 mg, 0.8 mmol, 8.0 equiv.), Pd(OAc)<sub>2</sub> (2.2 mg, 10 × 10<sup>-3</sup> mmol, 10.0 mol%), SPhos (9.0 mg, 22.0 × 10<sup>-3</sup> mmol, 22.0 mol%), and K<sub>3</sub>PO<sub>4</sub> (339.6 mg, 1.6 mmol, 16.0 equiv.) for 25 min were reacted. Flash chromatography on silica gel afforded the desired product **4d** as a dark green solid (47.6 mg, 76% yield); TLC (30% EtOAc/hexanes, R<sub>f</sub> = 0.6); mp > 260 °C; IR (KBr, cm<sup>-1</sup>): 2920 (w), 1712 (w), 1603 (m), 1573 (w), 1541 (s), 1453 (m), 1395 (m), 1298 (w), 1238 (s), 1176 (s), 1089 (s), 1075 (s), 987 (m), 852 (w), 769 (w), 697 (m); <sup>1</sup>H NMR (500 MHz, CDCl<sub>3</sub>): δ 7.62-7.59 (m, 2H), 7.52 (dd, *J* = 3.6 Hz, *J* = 0.8 Hz, 2H), 7.49 (dd, *J* = 5.1 Hz,

$J = 1.1$  Hz, 2H), 7.20 (dd,  $J = 5.1$  Hz,  $J = 1.1$  Hz, 2H), 7.11-7.09 (m, 2H), 7.00 (s, 2H), 6.92 (dd,  $J = 5.1$  Hz,  $J = 3.6$  Hz, 2H), 6.76 (dd,  $J = 3.6$  Hz,  $J = 1.1$  Hz, 2H), 3.94 (s, 3H);  $^{13}\text{C}$  NMR (126 MHz,  $\text{CDCl}_3$ ):  $\delta$  162.0, 148.6, 143.8, 135.5, 135.1, 132.5, 132.3 (t,  $J = 3.6$  Hz), 131.2, 129.7, 129.0 (t,  $J = 2.6$  Hz), 128.1, 127.4 (d,  $J = 1.8$  Hz), 126.5, 126.3, 125.6, 114.3, 55.7; HRMS ( $\text{ESI}^+$ )  $m/z$  calcd for  $\text{C}_{32}\text{H}_{21}\text{BF}_2\text{N}_2\text{OS}_4\text{K}$  [ $\text{M} + \text{K}$ ] $^+$  665.0235, found 665.0250.

#### Synthesis of BODIPY 4e.

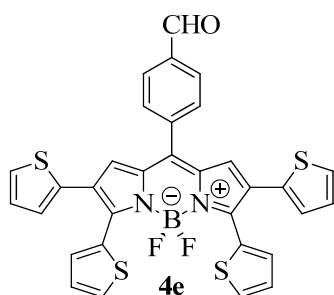

According to TP2. **3e** (61.7 mg, 0.1 mmol, 1.0 equiv.), 2-thienylboronic acid (102.4 mg, 0.8 mmol, 8.0 equiv.),  $\text{Pd}(\text{OAc})_2$  (2.2 mg,  $10 \times 10^{-3}$  mmol, 10.0 mol%), SPhos (9.0 mg,  $22.0 \times 10^{-3}$  mmol, 22.0 mol%), and  $\text{K}_3\text{PO}_4$  (339.6 mg, 1.6 mmol, 16.0 equiv.) for 2 h were reacted. Flash chromatography on silica gel afforded the desired product **4e** as a dark green solid (34.4 mg, 55% yield); TLC (40% EtOAc/hexanes,  $R_f = 0.6$ ); mp > 260  $^\circ\text{C}$ ; IR (KBr,  $\text{cm}^{-1}$ ): 3103 (w), 2918 (w), 1546 (s), 1429 (m), 1351 (w), 1273 (w), 1235 (s), 1226 (s), 1210 (s), 1177 (s), 1119 (m), 987 (m), 888 (w), 836 (m), 820 (m);  $^1\text{H}$  NMR (500 MHz,  $\text{CDCl}_3$ ):  $\delta$  10.17 (s, 1H), 8.10 (d,  $J = 8.3$  Hz, 2H), 7.81 (d,  $J = 8.1$  Hz, 2H), 7.57 (dd,  $J = 3.6$  Hz,  $J = 0.9$  Hz, 2H), 7.52 (dd,  $J = 5.0$  Hz,  $J = 1.2$  Hz, 2H), 7.22 (dd,  $J = 5.1$  Hz,  $J = 1.1$  Hz, 2H), 7.11 (dd,  $J = 5.0$  Hz,  $J = 3.7$  Hz, 2H), 6.92 (dd,  $J = 5.1$  Hz,  $J = 3.6$  Hz, 2H), 6.87 (s, 2H), 6.76 (dd,  $J = 3.6$  Hz,  $J = 1.1$  Hz, 2H);  $^{13}\text{C}$  NMR (126 MHz,  $\text{CDCl}_3$ ):  $\delta$  191.5, 150.1, 141.0, 139.8, 137.6, 135.0, 134.9, 132.7 (t, 3.7 Hz), 131.3, 130.9, 130.2, 129.8, 129.7, 127.7, 127.5 (d,  $J = 3.9$  Hz), 126.7, 126.0; HRMS ( $\text{ESI}^+$ )  $m/z$  calcd for  $\text{C}_{32}\text{H}_{19}\text{BF}_2\text{N}_2\text{OS}_4\text{K}$  [ $\text{M} + \text{K}$ ] $^+$  663.0079, found 663.0095.

#### Synthesis of BODIPY 4f [S2].

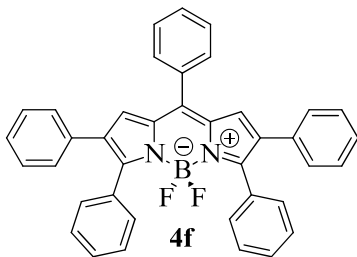

According to TP2. **3a** (58.4 mg, 0.1 mmol, 1.0 equiv.), phenylboronic acid (97.5 mg, 0.8 mmol, 8.0 equiv.),  $\text{Pd}(\text{OAc})_2$  (2.2 mg,  $10 \times 10^{-3}$  mmol, 10.0 mol%), SPhos (9.0 mg,  $22.0 \times 10^{-3}$  mmol, 22.0 mol%),

and  $\text{K}_3\text{PO}_4$  (339.6 mg, 1.6 mmol, 16.0 equiv.) for 4 h were reacted. Flash chromatography on silica gel afforded the desired product **4f** as a purple solid (29.8 mg, 52% yield);  $^1\text{H}$  NMR (500 MHz,  $\text{CDCl}_3$ ):  $\delta$  7.72-7.68 (m, 2H), 7.64-7.55 (m, 3H), 7.48 (d,  $J$  = 6.9 Hz, 4H), 7.38-7.29 (m, 6H), 7.17-7.13 (m, 6H), 7.03-6.98 (m, 6H);  $^{13}\text{C}$  NMR (126 MHz,  $\text{CDCl}_3$ ):  $\delta$  156.4, 143.8, 134.6, 134.3, 133.7, 131.6, 130.6, 130.3, 129.0, 128.5, 128.3, 128.2, 128.0, 127.7, 126.8, 125.4, 116.8.

#### Synthesis of BODIPY **4g** [S3].

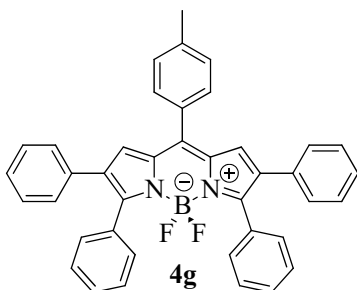

According to TP2. **3b** (59.8 mg, 0.1 mmol, 1.0 equiv.), phenylboronic acid (97.5 mg, 0.8 mmol, 8.0 equiv.),  $\text{Pd}(\text{OAc})_2$  (2.2 mg,  $10 \times 10^{-3}$  mmol, 10.0 mol%), SPhos (9.0 mg,  $22.0 \times 10^{-3}$  mmol, 22.0 mol%), and  $\text{K}_3\text{PO}_4$  (339.6 mg, 1.6 mmol, 16.0 equiv.) for 4 h were reacted. Flash chromatography on silica gel afforded the desired product **4g** as a purple solid (33.4 mg, 57% yield);  $^1\text{H}$  RMN (400 MHz,  $\text{CDCl}_3$ ):  $\delta$  7.59 (d,  $J$  = 7.93 Hz, 2 H), 7.45-7.49 (m, 4 H), 7.38 (d,  $J$  = 7.93 Hz, 2 H), 7.29-7.35 (m, 4 H), 7.13-7.17 (m, 6 H), 7.04 (s, 2 H), 6.98-7.02 (m, 4 H), 2.51 (s, 3 H);  $^{13}\text{C}$  RMN (101 MHz,  $\text{CDCl}_3$ ):  $\delta$  156.4, 144.5, 141.0, 134.8, 134.6, 134.0, 131.9, 131.7, 130.9, 130.5, 129.3, 129.2, 128.8, 128.4, 128.3, 128.0, 127.0, 21.6.

#### Synthesis of BODIPY **4h**.

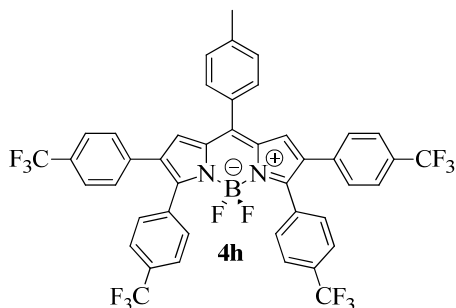

According to TP2. **3b** (59.8 mg, 0.1 mmol, 1.0 equiv.), *p*-(trifluoromethyl)phenyl boronic acid (151.9 mg, 0.8 mmol, 8.0 equiv.),  $\text{Pd}(\text{OAc})_2$  (2.2 mg,  $10 \times 10^{-3}$  mmol, 10.0 mol%), SPhos (9.0 mg,  $22.0 \times 10^{-3}$  mmol, 22.0 mol%), and  $\text{K}_3\text{PO}_4$  (339.6 mg, 1.6 mmol, 16.0 equiv.) for 5 h were reacted. Flash chromatography on silica gel afforded the desired product **4h** as a purple solid (35.2 mg, 41% yield); TLC (5% EtOAc/hexanes,  $R_f$  = 0.5); mp > 260 °C; IR (KBr,  $\text{cm}^{-1}$ ): 2927 (w), 2852 (w), 2640 (w), 1618 (m), 1573 (s), 1563 (s), 1444 (w), 1411 (w), 1327 (s), 1275 (m), 1232 (s), 1214 (s), 1159 (s), 1117 (s), 1058 (s),



1014 (s), 999 (m), 843 (m), 834 (m), 697 (w);  $^1\text{H}$  NMR (500 MHz,  $\text{CDCl}_3$ ):  $\delta$  7.63-7.57 (m, 10H), 7.45-7.42 (m, 6H), 7.14 (s, 2H), 7.10 (d,  $J$  = 8.1 Hz, 4 H);  $^{13}\text{C}$  NMR (126 MHz,  $\text{CDCl}_3$ ):  $\delta$  154.9, 146.8, 142.0, 135.2, 134.8, 133.6, 131.6, 131.4, 131.1, 131.0, 130.9 (d,  $J$  = 4.8 Hz), 130.0, 129.7, 129.6, 129.4, 128.6, 125.6 (d,  $J$  = 3.4 Hz), 125.3 (d,  $J$  = 3.4 Hz), 125.2, 125.1, 123.1, 122.9, 21.7; HRMS ( $\text{ESI}^+$ )  $m/z$  calcd for  $\text{C}_{44}\text{H}_{26}\text{BF}_{14}\text{N}_2$   $[\text{M} + \text{H}]^+$  859.1921, found 859.1910.

#### Synthesis of BODIPY 4i

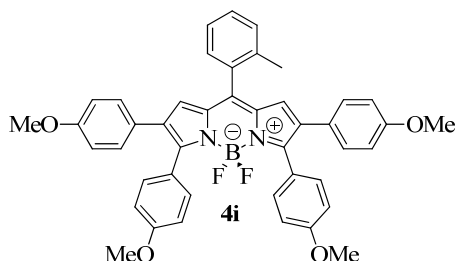

According to TP2. **3c** (59.8 mg, 0.1 mmol, 1.0 equiv.), *p*-methoxyphenylboronic acid (121.6 mg, 0.8 mmol, 8.0 equiv.),  $\text{Pd}(\text{OAc})_2$  (2.2 mg,  $10 \times 10^{-3}$  mmol, 10.0 mol%), SPhos (9.0 mg,  $22.0 \times 10^{-3}$  mmol, 22.0 mol%), and  $\text{K}_3\text{PO}_4$  (339.6 mg, 1.6 mmol, 16.0 equiv.) for 2 h were reacted. Flash chromatography on silica gel afforded the desired product **4i** as a purple solid (46.0 mg, 65% yield); TLC (60% EtOAc/hexanes,  $R_f$  = 0.6); mp > 260 °C; IR (KBr,  $\text{cm}^{-1}$ ): 3015 (m), 1602 (s), 1542 (s), 1411 (s), 1388 (s), 1259 (s), 1120 (s), 1077 (s);  $^1\text{H}$  NMR (500 MHz,  $\text{CDCl}_3$ ):  $\delta$  7.46-7.41 (m, 6H), 7.37-7.32 (m, 2H), 6.92 (d,  $J$  = 8.8 Hz, 4H), 6.85 (d,  $J$  = 8.8 Hz, 4H), 6.69 (d,  $J$  = 8.8 Hz, 4H), 6.66 (s, 2H), 3.81 (s, 6H), 3.74 (s, 6H), 2.40 (s, 3H);  $^{13}\text{C}$  NMR (126 MHz,  $\text{CDCl}_3$ ):  $\delta$  160.3, 158.7, 156.2, 141.7, 137.1, 135.0, 134.3, 134.0, 132.2, 130.5, 129.7, 129.4, 127.1, 126.8, 125.5, 124.4, 113.7, 113.6, 55.3, 55.3, 20.5; HRMS ( $\text{ESI}^+$ )  $m/z$  calcd for  $\text{C}_{44}\text{H}_{37}\text{BF}_2\text{N}_2\text{O}_4\text{K}$   $[\text{M} + \text{K}]^+$  745.2453, found 745.2460.

#### Synthesis of BODIPY 4j.

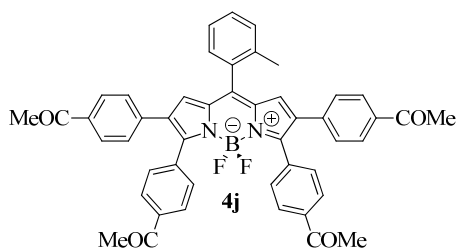

According to TP2. **3c** (59.8 mg, 0.1 mmol, 1.0 equiv.), *p*-acetylphenylboronic acid (131.2 mg, 0.8 mmol, 8.0 equiv.),  $\text{Pd}(\text{OAc})_2$  (2.2 mg,  $10 \times 10^{-3}$  mmol, 10.0 mol%), SPhos (9.0 mg,  $22.0 \times 10^{-3}$  mmol, 22.0 mol%), and  $\text{K}_3\text{PO}_4$  (339.6 mg, 1.6 mmol, 16.0 equiv.) for 14 h were reacted. Flash chromatography on silica gel afforded the desired product **4j** as a purple solid (34.0 mg, 45% yield); TLC (60% EtOAc/hexanes,  $R_f$  = 0.4); mp > 260 °C; IR (KBr,  $\text{cm}^{-1}$ ): 2921 (w), 1552 (s), 1498 (m), 1402 (w), 1324 (s), 1251 (m), 1331 (s),

1145 (s), 1019 (m), 932 (m), 880 (m);  $^1\text{H}$  NMR (500 MHz,  $\text{CDCl}_3$ ):  $\delta$  7.92 (d,  $J$  = 8.5 Hz, 4H), 7.74 (d,  $J$  = 8.5 Hz, 4H), 7.59 (d,  $J$  = 8.3 Hz, 4H), 7.52 (td,  $J$  = 7.5 Hz,  $J$  = 1.5 Hz, 1H), 7.46-7.39 (m, 3H), 7.06 (d,  $J$  = 8.5 Hz, 4H), 6.90 (s, 2H), 2.60 (s, 6H), 2.52 (s, 6H), 2.43 (s, 3H);  $^{13}\text{C}$  NMR (126 MHz,  $\text{CDCl}_3$ ):  $\delta$  197.8, 197.6, 155.9, 145.6, 138.0, 137.6, 136.8, 136.0, 135.9, 135.8, 134.1, 133.0, 130.9, 130.8, 130.3, 130.2, 128.9, 128.9, 128.6, 128.5, 128.2, 125.8, 26.8, 26.7, 20.6; HRMS (ESI $^+$ )  $m/z$  calcd for  $\text{C}_{48}\text{H}_{38}\text{BF}_2\text{N}_2\text{O}_4$  [ $\text{M} + \text{H}$ ] $^+$  755.2848, found 755.2838.

#### Synthesis of BODIPY 4k.

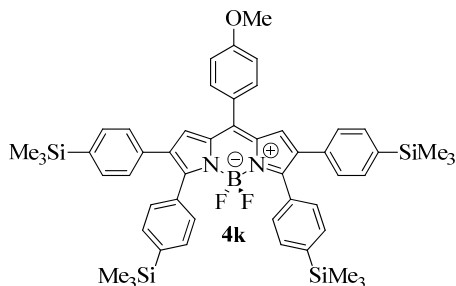

According to TP2. **3d** (61.4 mg, 0.1 mmol, 1.0 equiv.), *p*-(trimethylsilyl)phenylboronic acid (155.3 mg, 0.8 mmol, 8.0 equiv.),  $\text{Pd}(\text{OAc})_2$  (2.2 mg,  $10 \times 10^{-3}$  mmol, 10.0 mol%), SPhos (9.0 mg,  $22.0 \times 10^{-3}$  mmol, 22.0 mol%), and  $\text{K}_3\text{PO}_4$  (339.6 mg, 1.6 mmol, 16.0 equiv.) for 4 h were reacted. Flash chromatography on silica gel afforded the desired product **4k** as a purple solid (56.0 mg, 63% yield); TLC (5% EtOAc/hexanes,  $R_f$  = 0.5); mp > 260  $^\circ\text{C}$ ; IR (KBr,  $\text{cm}^{-1}$ ): 2966 (w), 1562 (s), 1488 (m), 1402 (w), 1324 (s), 1261 (m), 1131 (s), 1045 (s), 1009 (m), 982 (m), 850 (m);  $^1\text{H}$  NMR (500 MHz,  $\text{CDCl}_3$ ):  $\delta$  7.63 (d,  $J$  = 8.7 Hz, 2H), 7.46 (s, 8H), 7.30 (d,  $J$  = 8.1 Hz, 4H), 7.07 (d,  $J$  = 8.7 Hz, 2H), 7.06 (s, 2H), 6.98 (d,  $J$  = 8.1 Hz, 4H), 3.93 (s, 3H), 0.26 (s, 18H), 0.21 (s, 18H);  $^{13}\text{C}$  NMR (126 MHz,  $\text{CDCl}_3$ ):  $\delta$  161.8, 156.3, 143.9, 141.6, 139.0, 134.9, 134.6, 133.3, 132.9, 132.7, 132.3, 129.5, 128.9, 127.6, 127.0, 114.1, 55.7, -0.1, -1.00; HRMS (ESI $^+$ )  $m/z$  calcd for  $\text{C}_{52}\text{H}_{61}\text{BF}_2\text{N}_2\text{OSi}_4\text{K}$  [ $\text{M} + \text{K}$ ] $^+$  929.3563, found 929.3577.

#### Synthesis of BODIPY 4l.

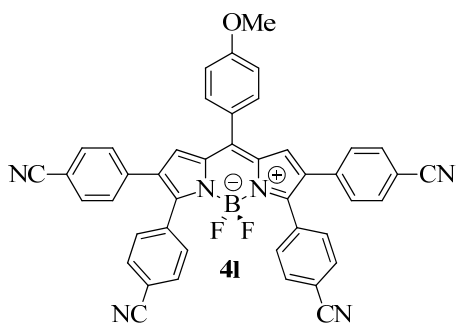

According to TP2. **3d** (61.4 mg, 0.1 mmol, 1.0 equiv.), *p*-cyanophenylboronic acid (117.6 mg, 0.8 mmol, 8.0 equiv.),  $\text{Pd}(\text{OAc})_2$  (2.2 mg,  $10 \times 10^{-3}$  mmol, 10.0 mol%), SPhos (9.0 mg,  $22.0 \times 10^{-3}$  mmol, 22.0 mol%),

and K<sub>3</sub>PO<sub>4</sub> (339.6 mg, 1.6 mmol, 16.0 equiv.) for 16 h were reacted. Flash chromatography on silica gel afforded the desired product **4l** as a purple solid (40.0 mg, 57% yield); TLC (5% EtOAc/hexanes, R<sub>f</sub> = 0.5); mp > 260 °C; <sup>1</sup>H NMR (500 MHz, CDCl<sub>3</sub>): δ 7.67-7.64 (m, 6H), 7.54 (d, *J* = 8.0 Hz, 4H), 7.50 (d, *J* = 8.1 Hz, 4H), 7.19 (s, 2H), 7.15 (d, *J* = 8.4 Hz, 2H), 7.09 (d, *J* = 8.1 Hz, 4H), 3.96 (s, 3H); <sup>13</sup>C NMR (126 MHz, CDCl<sub>3</sub>): δ 162.9, 153.9, 147.4, 137.7, 135.5, 135.4, 133.1, 132.8, 132.5, 132.2, 131.1, 130.2, 128.9, 125.9, 118.6, 118.4, 114.8, 113.7, 111.4, 55.8; HRMS (ESI<sup>+</sup>) *m/z* calcd for C<sub>44</sub>H<sub>25</sub>BF<sub>2</sub>N<sub>2</sub>OK [M + K]<sup>+</sup> 741.1790, found 741.1805.

**Table S1.** Optimization of the multiple Suzuki-Miyaura cross-coupling reaction on **3a**.<sup>1</sup>

| Entry | Boronic acid (equiv.) | Pd (0) source                           | Base                                              | Solvent                            | Temp (°C) | Yield <sup>2</sup> |
|-------|-----------------------|-----------------------------------------|---------------------------------------------------|------------------------------------|-----------|--------------------|
| 1     | 4.7                   | Pd(PPh <sub>3</sub> ) <sub>4</sub>      | Na <sub>2</sub> CO <sub>3</sub> <sup>3</sup> (1M) | PhMe                               | 110       | - <sup>4</sup>     |
| 2     | 8                     | Pd(PPh <sub>3</sub> ) <sub>4</sub>      | Na <sub>2</sub> CO <sub>3</sub> (16 equiv.)       | PhMe/THF/ H <sub>2</sub> O (1:1:1) | 80        | 40%                |
| 3     | 8                     | Pd(OAc) <sub>2</sub> SPhos <sup>5</sup> | K <sub>3</sub> PO <sub>4</sub> (16 equiv.)        | CH <sub>3</sub> Ph                 | 90        | 52%                |

<sup>1</sup> Conditions: **3a** (1 equiv), Pd (0) source (10 mol%), 4 h. <sup>2</sup> Isolated yield. <sup>3</sup> Aq. Na<sub>2</sub>CO<sub>3</sub> (1 mL / 1 M). <sup>4</sup> Incomplete reaction and multiple products. <sup>5</sup> SPhos (22 mol%).

## 2. References

- [S1] Belmonte-Vázquez, J.L.; Avellanal-Zaballa, E.; Enríquez-Palacios, E.; Cerdán, L.; Esnal, I.; Bañuelos, J.; Villegas-Gómez, C.; López Arbeloa, I.; Peña-Cabrera, E. Synthetic Approach to Readily Accessible Benzofuran-Fused Borondipyrromethenes as Red-Emitting Laser Dyes. *J. Org. Chem.* **2019**, *84*, 2523–2541. DOI: 10.1021/acs.joc.8b02933
- [S2] Jiao, J.; Pang, W.; Zhou, J.; Wei, Y.; Mu, X.; Bai, G.; Hao, E. Regioselective Stepwise Bromination of Boron Dipyrromethene (BODIPY) Dyes. *J. Org. Chem.* **2011**, *76*, 9988– 9996. DOI: 10.1021/jo201754m
- [S3] Lakshmi, V.; Ravikanth, M. Synthesis of Hexasubstituted Boron-Dipyrromethenes Having a Different Combination of Substituents. *Eur. J. Org. Chem.* **2014**, *2014*, 5757– 5766. DOI: 10.1002/ejoc.201402599
- [S4] Feng, Z.; Jiao, L.; Feng, Y.; Yu, C.; Chen, N.; Wei, Y.; Mu, X.; Hao, E. Regioselective and Stepwise Syntheses of Functionalized BODIPY Dyes through Palladium-Catalyzed Cross-Coupling Reactions and Direct C–H Arylations. *J. Org. Chem.* **2016**, *81*, 6281-6291. DOI: 10.1021/acs.joc.6b00858
- [S5] Liu, P.; Gao, F.; Zhou, L.; Chen, Y.; Chen, Z. Tetrathienyl-functionalized red- and NIR-absorbing BODIPY dyes appending various peripheral substituents. *Org. Biomol. Chem.* **2017**, *15*, 1393-1399. DOI: 10.1039/C6OB02612E

### 3. Photophysical data

**Table S2.** Photophysical properties of the polyphenylBODIPYs in diluted solutions (2  $\mu$ M).

|                    | $\lambda_{ab}$<br>(nm) | $\epsilon_{max} \cdot 10^{-4}$<br>( $M^{-1} \cdot cm^{-1}$ ) | $\lambda_{fl}$<br>(nm) | $\Delta\nu_{St}$<br>( $cm^{-1}$ ) | $\phi$ | $\tau$<br>(ns) | $k_{fl} \cdot 10^{-8}$<br>( $s^{-1}$ ) | $k_{nr} \cdot 10^{-8}$<br>( $s^{-1}$ ) |
|--------------------|------------------------|--------------------------------------------------------------|------------------------|-----------------------------------|--------|----------------|----------------------------------------|----------------------------------------|
| <b>4f</b>          |                        |                                                              |                        |                                   |        |                |                                        |                                        |
| c-hex              | 590.0                  | 6.9                                                          | 621.0                  | 845                               | 0.30   | 2.66           | 1.10                                   | 2.66                                   |
| EtOAc              | 582.0                  | 5.8                                                          | 618.0                  | 1000                              | 0.33   | 2.69           | 1.23                                   | 2.48                                   |
| ACN                | 577.0                  | 5.0                                                          | 623.0                  | 1280                              | 0.26   | 2.28           | 1.39                                   | 3.00                                   |
| <b>4g</b>          |                        |                                                              |                        |                                   |        |                |                                        |                                        |
| c-hex              | 586.0                  | 5.6                                                          | 618.0                  | 885                               | 0.35   | 3.25           | 1.07                                   | 1.20                                   |
| EtOAc              | 579.0                  | 5.1                                                          | 618.0                  | 1090                              | 0.32   | 2.92           | 1.08                                   | 2.34                                   |
| ACN                | 574.0                  | 4.8                                                          | 617.0                  | 1215                              | 0.26   | 2.29           | 1.11                                   | 3.24                                   |
| <b>4h</b>          |                        |                                                              |                        |                                   |        |                |                                        |                                        |
| c-hex              | 575.0                  | 8.0                                                          | 600.5                  | 740                               | 0.52   | 4.15           | 1.26                                   | 1.15                                   |
| EtOAc              | 566.5                  | 7.0                                                          | 597.5                  | 915                               | 0.47   | 3.50           | 1.35                                   | 1.50                                   |
| ACN                | 562.0                  | 5.5                                                          | 598.5                  | 1085                              | 0.40   | 2.91           | 1.36                                   | 2.07                                   |
| <b>4i</b>          |                        |                                                              |                        |                                   |        |                |                                        |                                        |
| c-hex              | 621.5                  | 4.8                                                          | 649.5                  | 695                               | 0.96   | 5.20           | 1.86                                   | 0.07                                   |
| EtOAc              | 615.0                  | 3.9                                                          | 653.0                  | 945                               | 0.78   | 4.12           | 1.89                                   | 0.53                                   |
| ACN                | 608.0                  | 3.6                                                          | 659.5                  | 1285                              | 0.39   | 2.22           | 1.77                                   | 2.73                                   |
| <b>4j</b>          |                        |                                                              |                        |                                   |        |                |                                        |                                        |
| c-hex              | 593.0                  | 6.7                                                          | 623.0                  | 815                               | 0.43   | 3.54           | 1.22                                   | 1.60                                   |
| EtOAc              | 585.0                  | 6.1                                                          | 622.0                  | 1015                              | 0.52   | 3.72           | 1.40                                   | 1.28                                   |
| ACN                | 578.5                  | 5.6                                                          | 624.5                  | 1275                              | 0.40   | 3.00           | 1.33                                   | 1.99                                   |
| <b>4k</b>          |                        |                                                              |                        |                                   |        |                |                                        |                                        |
| Et <sub>2</sub> O* | 586.0                  | 5.5                                                          | 618.0                  | 885                               | 0.88   | 5.47           | 1.60                                   | 0.22                                   |
| EtOAc              | 584.5                  | 4.0                                                          | 617.0                  | 900                               | 0.83   | 5.37           | 1.55                                   | 0.31                                   |
| ACN                | 579.5                  | 2.7                                                          | 614.5                  | 985                               | 0.87   | 5.28           | 1.65                                   | 0.23                                   |
| <b>4l</b>          |                        |                                                              |                        |                                   |        |                |                                        |                                        |
| Et <sub>2</sub> O* | 571.0                  | 7.1                                                          | 602.5                  | 915                               | 0.74   | 4.78           | 1.56                                   | 0.53                                   |
| EtOAc              | 569.0                  | 6.8                                                          | 604.0                  | 1020                              | 0.53   | 4.22           | 1.25                                   | 1.11                                   |
| ACN                | 565.0                  | 5.1                                                          | 603.0                  | 1115                              | 0.48   | 3.70           | 1.29                                   | 1.40                                   |

c-hex: cyclohexane; EtOAc: ethyl acetate; ACN: acetonitrile

\*not soluble in cyclohexane, Et<sub>2</sub>O: diethylether

absorption ( $\lambda_{ab}$ ) and fluorescence ( $\lambda_{fl}$ ) wavelength; Stokes shift ( $\Delta\nu_{St}$ ); molar absorption ( $\epsilon_{max}$ );  
fluorescence quantum yield ( $\phi$ ) and lifetime ( $\tau$ ); radiative ( $k_{fl}$ ) and non-radiative ( $k_{nr}$ ) rate constants

**Table S3.** Laser properties of the polyphenylBODIPYs in concentrated solutions of ethyl acetate.

| C<br>(mM) | $\lambda_{la}$<br>(nm) | %Eff | E <sub>dose</sub><br>(GJ/mol) | C<br>(mM) | $\lambda_{la}$<br>(nm) | %Eff | E <sub>dose</sub><br>(GJ/mol) |
|-----------|------------------------|------|-------------------------------|-----------|------------------------|------|-------------------------------|
| <b>4g</b> |                        |      |                               | <b>4j</b> |                        |      |                               |
| 0.10      | -                      | -    | 9.4                           | 0.10      | 629                    | 4.7  | 13.5                          |
| 0.25      | 625                    | 5.1  |                               | 0.25      | 631                    | 5.9  |                               |
| 0.50      | 628                    | 9.8  |                               | 0.50      | 635                    | 7.5  |                               |
| 0.75      | 630                    | 6.5  |                               | 0.75      | 636                    | 8.3  |                               |
| 1.00      | 633                    | 3.3  |                               | 1.00      | 638                    | 5.1  |                               |
| <b>4h</b> |                        |      |                               | <b>4k</b> |                        |      |                               |
| 0.10      | -                      | -    | 14.2                          | 0.10      | 624                    | 10.0 | 2.3                           |
| 0.25      | 609                    | 11.0 |                               | 0.25      | 627                    | 10.9 |                               |
| 0.50      | 611                    | 13.5 |                               | 0.50      | 625                    | 17.8 |                               |
| 0.75      | 613                    | 12.8 |                               | 0.75      | 623                    | 12.6 |                               |
| 1.00      | 617                    | 8.8  |                               | 1.00      | 621                    | 10.9 |                               |
| <b>4i</b> |                        |      |                               | <b>4l</b> |                        |      |                               |
| 0.10      | -                      | -    | 5.9                           | 0.10      | 607                    | 9.2  | 5.2                           |
| 0.25      | -                      | -    |                               | 0.25      | 612                    | 10.0 |                               |
| 0.50      | 670                    | 6.4  |                               | 0.50      | 609                    | 11.2 |                               |
| 0.75      | 670                    | 4.3  |                               | 0.75      | 610                    | 10.7 |                               |
| 1.00      | 672                    | 4.3  |                               | 1.00      | 608                    | 8.4  |                               |

Lasing wavelength ( $\lambda_{la}$ ) and efficiency (%Eff). Photostability ( $E_{dose}$ ) was calculated as the amount of pumping energy absorbed by the dye to retain 90% of the laser induced emission at the concentration that optimizes the laser efficiency in each dye.

**Table S4.** Photophysical properties of the polythiopheneBODIPYs in diluted solutions (2  $\mu$ M).

|           | $\lambda_{ab}$<br>(nm) | $\epsilon_{max} \cdot 10^{-4}$<br>( $M^{-1} \cdot cm^{-1}$ ) | $\lambda_{fl}$<br>(nm) | $\Delta\nu_{St}$<br>( $cm^{-1}$ ) | $\phi$ | $\tau$<br>(ns) | $k_{fl} \cdot 10^{-8}$<br>( $s^{-1}$ ) | $k_{nr} \cdot 10^{-8}$<br>( $s^{-1}$ ) |
|-----------|------------------------|--------------------------------------------------------------|------------------------|-----------------------------------|--------|----------------|----------------------------------------|----------------------------------------|
| <b>4a</b> |                        |                                                              |                        |                                   |        |                |                                        |                                        |
| c-hex     | 638.5                  | 6.0                                                          | 688.0                  | 1125                              | 0.16   | 3.47           | 0.46                                   | 2.41                                   |
| EtOAc     | 630.0                  | 5.0                                                          | 700.5                  | 1600                              | 0.08   | 1.07           | 0.72                                   | 8.62                                   |
| ACN       | 624.5                  | 4.1                                                          | 711.5                  | 1960                              | 0.03   | 0.42           | 0.59                                   | 22.9                                   |
| <b>4b</b> |                        |                                                              |                        |                                   |        |                |                                        |                                        |
| c-hex     | 636.0                  | 4.0                                                          | 682.0                  | 1060                              | 0.20   | 3.83           | 0.53                                   | 2.07                                   |
| EtOAc     | 628.0                  | 3.4                                                          | 695.0                  | 1535                              | 0.09   | 1.23           | 0.77                                   | 7.34                                   |
| ACN       | 621.5                  | 3.0                                                          | 707.0                  | 1945                              | 0.03   | 0.50           | 0.61                                   | 19.3                                   |
| <b>4c</b> |                        |                                                              |                        |                                   |        |                |                                        |                                        |
| c-hex     | 639.0                  | 5.3                                                          | 685.5                  | 1060                              | 0.21   | 3.85           | 0.54                                   | 2.05                                   |
| EtOAc     | 632.5                  | 4.6                                                          | 696.0                  | 1445                              | 0.11   | 1.32           | 0.81                                   | 6.73                                   |
| ACN       | 627.0                  | 4.1                                                          | 705.5                  | 1775                              | 0.04   | 0.55           | 0.65                                   | 17.5                                   |
| <b>4d</b> |                        |                                                              |                        |                                   |        |                |                                        |                                        |
| c-hex     | 629.0                  | 6.5                                                          | 678.5                  | 1160                              | 0.39   | 4.10           | 0.97                                   | 1.47                                   |
| EtOAc     | 625.0                  | 5.1                                                          | 690.0                  | 1510                              | 0.15   | 1.41           | 1.07                                   | 5.97                                   |
| ACN       | 619.0                  | 4.2                                                          | 703.5                  | 1940                              | 0.05   | 0.62           | 0.83                                   | 15.2                                   |
| <b>4e</b> |                        |                                                              |                        |                                   |        |                |                                        |                                        |
| c-hex     | 650.0                  | 4.8                                                          | 708.0                  | 1260                              | 0.17   | 1.65           | 1.03                                   | 5.02                                   |
| EtOAc     | 639.0                  | 4.1                                                          | 721.0                  | 1780                              | 0.04   | 0.41           | 0.87                                   | 23.5                                   |
| ACN       | 634.5                  | 3.3                                                          | 736.0                  | 2175                              | 0.02   | 0.41           | 0.36                                   | 23.9                                   |

c-hex: cyclohexane; EtOAc: ethyl acetate; ACN: acetonitrile

absorption ( $\lambda_{ab}$ ) and fluorescence ( $\lambda_{fl}$ ) wavelength; Stokes shift ( $\Delta\nu_{St}$ ); molar absorption ( $\epsilon_{max}$ );  
fluorescence quantum yield ( $\phi$ ) and lifetime ( $\tau$ ); radiative ( $k_{fl}$ ) and non-radiative ( $k_{nr}$ ) rate constants

**Table S5.** Laser properties of the polythiopheneBODIPYs in concentrated solutions of ethyl acetate

| C<br>(mM) | $\lambda_{la}$<br>(nm) | %Eff | E <sub>dose</sub><br>(GJ/mol) | C<br>(mM) | $\lambda_{la}$<br>(nm) | %Eff | E <sub>dose</sub><br>(GJ/mol) |
|-----------|------------------------|------|-------------------------------|-----------|------------------------|------|-------------------------------|
| <b>4a</b> |                        |      |                               | <b>4d</b> |                        |      |                               |
| 0.25      | 710                    | 4.6  | 1.3                           | 0.25      | 704                    | 4.2  | 10.0                          |
| 0.50      | 715                    | 10.1 |                               | 0.50      | 704                    | 17.7 |                               |
| 0.75      | 717                    | 11.8 |                               | 0.75      | 705                    | 20.5 |                               |
| 1.00      | 721                    | 9.5  |                               | 1.00      | 710                    | 16.0 |                               |
| <b>4b</b> |                        |      |                               | <b>4e</b> |                        |      |                               |
| 0.25      | 707                    | 6.9  | 5.9                           | 0.25      | -                      | -    | 7.6                           |
| 0.50      | 709                    | 11.4 |                               | 0.50      | 744                    | 4.8  |                               |
| 0.75      | 712                    | 11.4 |                               | 0.75      | 744                    | 8.7  |                               |
| 1.00      | 714                    | 11.1 |                               | 1.00      | 747                    | 8.2  |                               |
| <b>4c</b> |                        |      |                               |           |                        |      |                               |
| 0.25      | 705                    | 7.0  | 7.6                           |           |                        |      |                               |
| 0.50      | 710                    | 9.3  |                               |           |                        |      |                               |
| 0.75      | 713                    | 8.4  |                               |           |                        |      |                               |
| 1.00      | 721                    | 6.5  |                               |           |                        |      |                               |

lasing wavelength ( $\lambda_{la}$ ) and efficiency (%Eff). Photostability ( $E_{dose}$ ) was calculated as the amount of pumping energy absorbed by the dye to retain 90% of the laser induced emission at the concentration that optimizes the laser efficiency in each dye.



#### 4. Absorption and fluorescence spectra

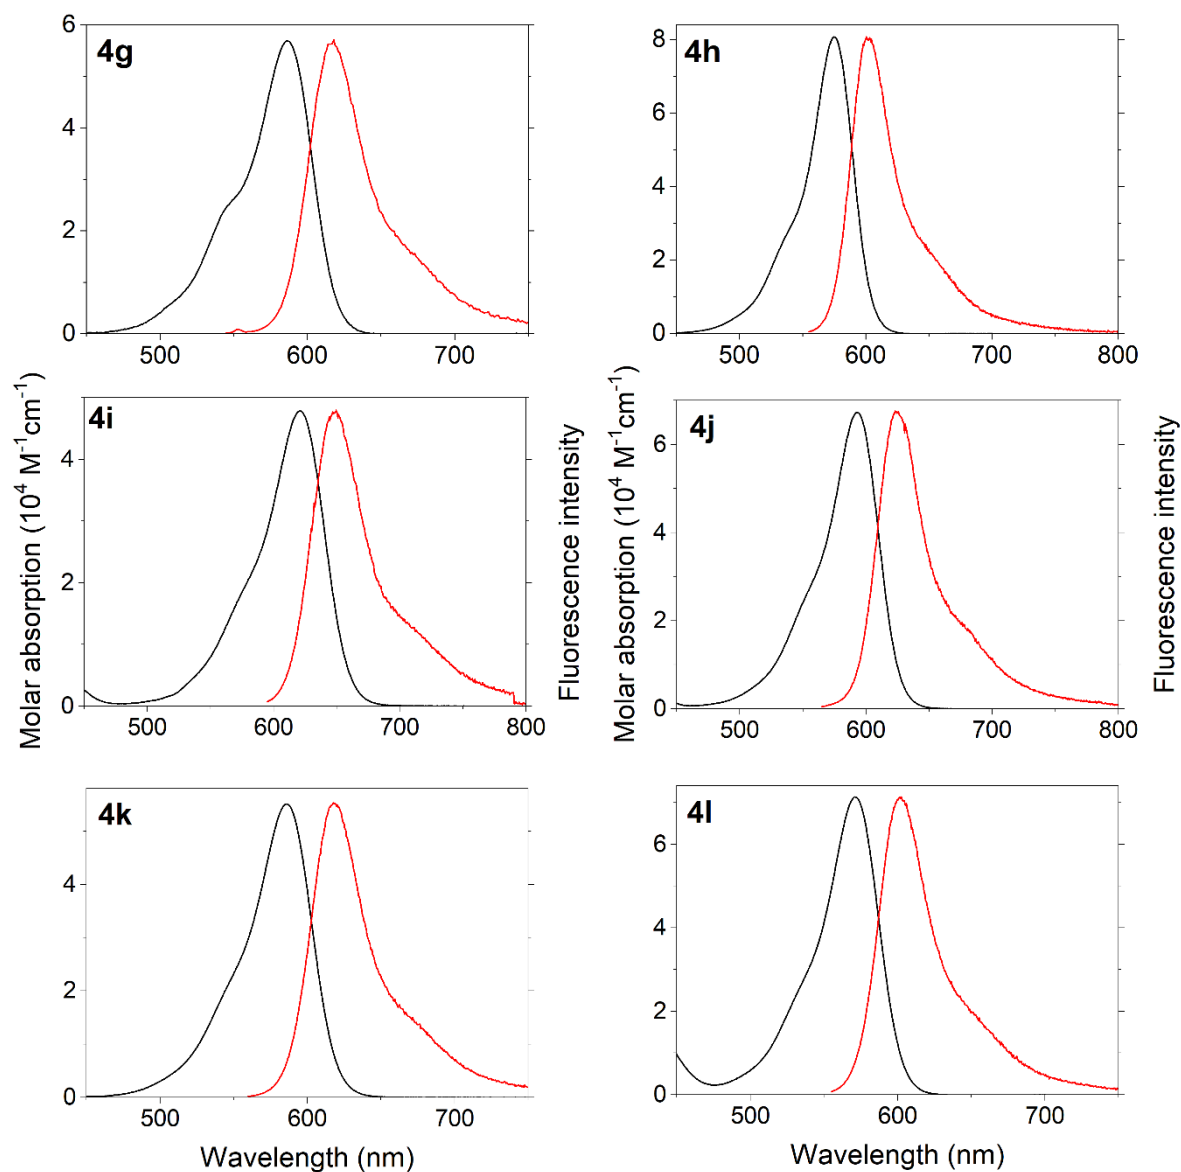

**Figure S1.** Absorption and normalized fluorescence (red) spectra of polyarylated BODIPYs in diluted solutions of cyclohexane (except for **4l** and **4k**, which are in diethyleter owing to solubility reasons).

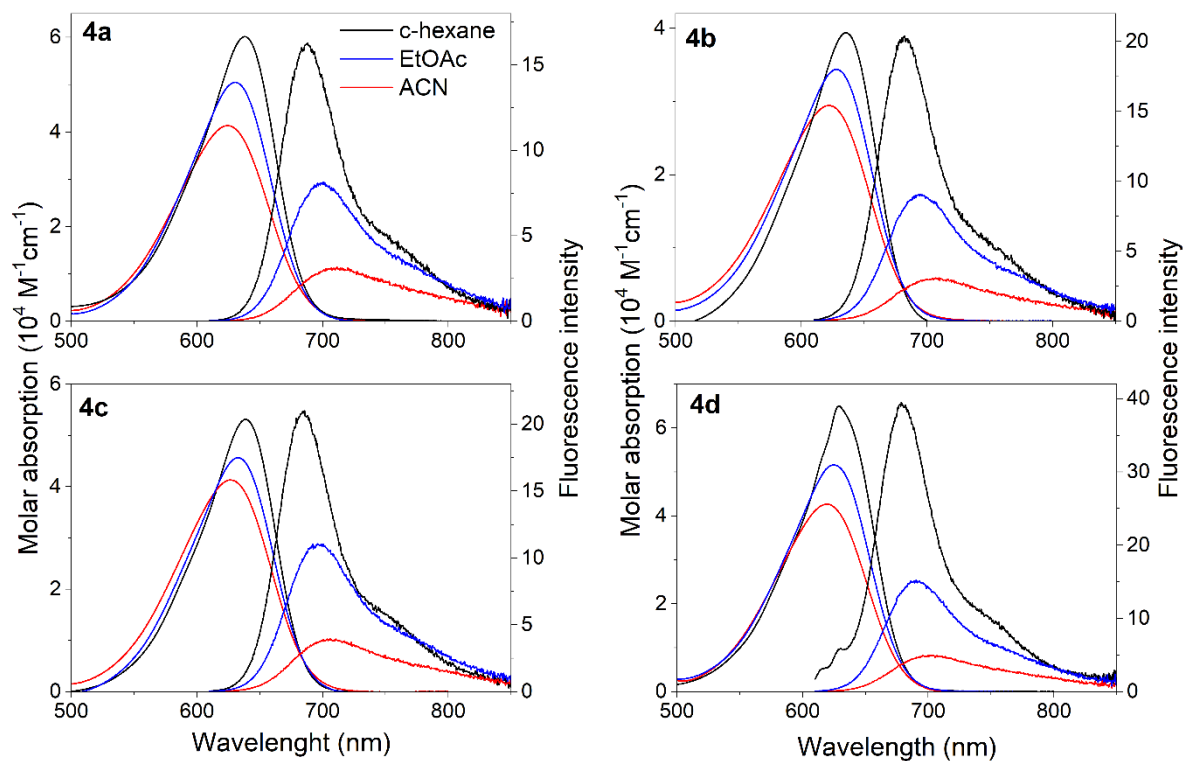

**Figure S2.** Absorption and fluorescence spectra of polythiopheneBODIPYs in diluted solutions of solvents of different polarity.

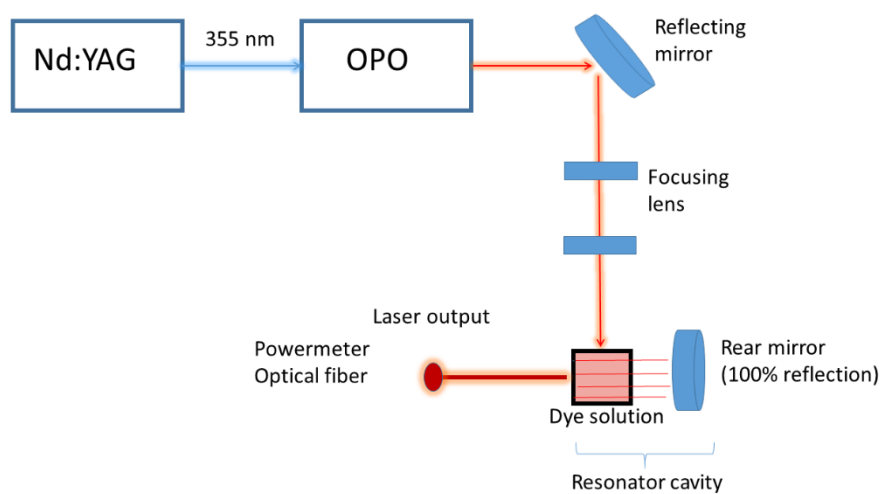

**Scheme S1.** Experimental set up for the laser measurements

## 6. $^1\text{H}$ NMR and $^{13}\text{C}$ NMR spectra

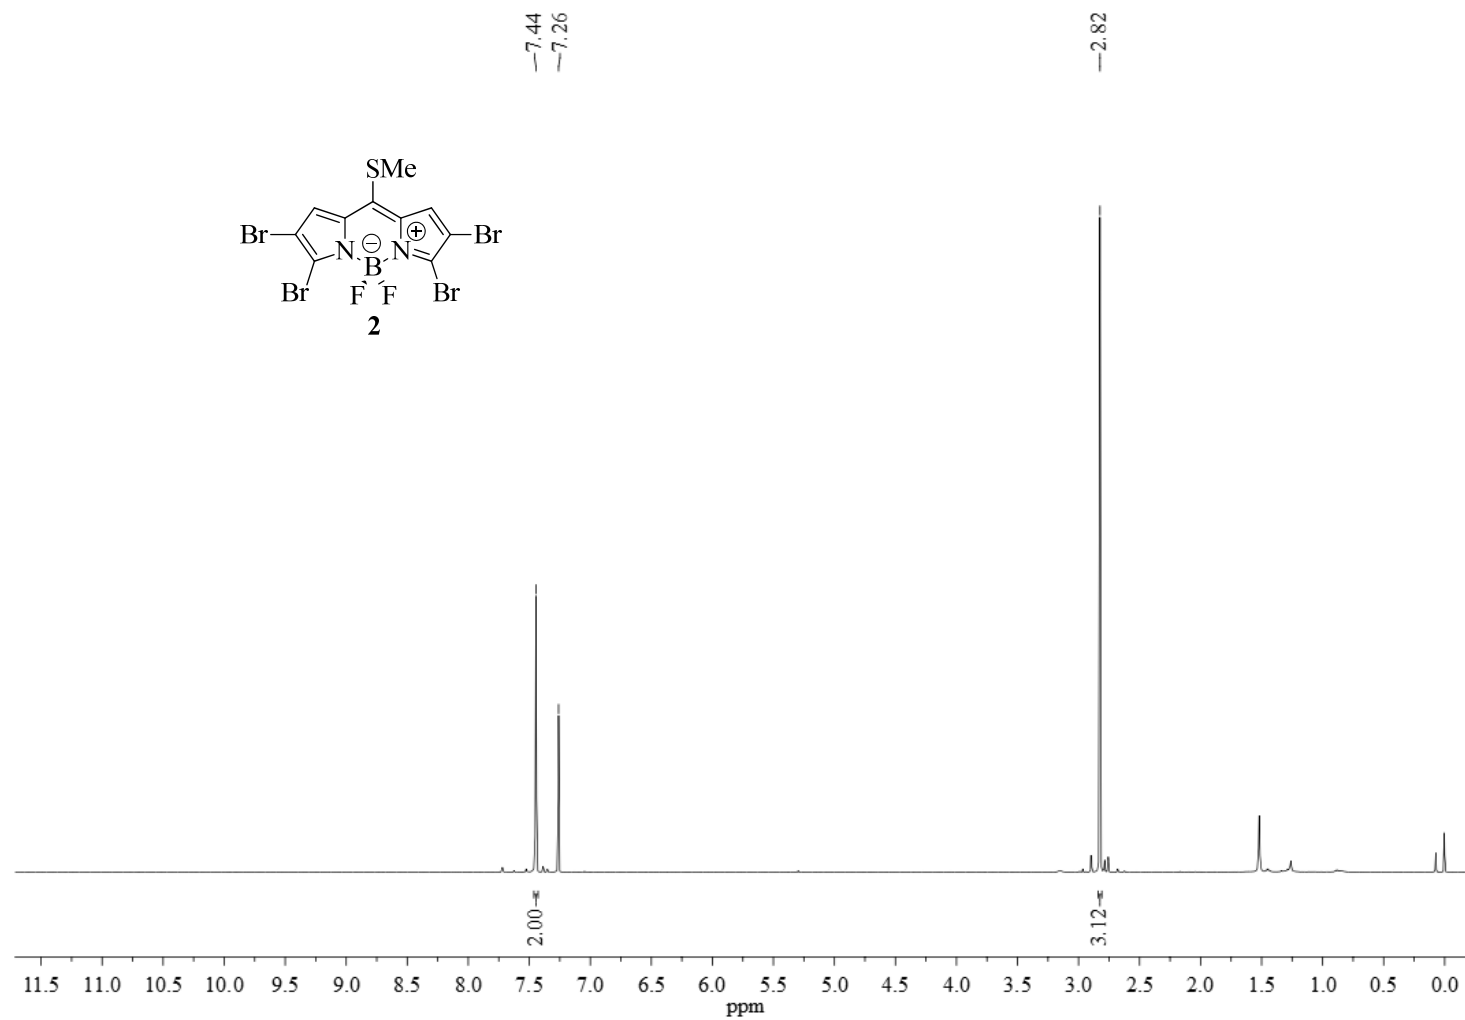

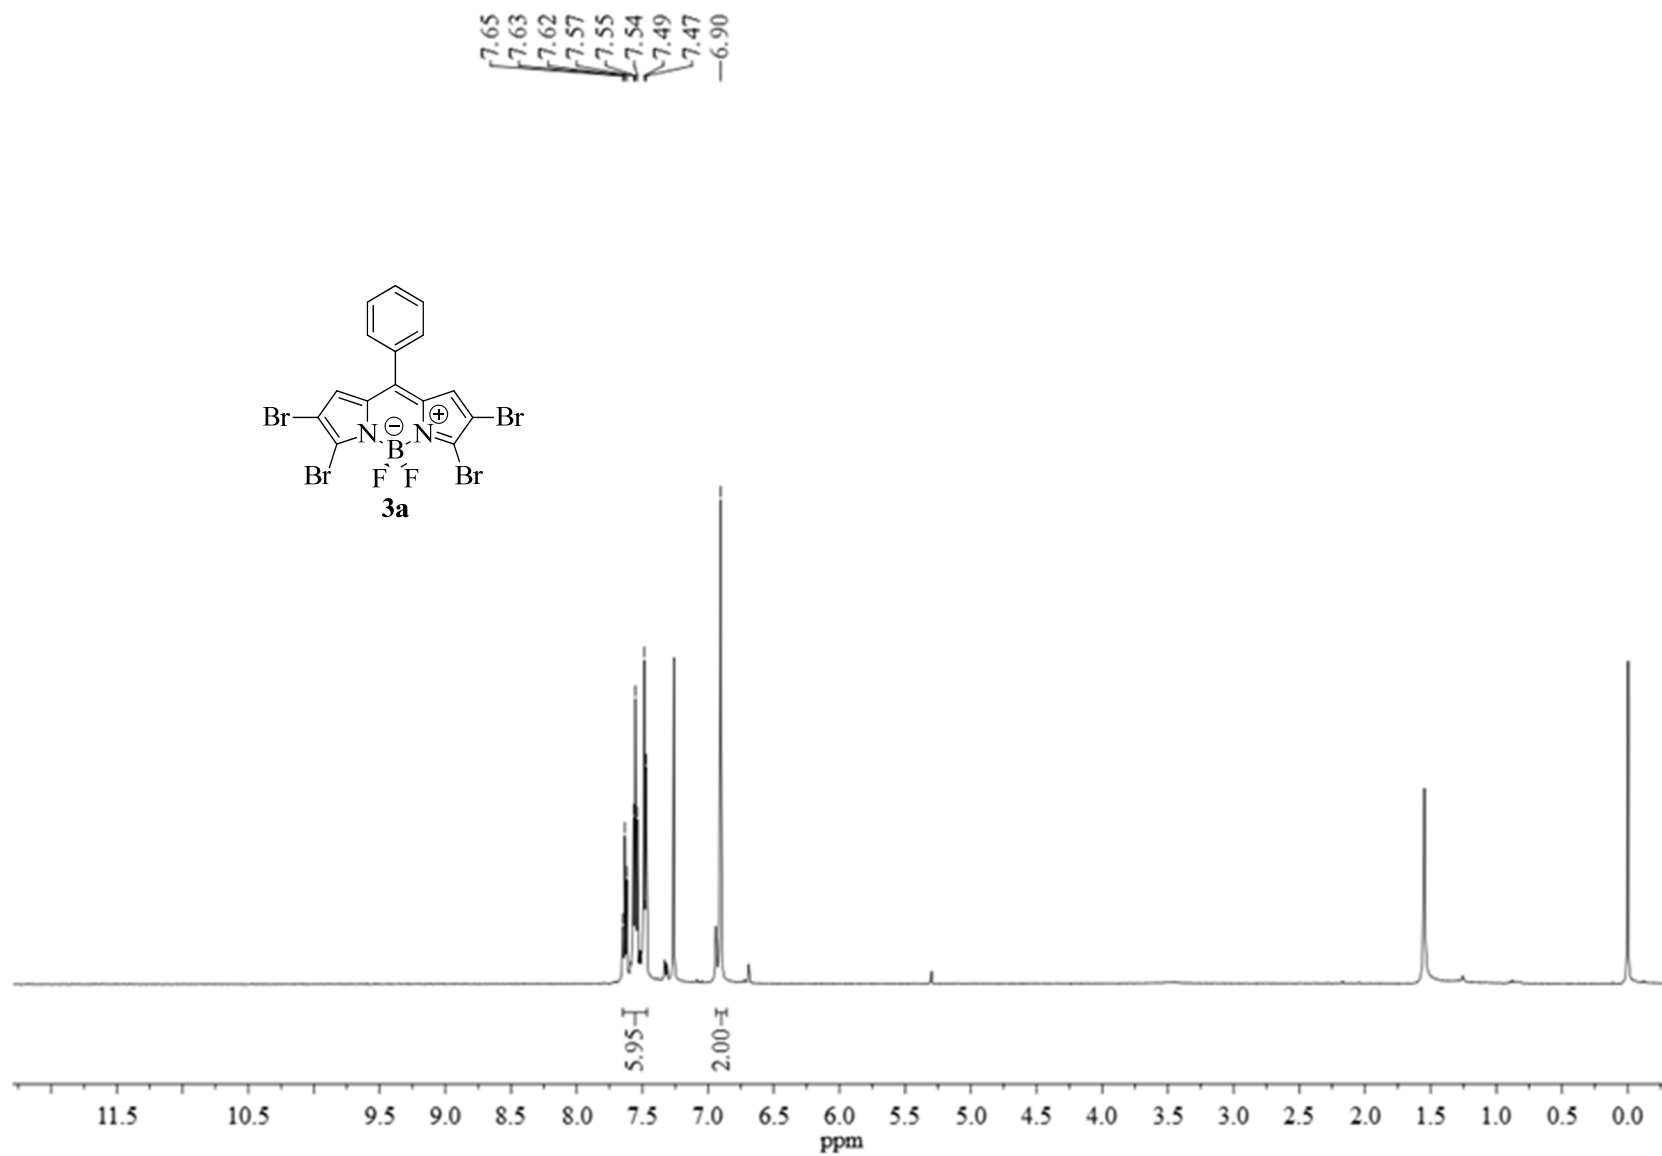

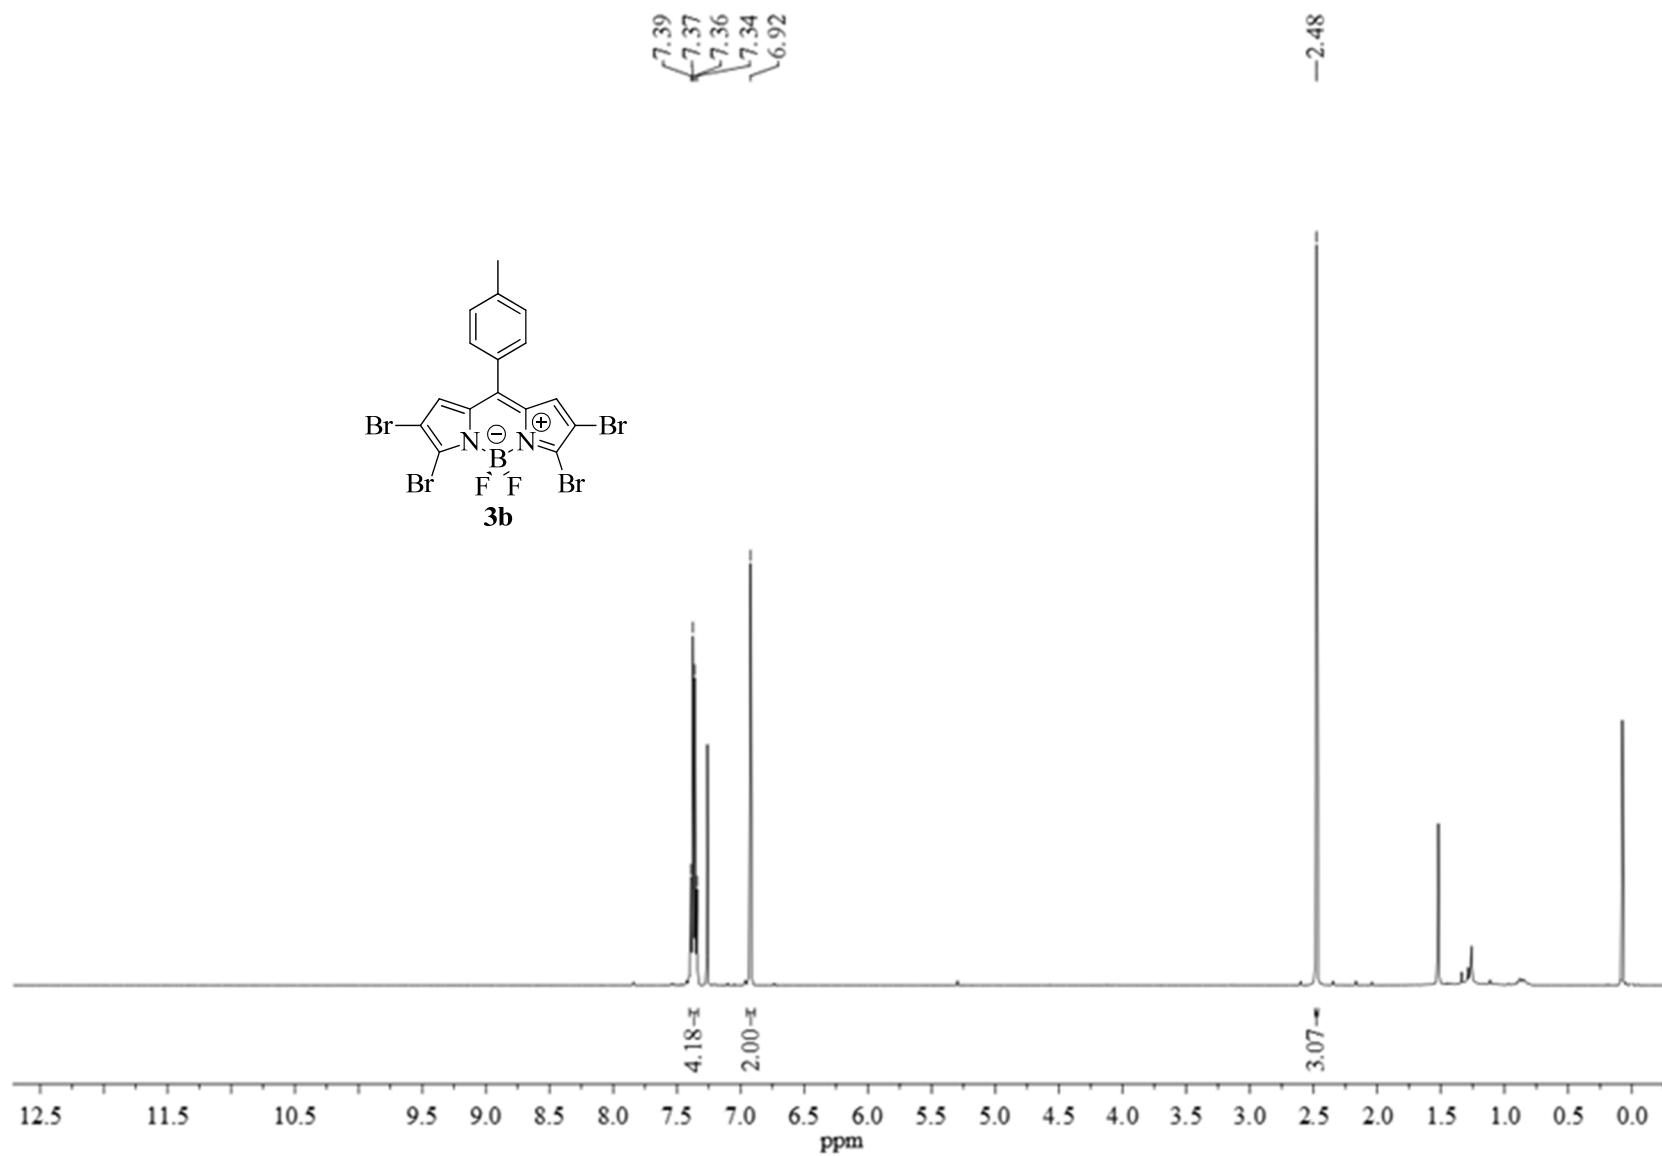

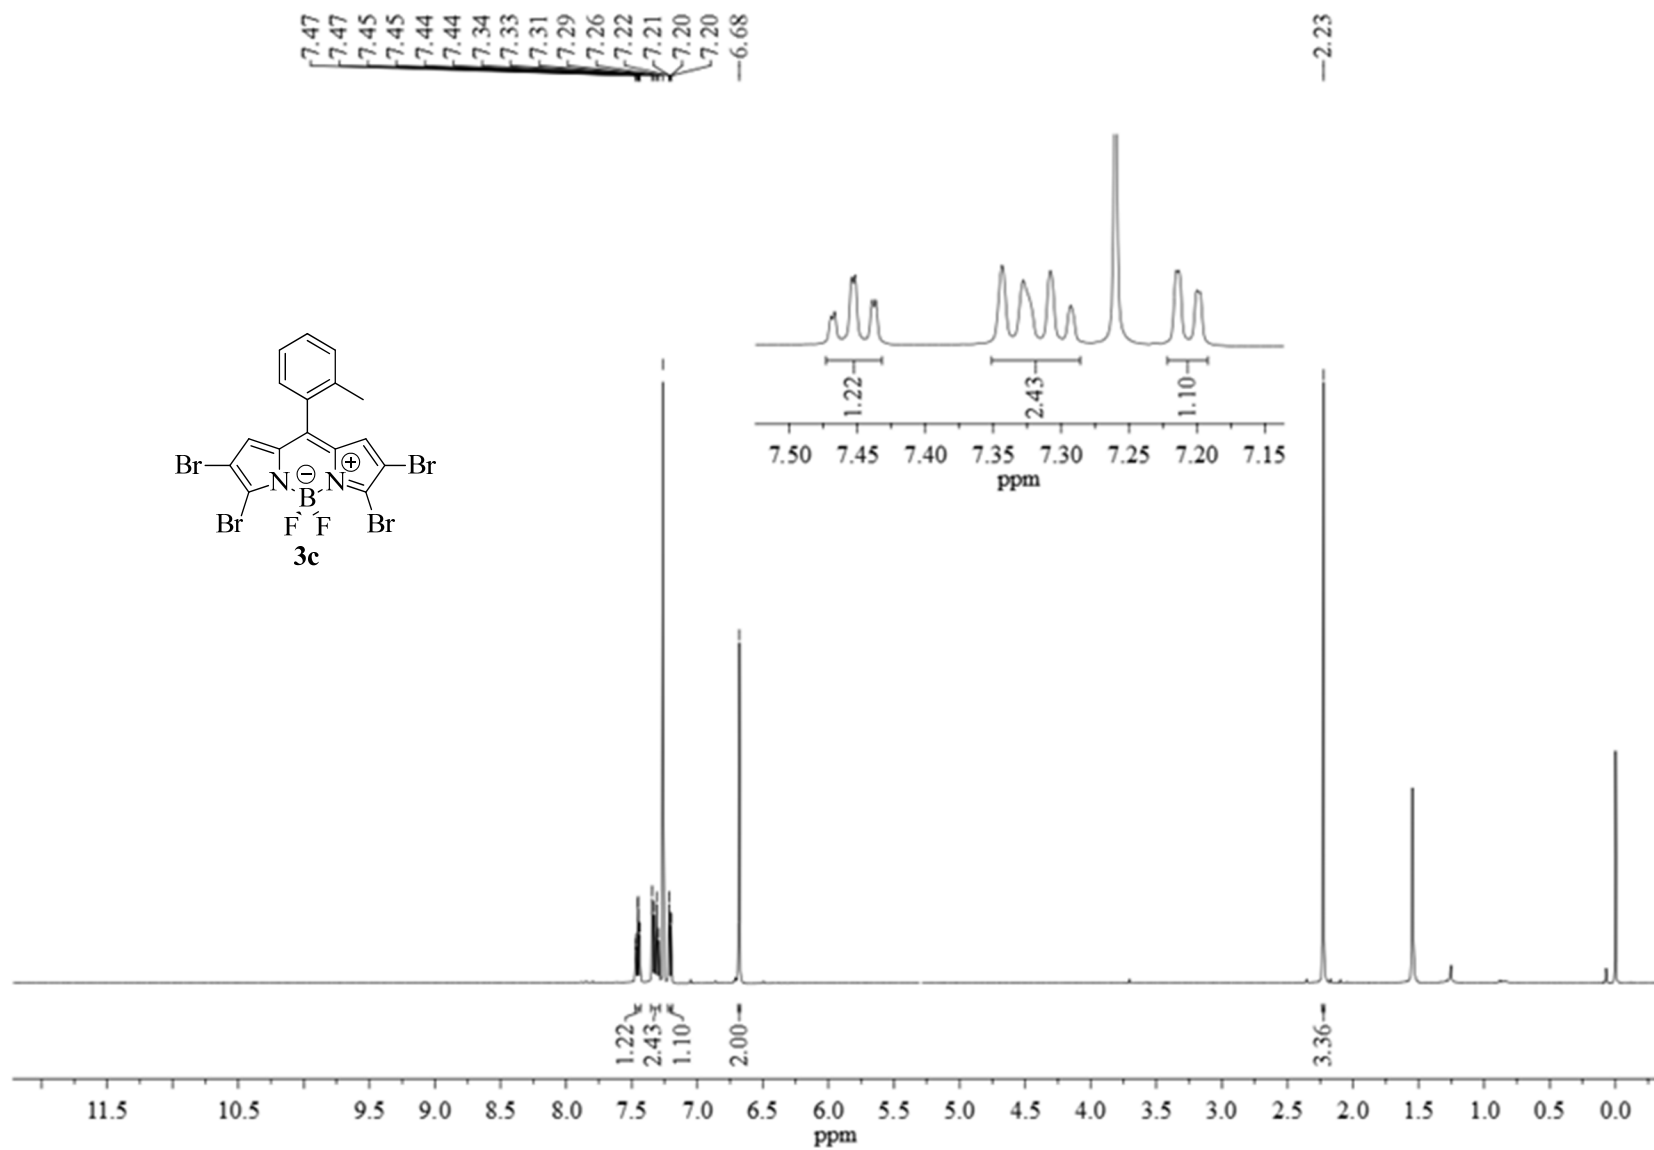

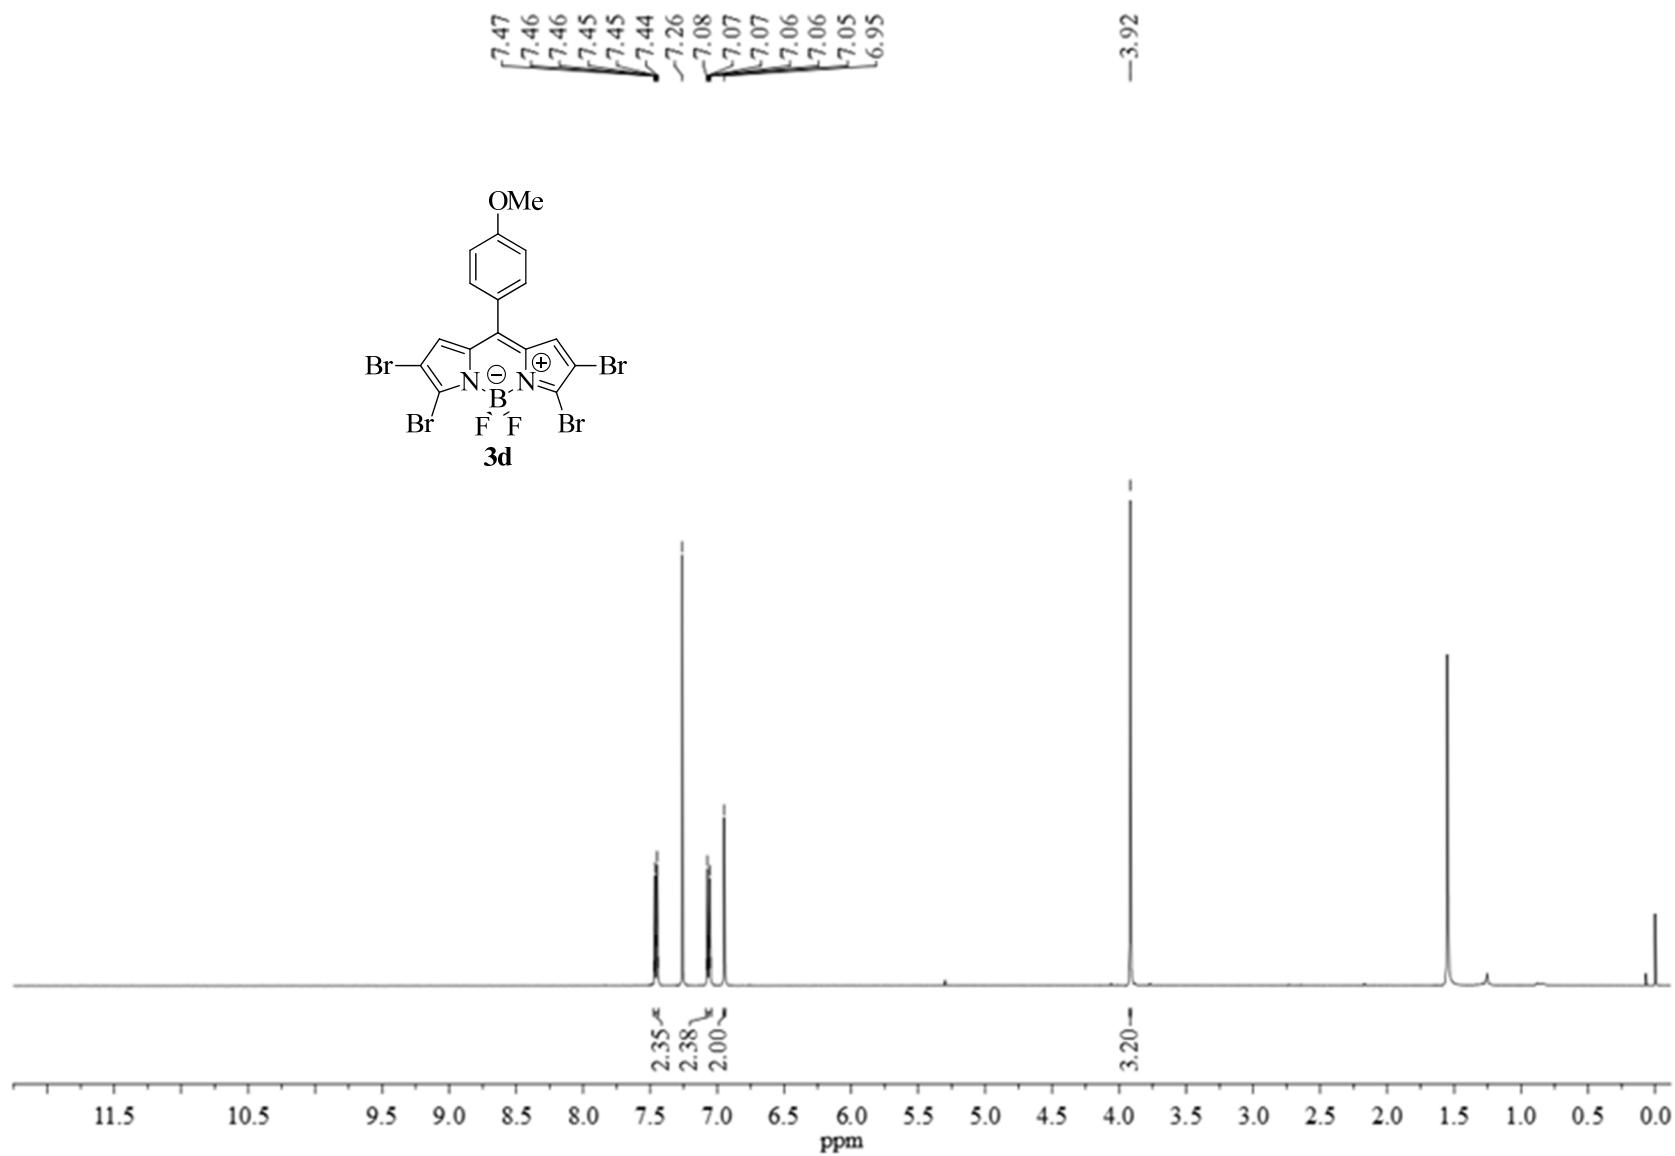

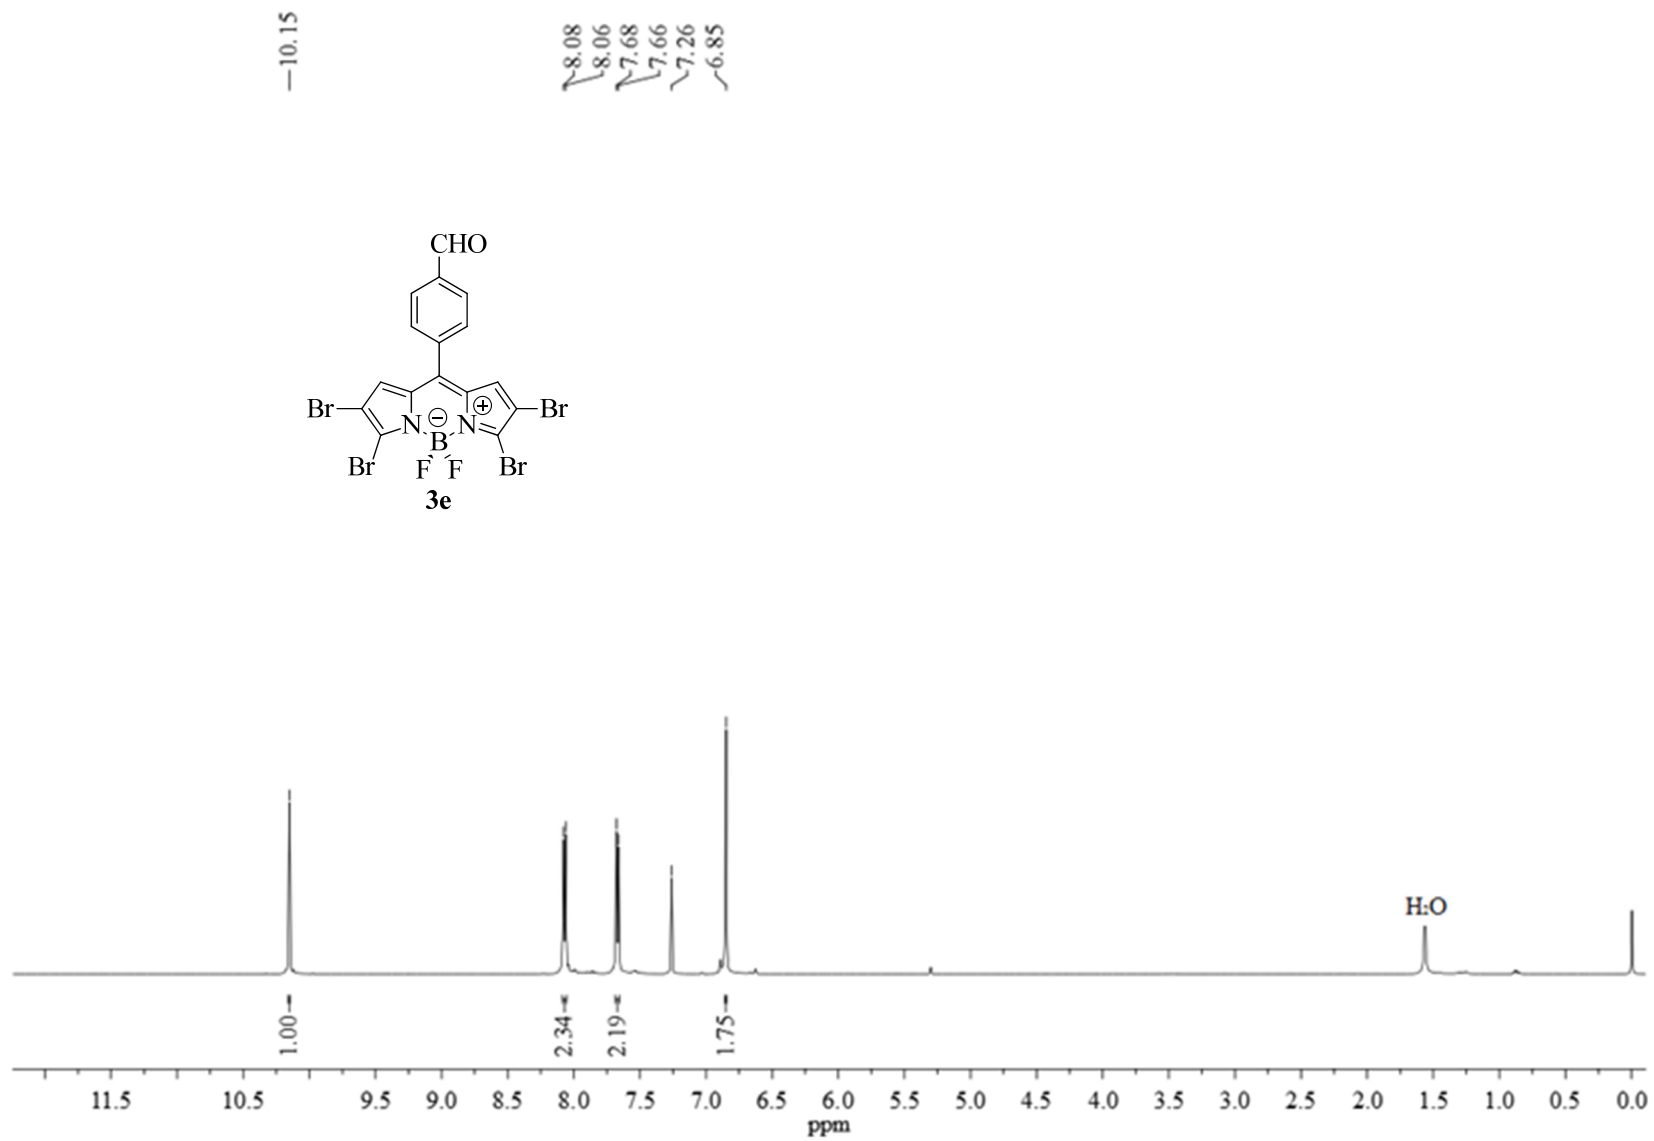



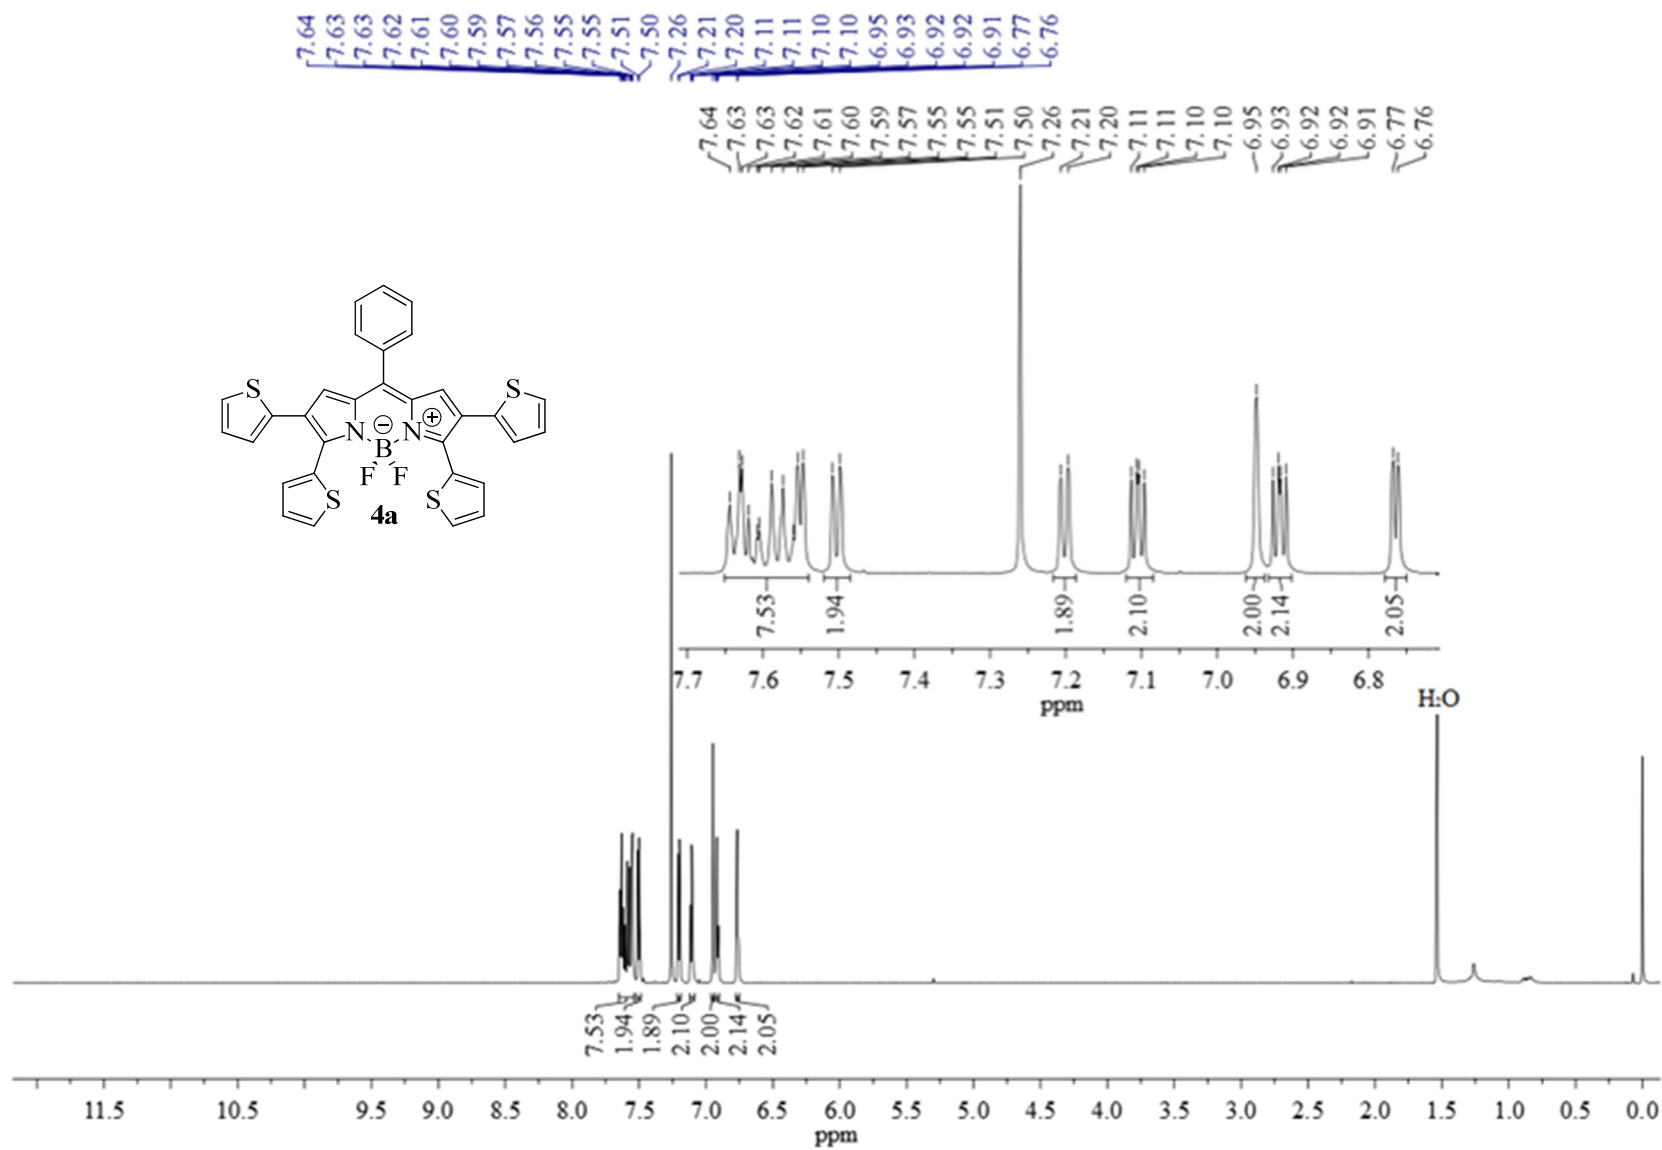

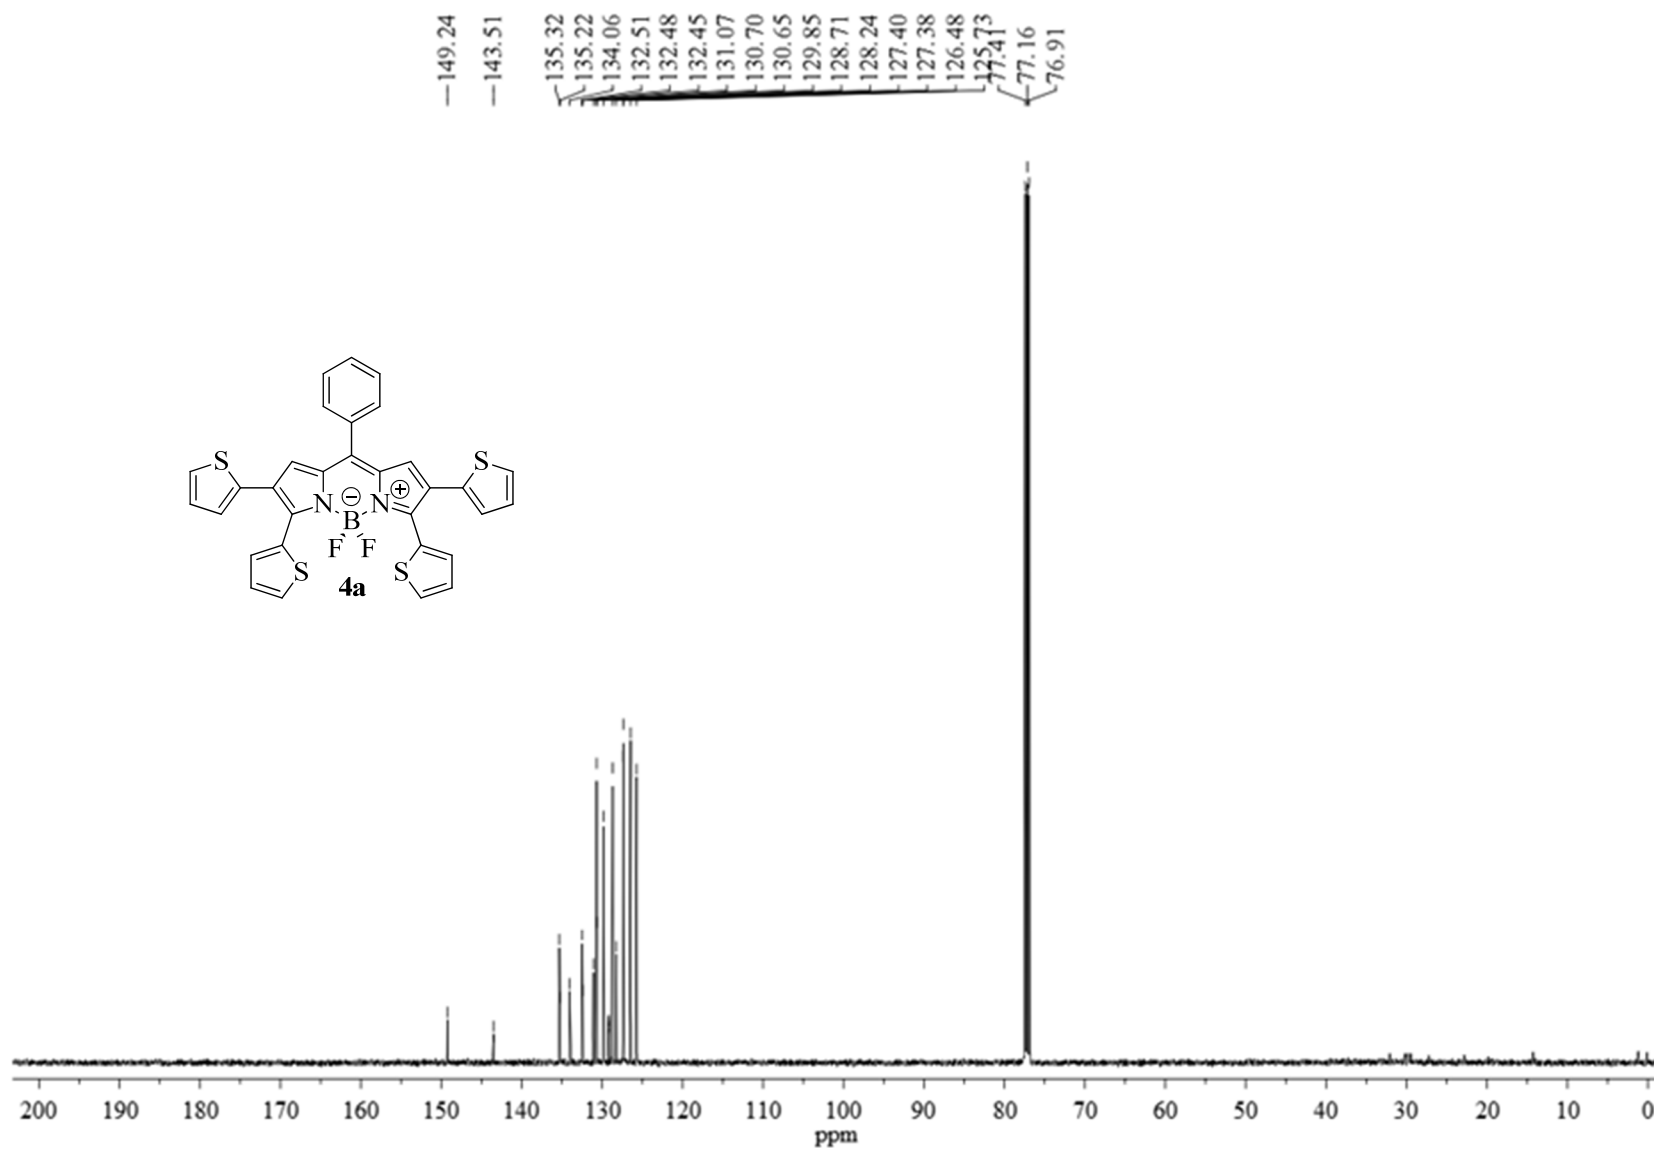

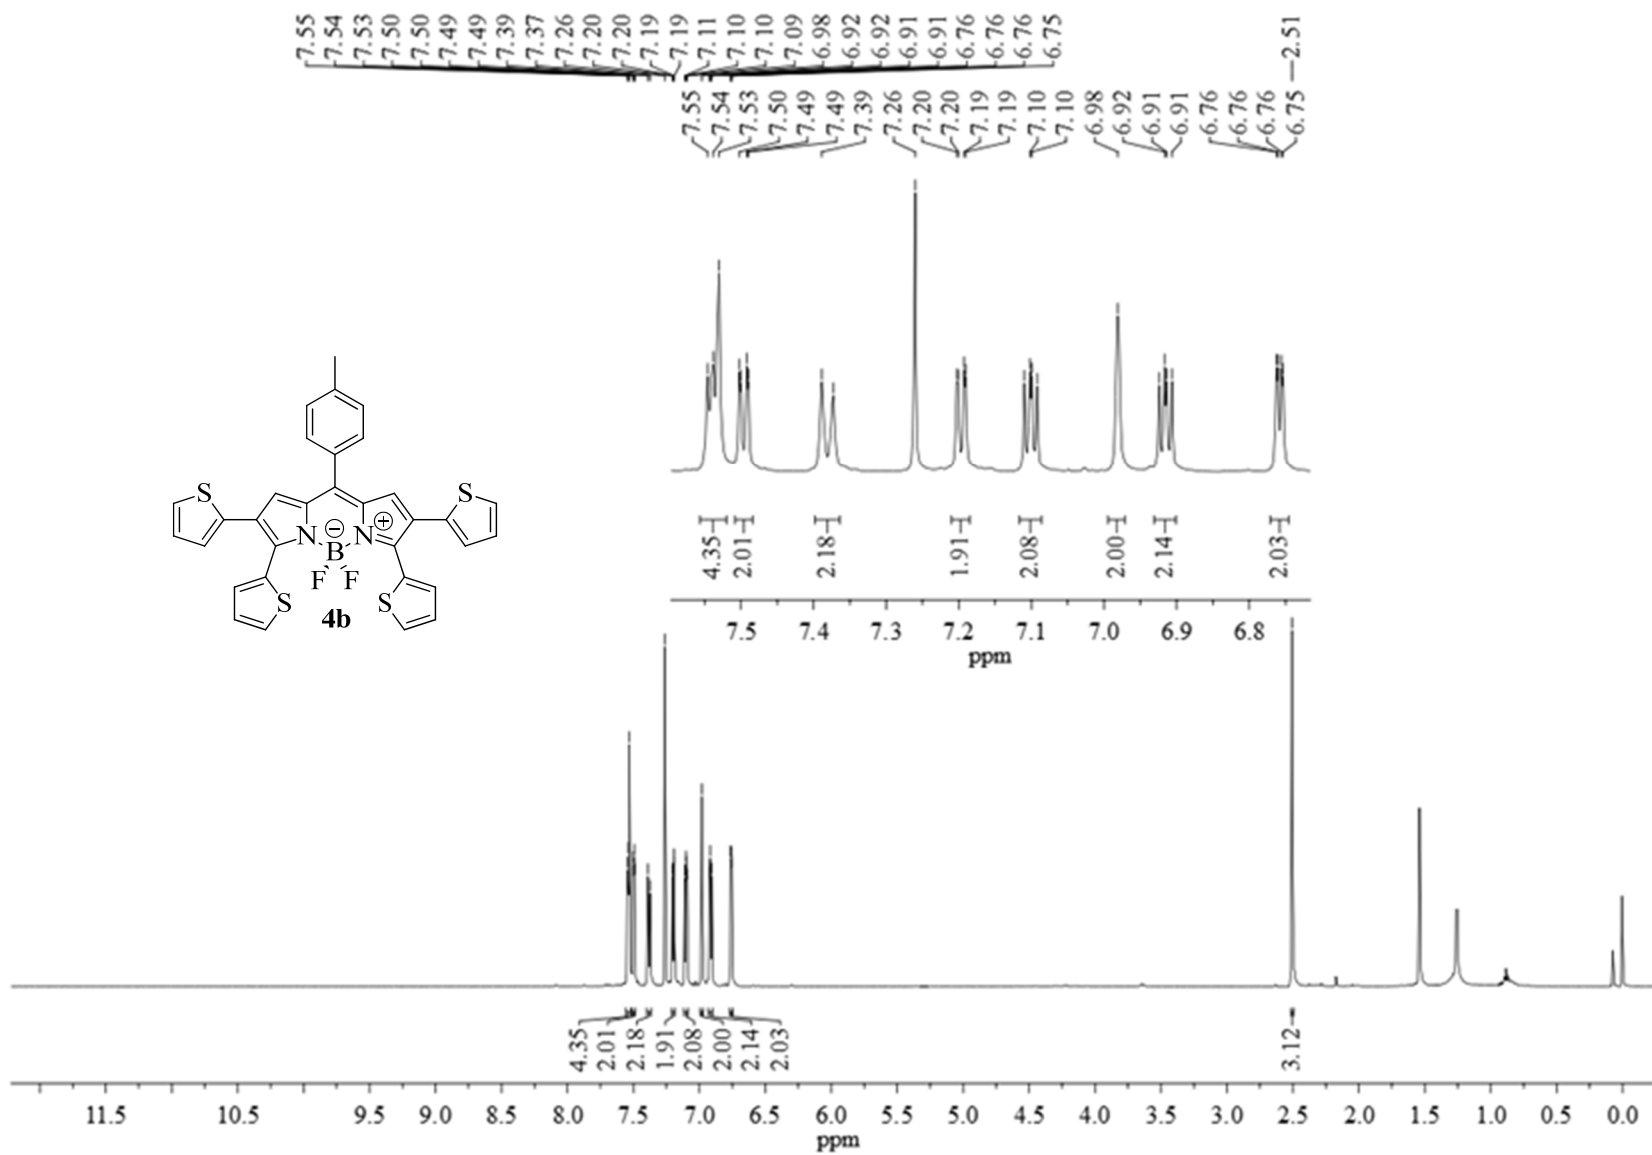

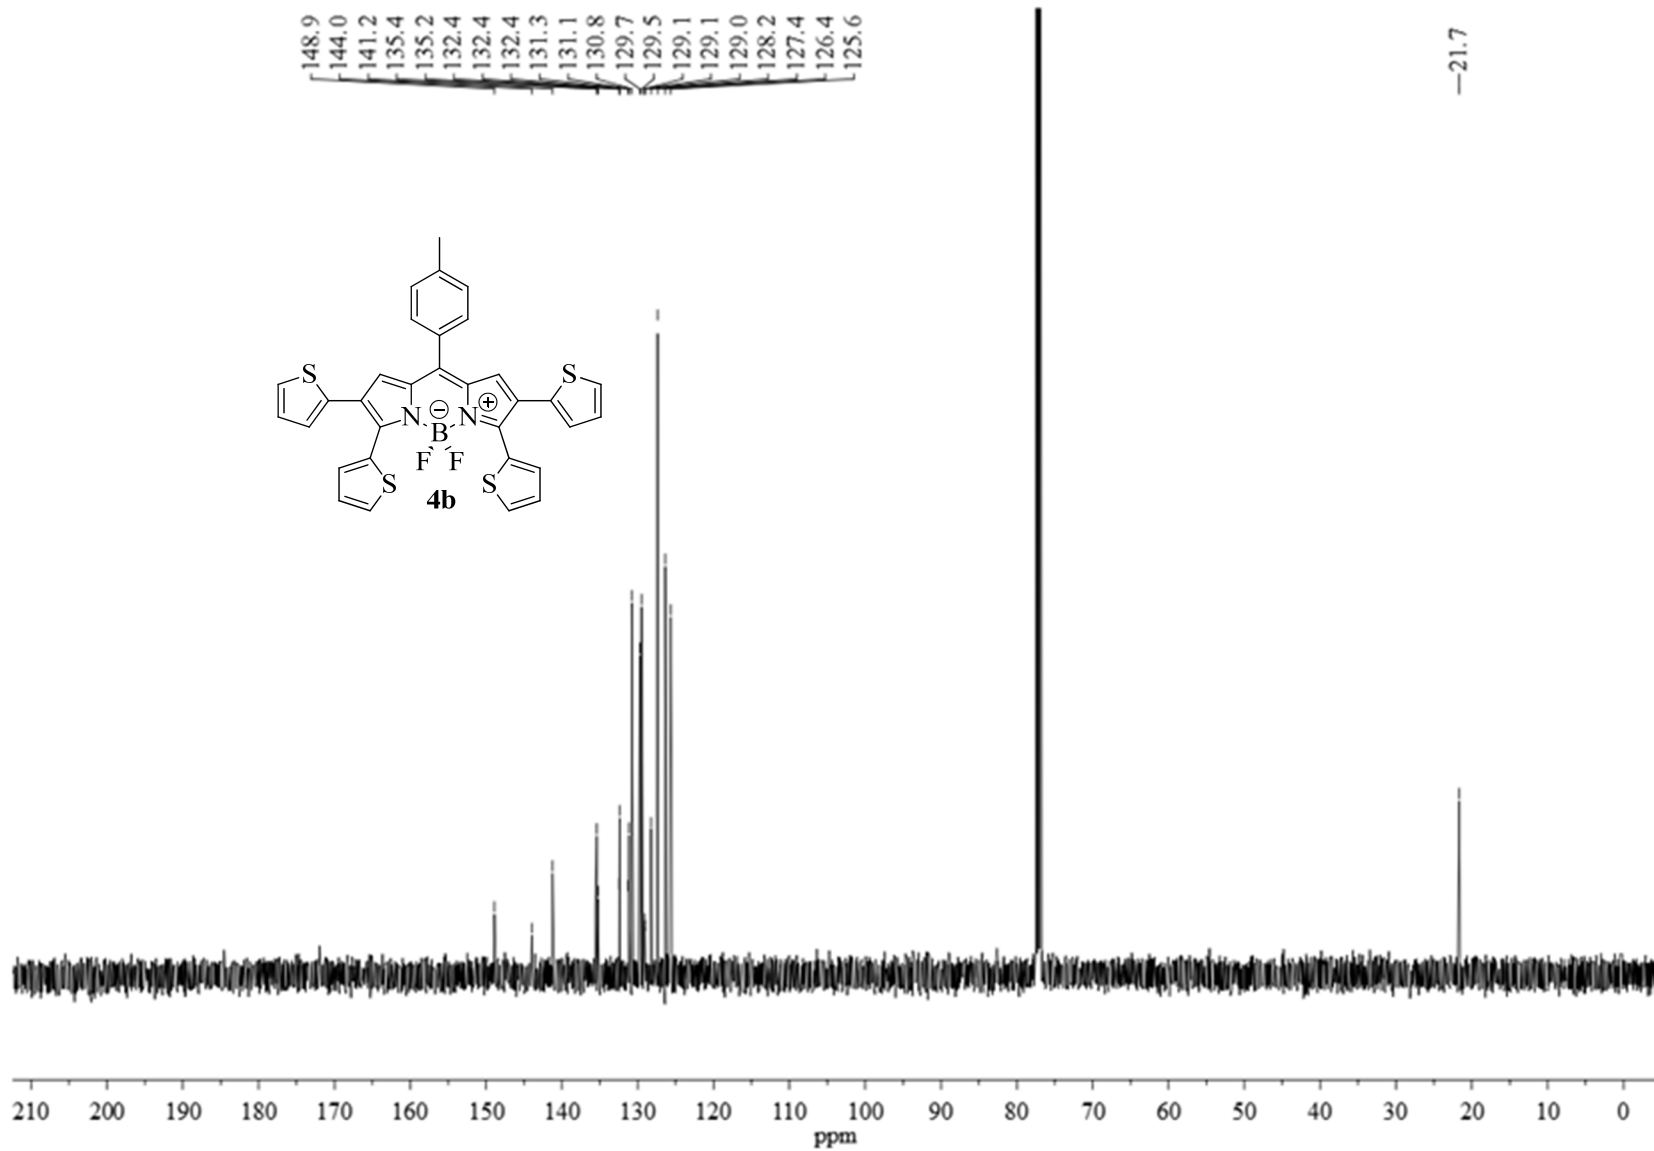

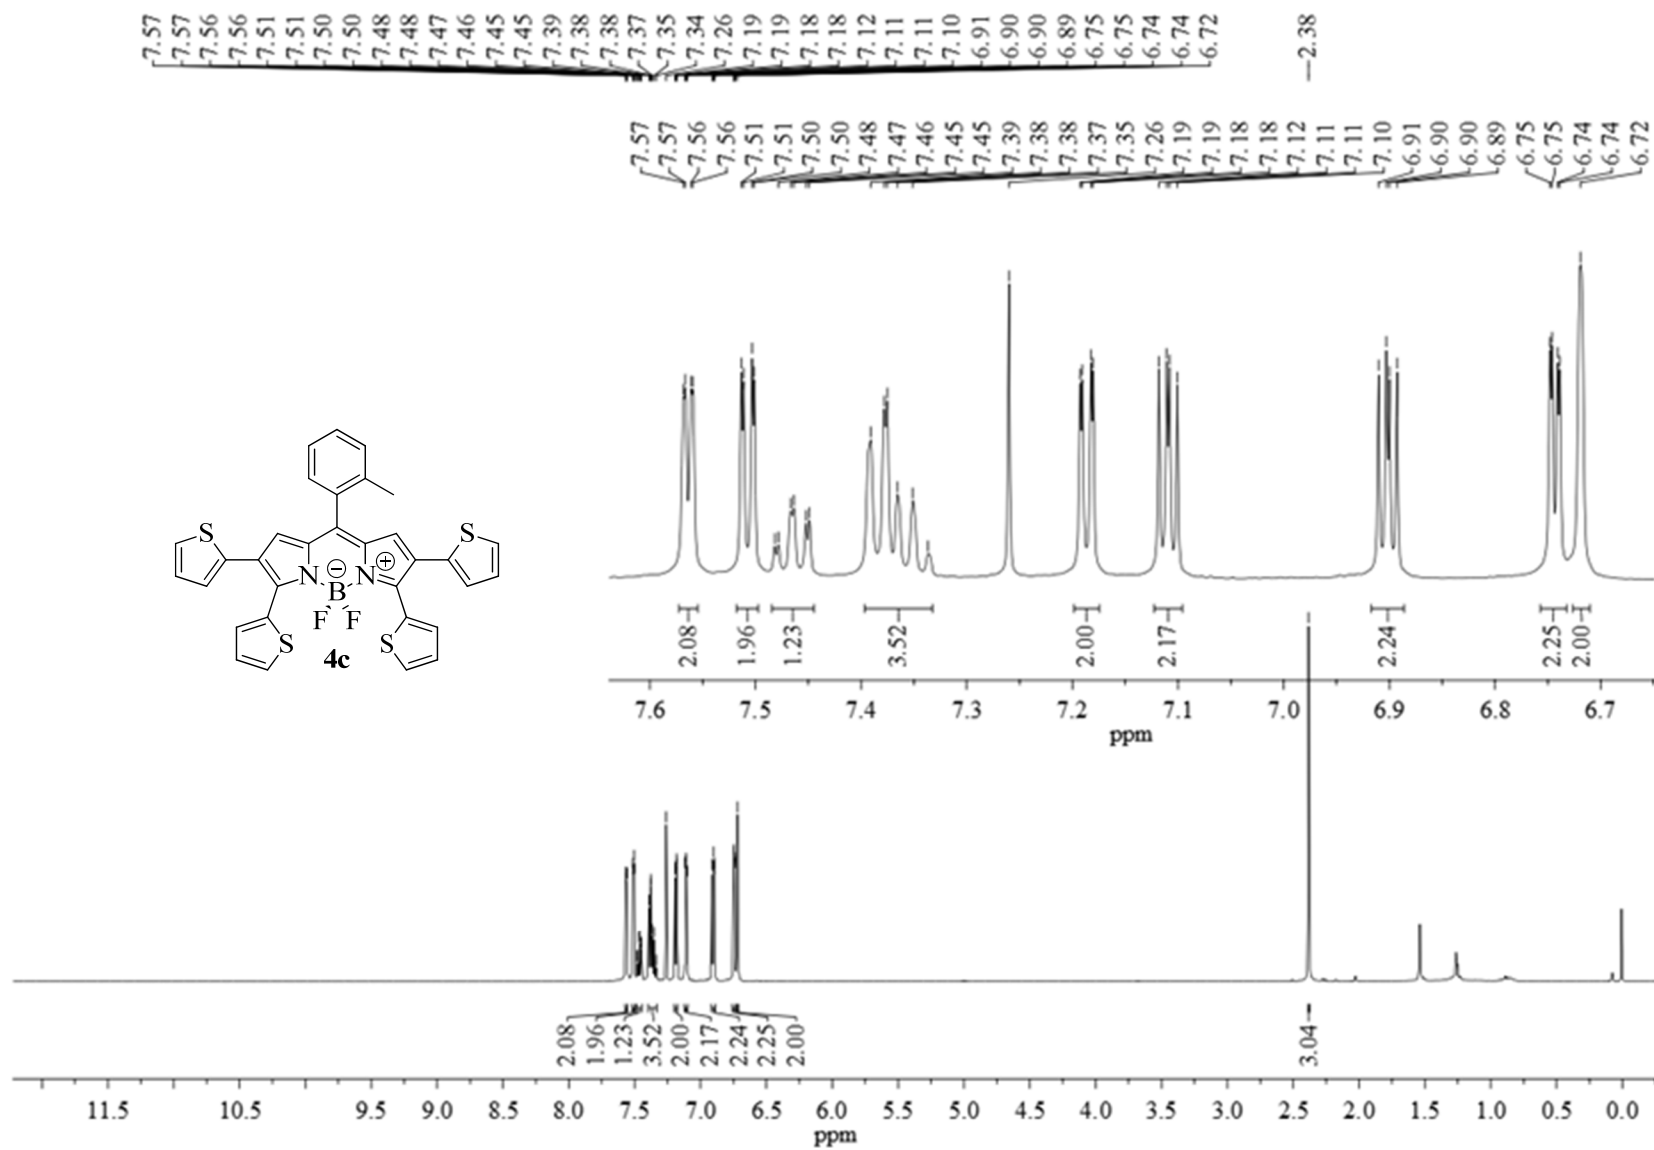

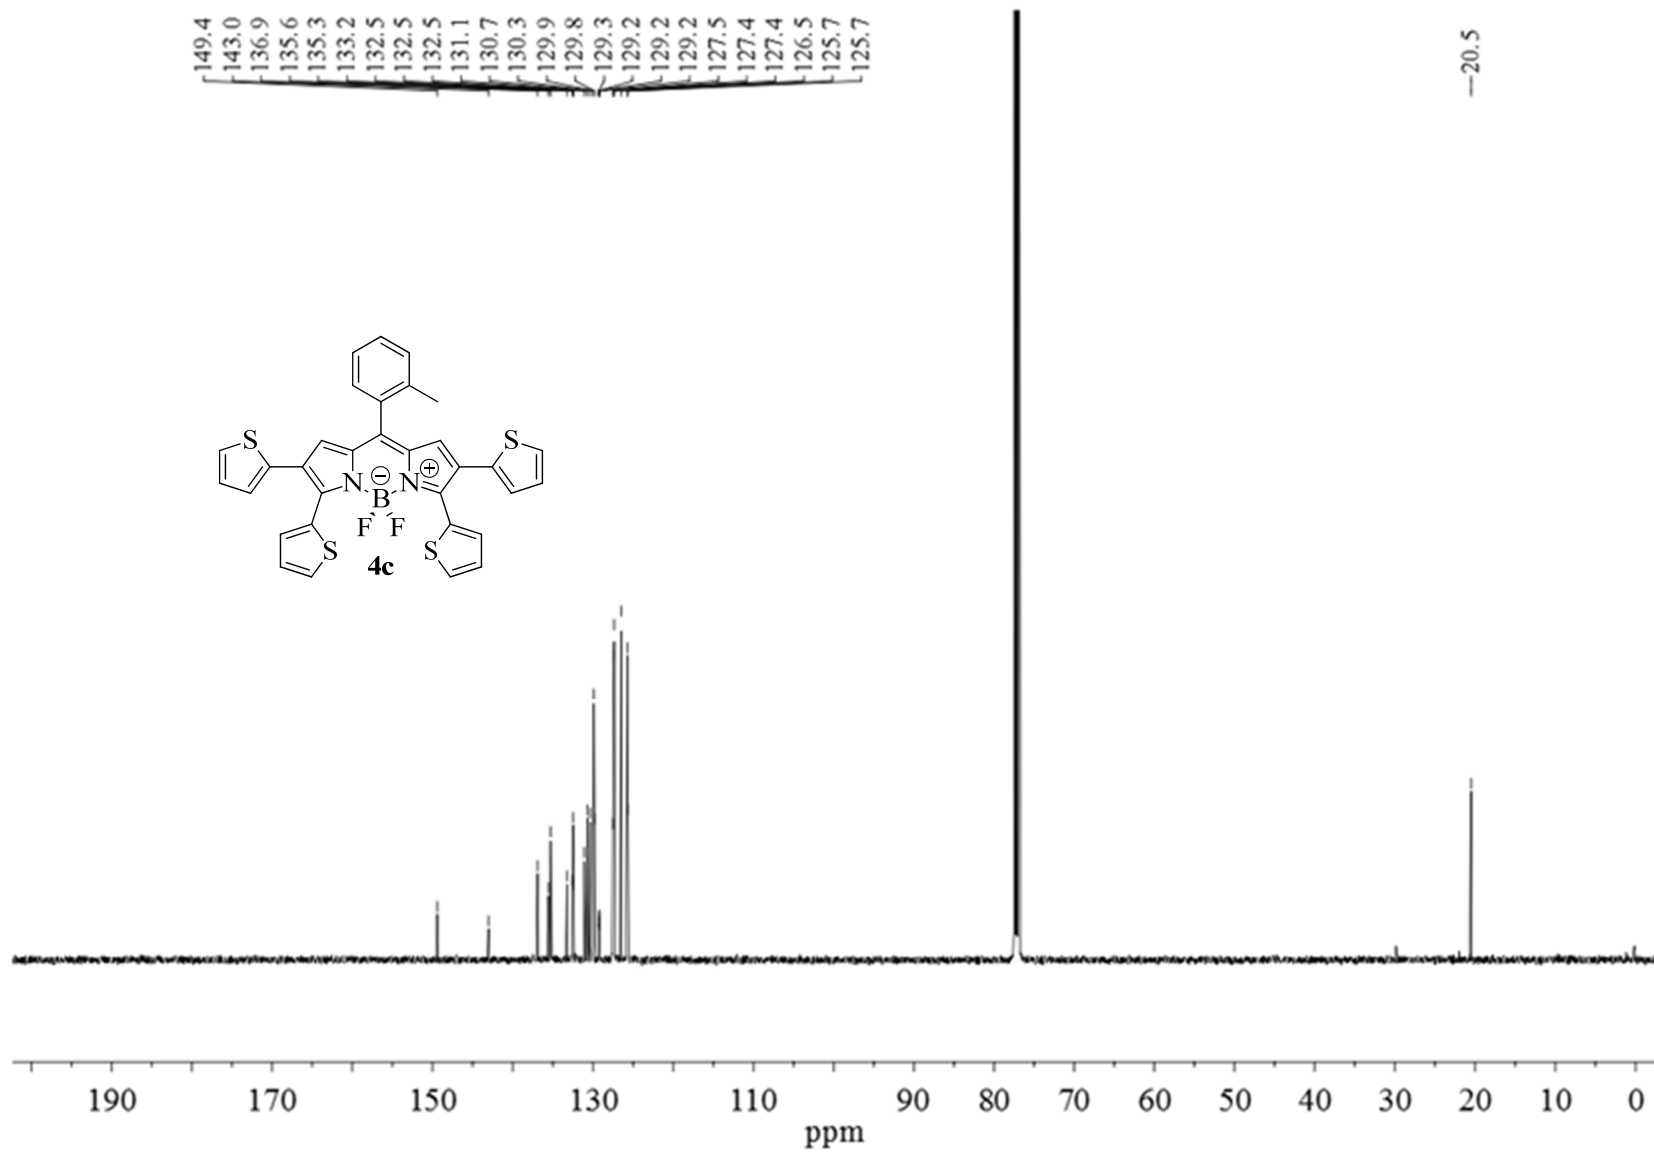

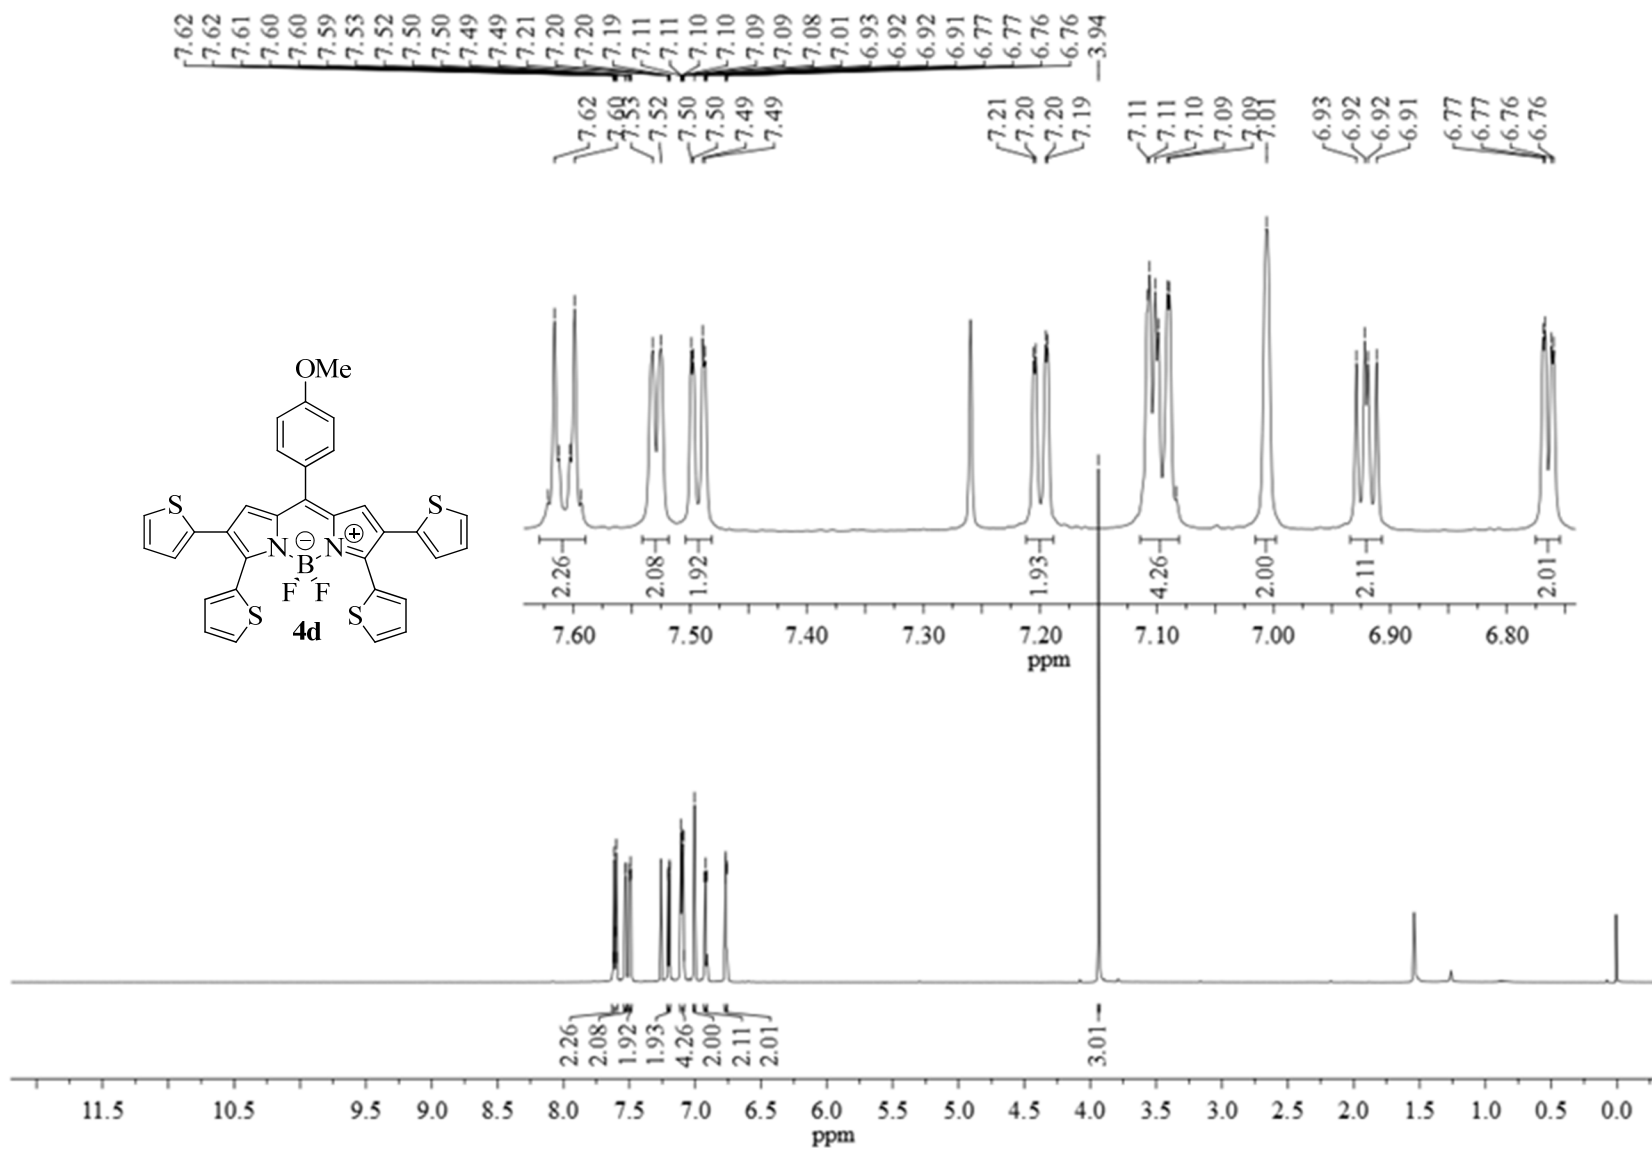

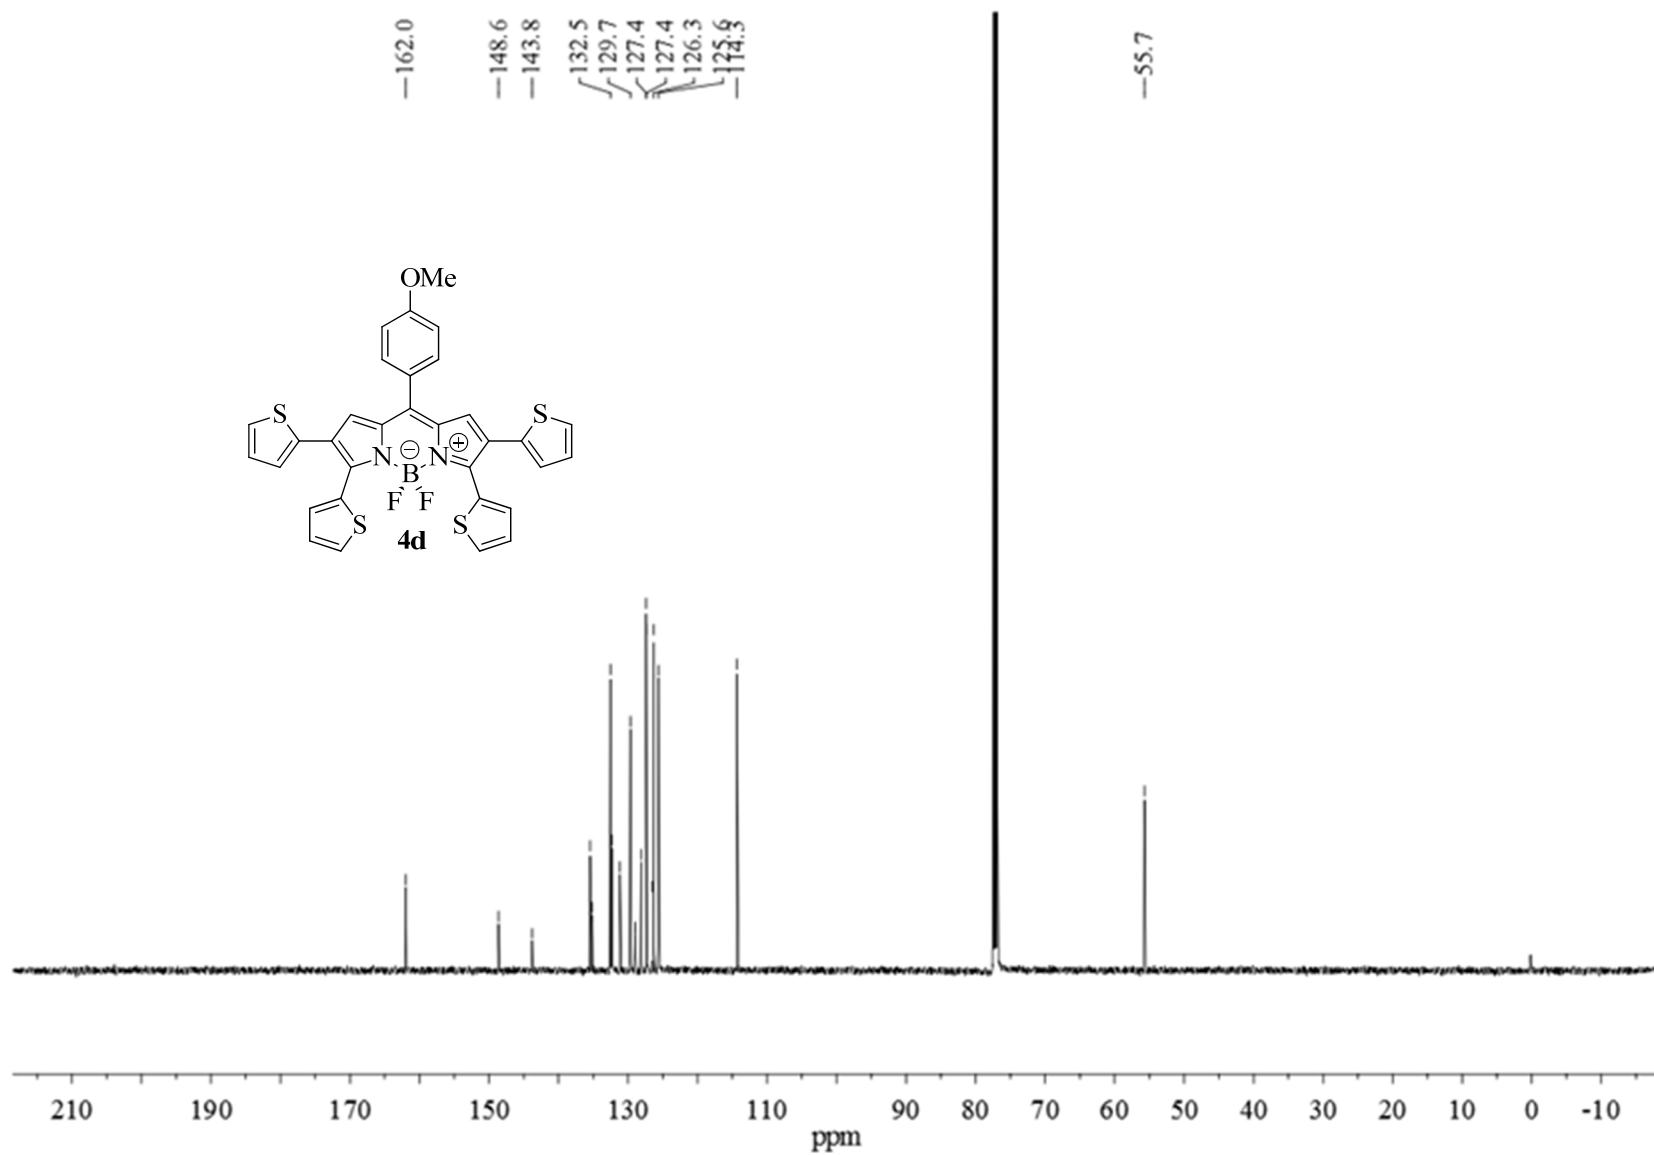



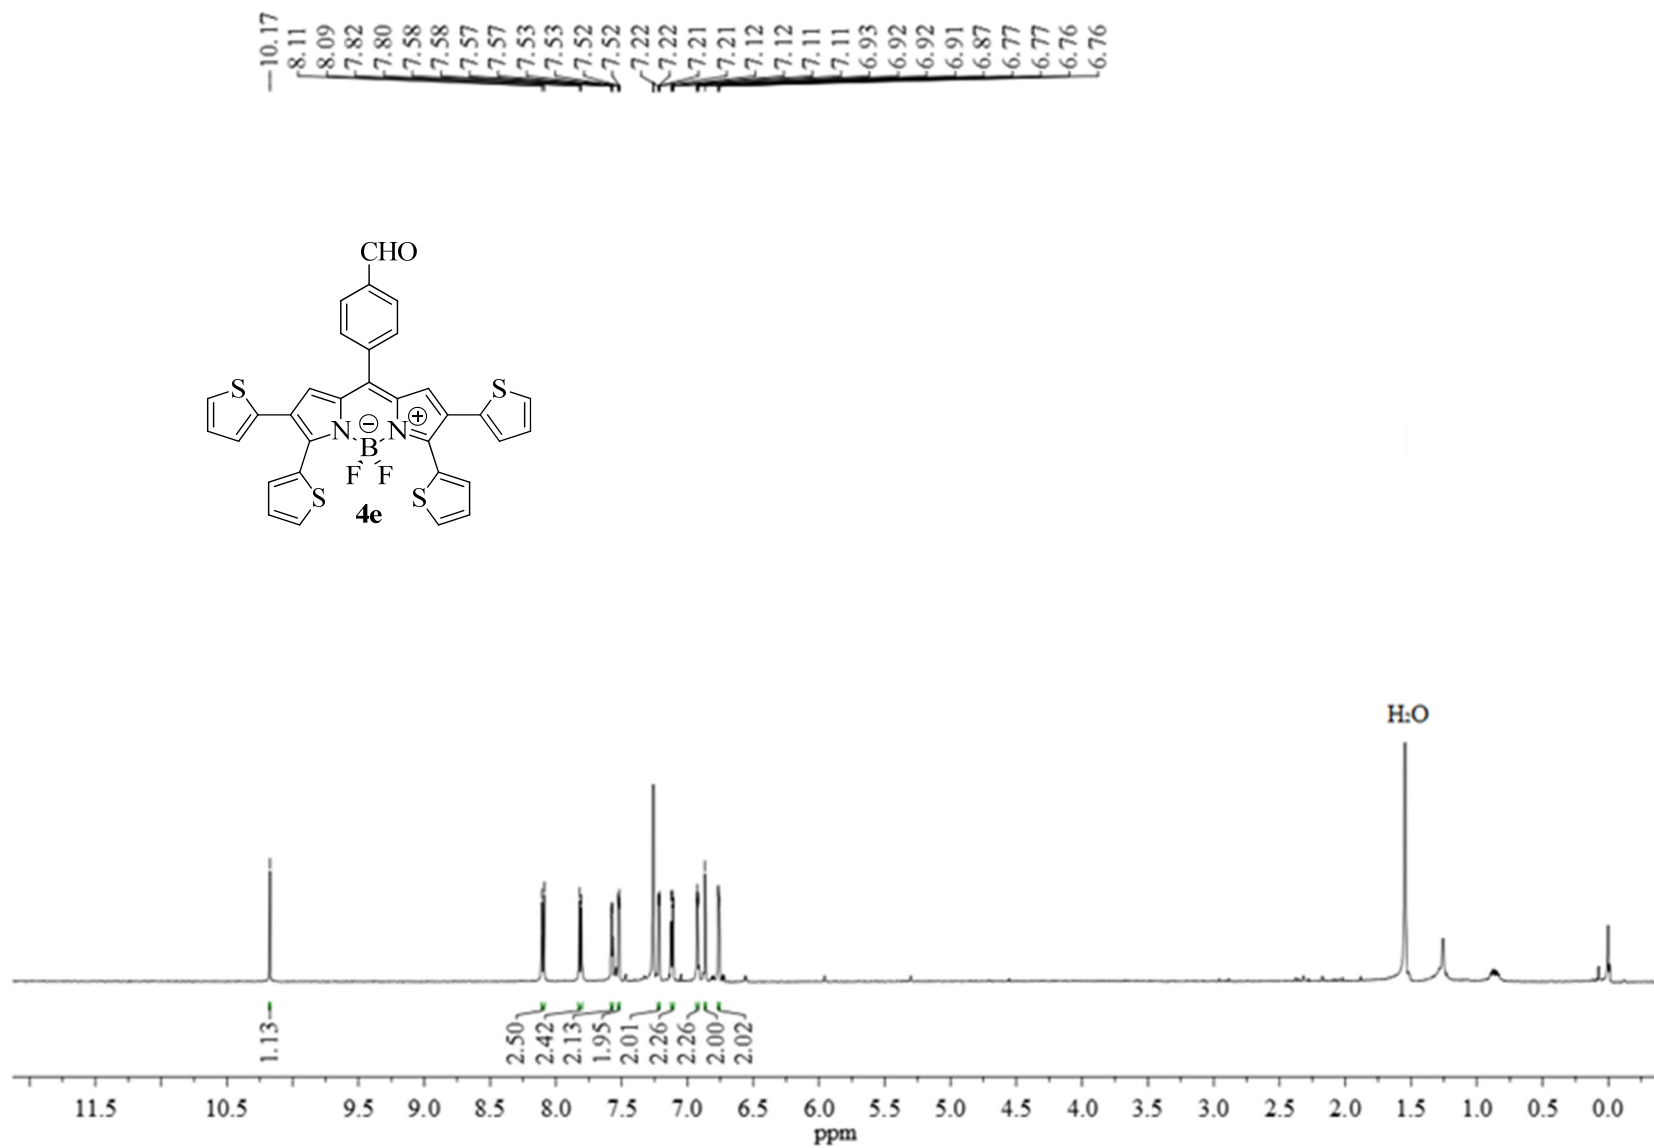

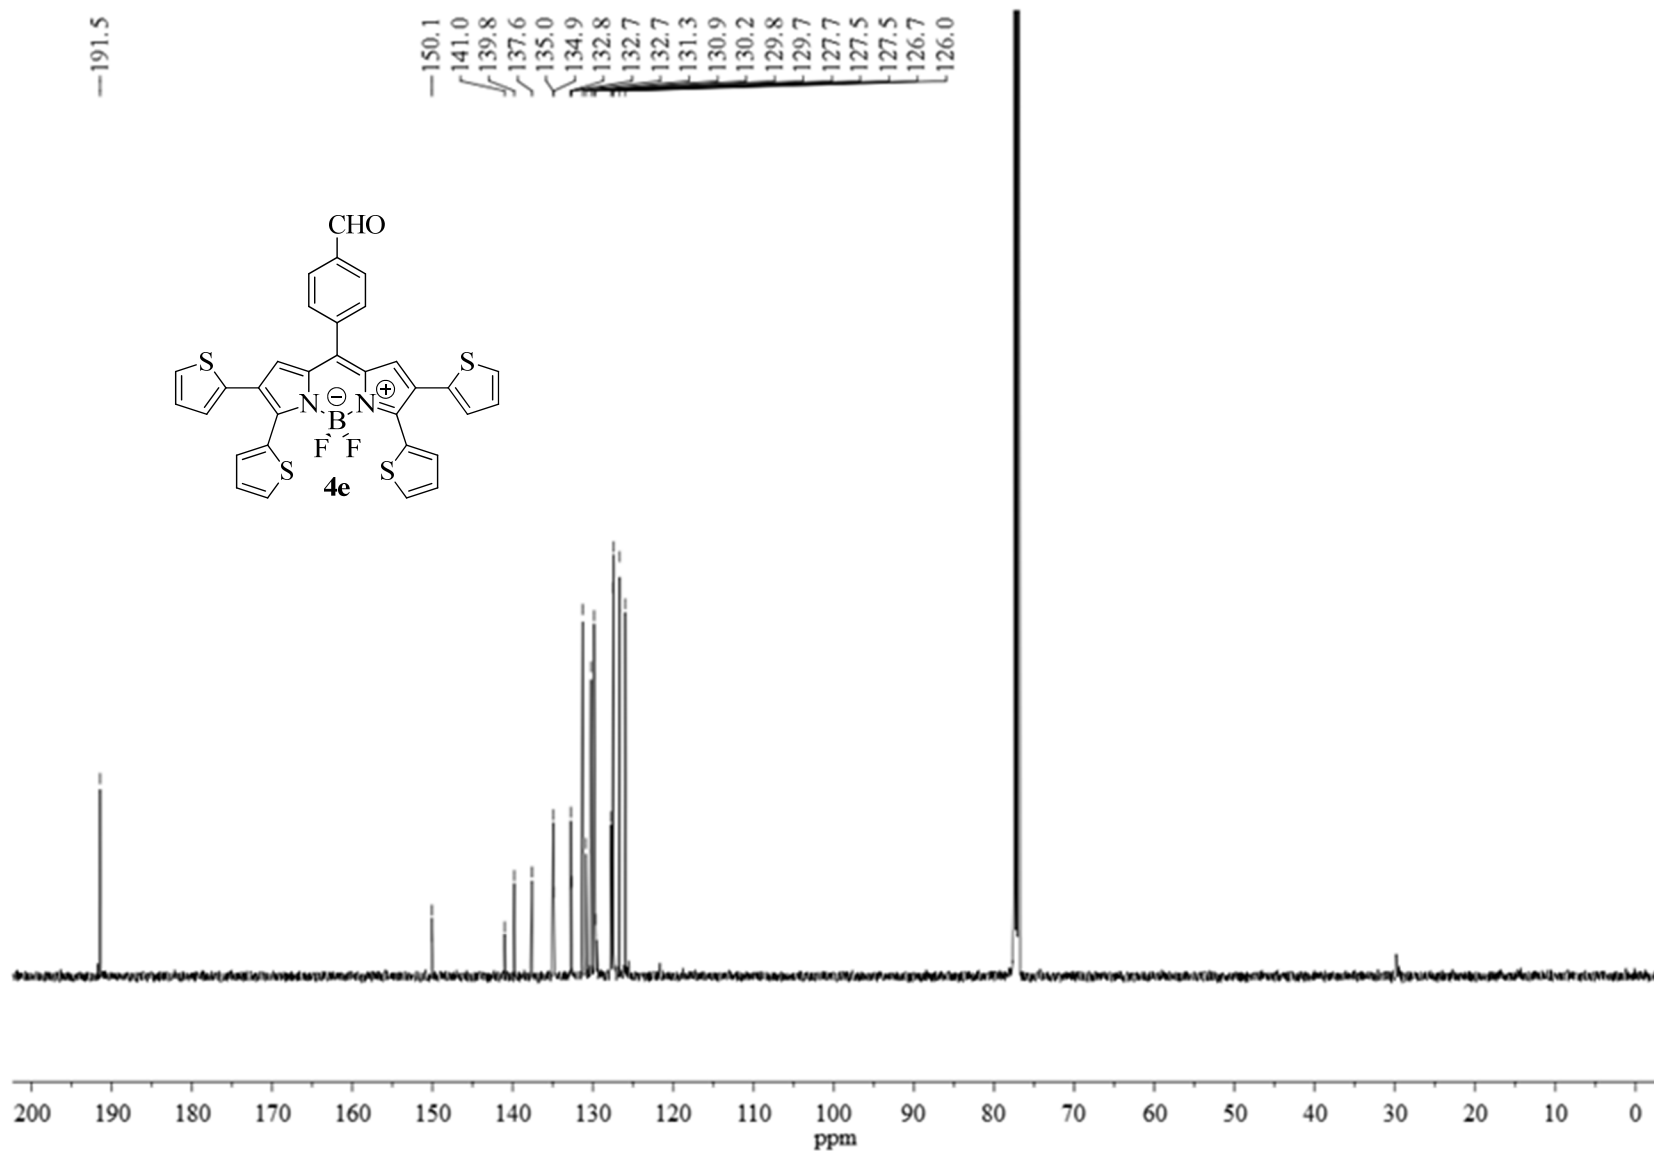

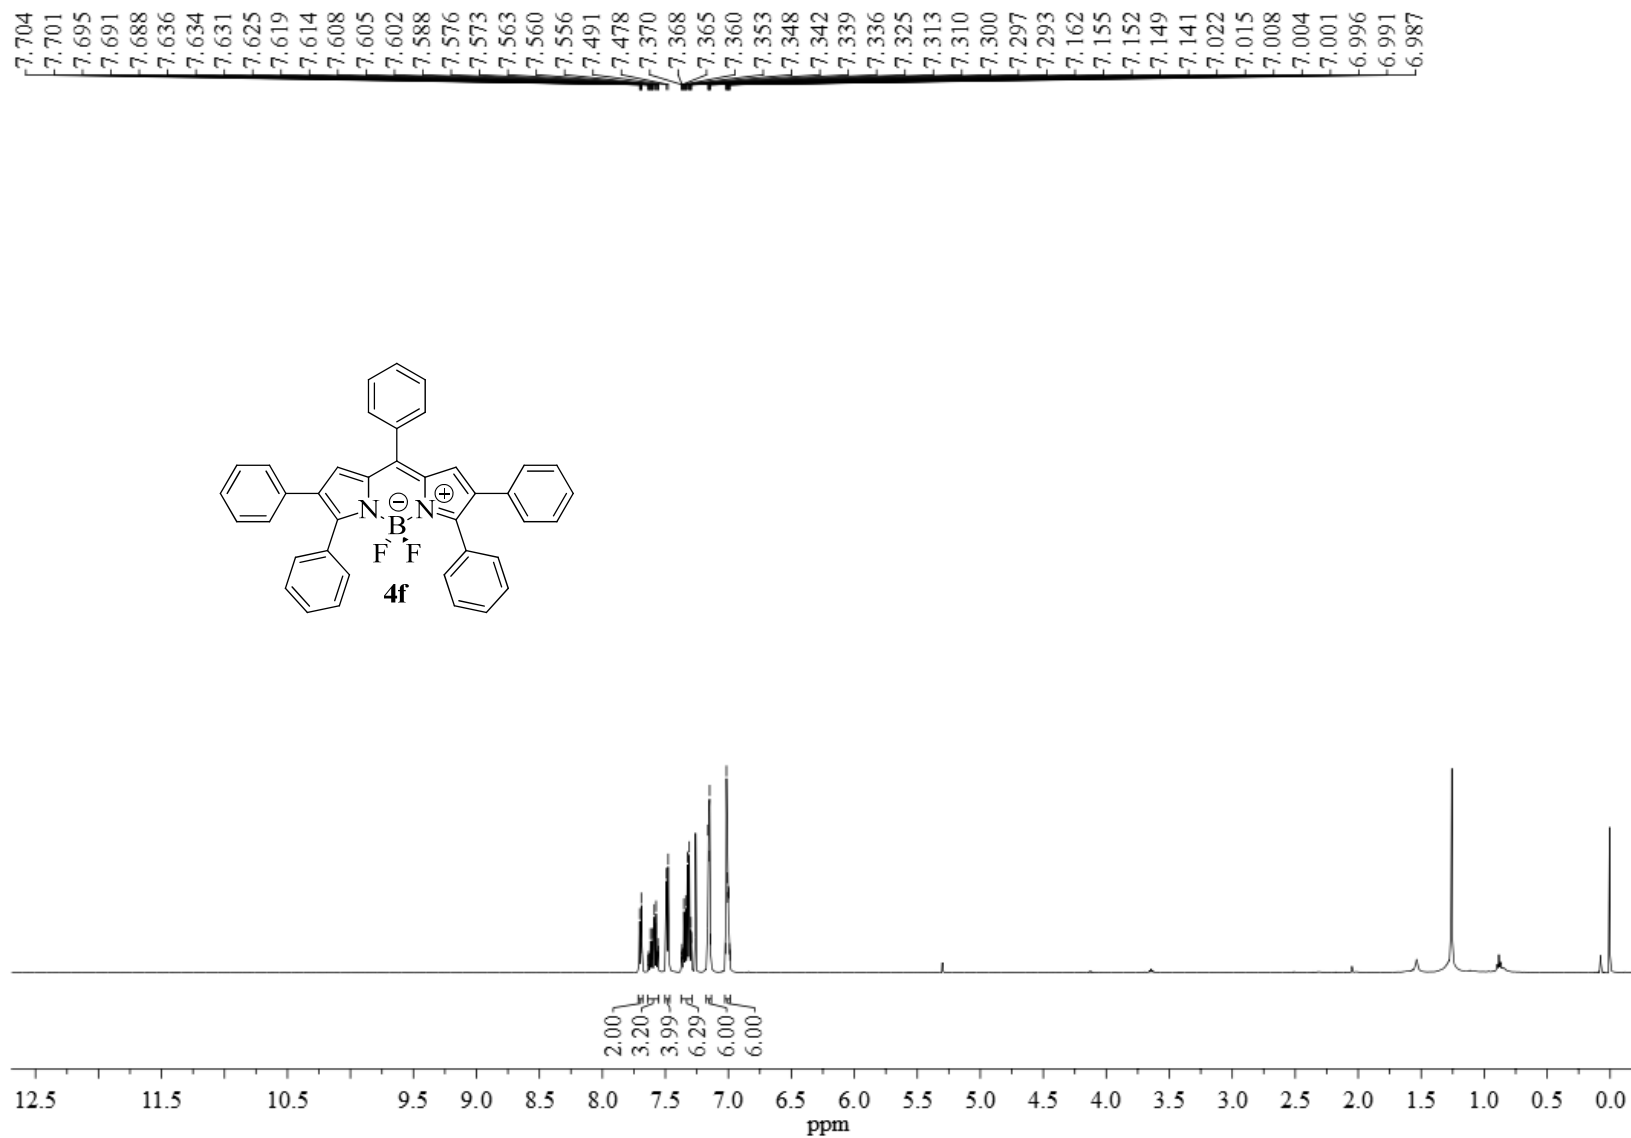

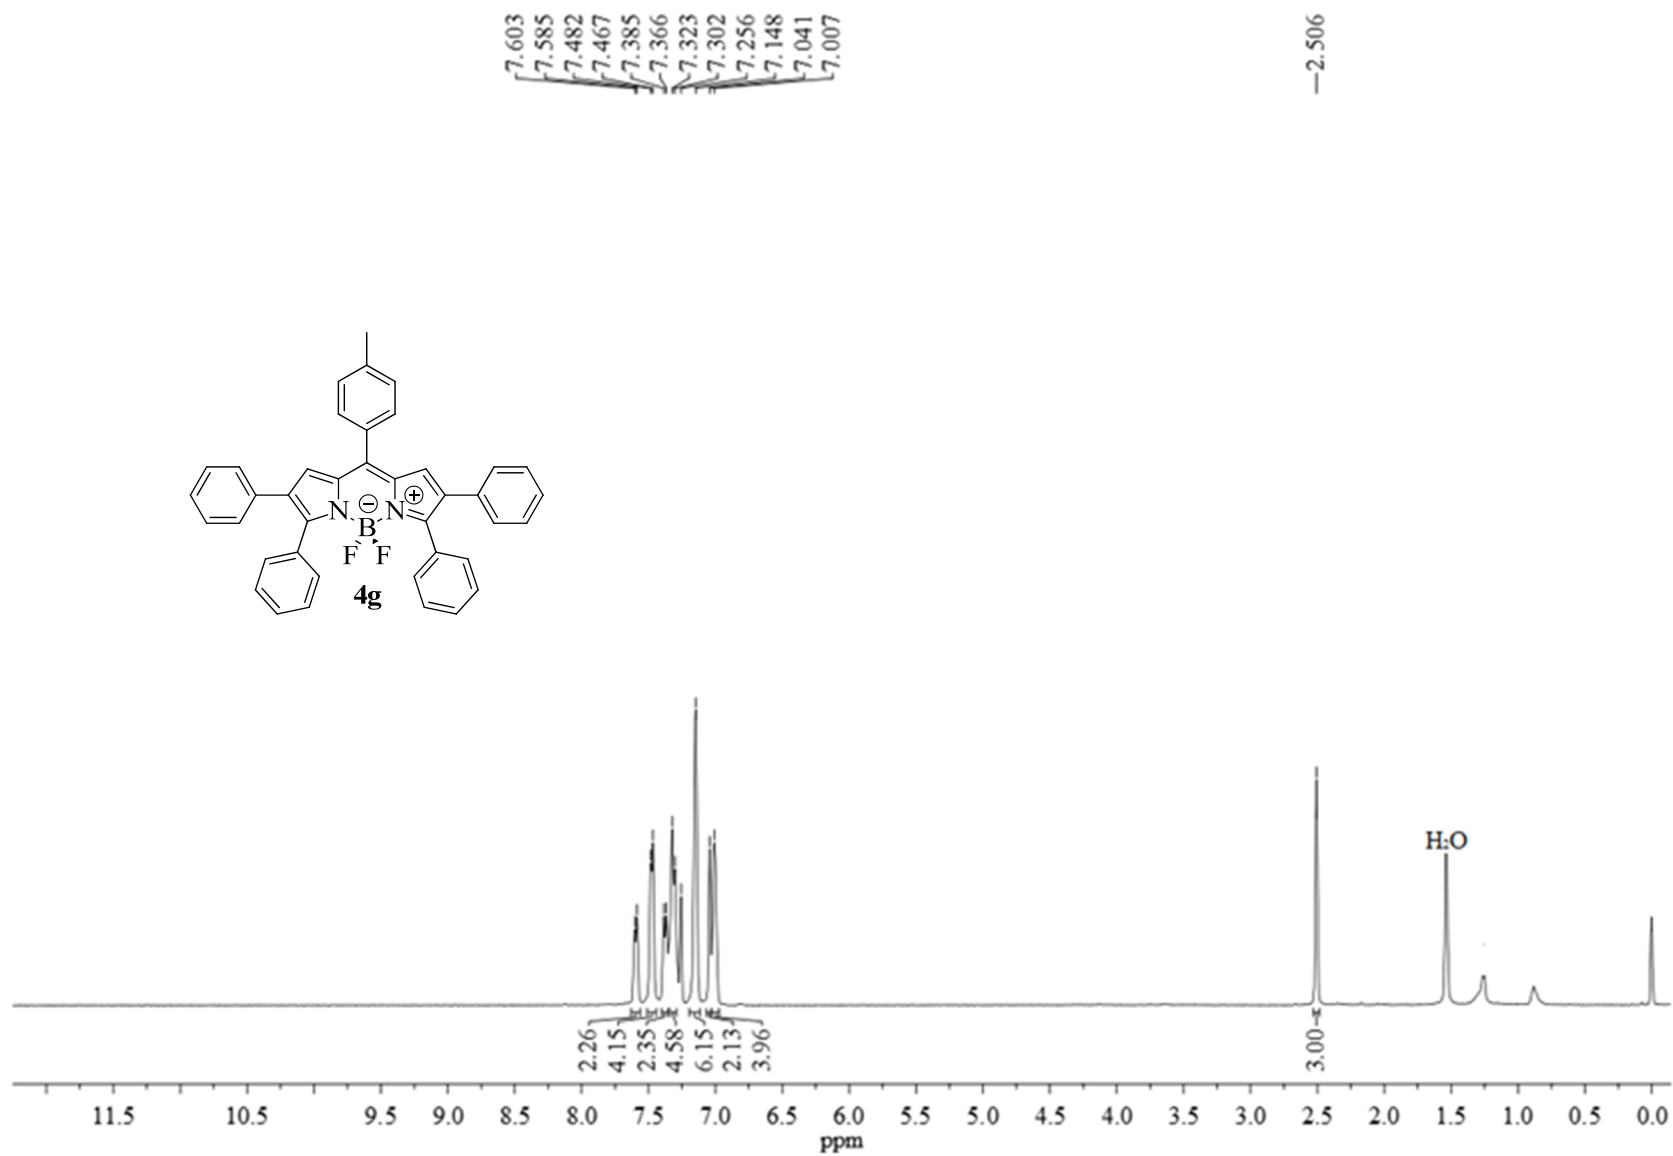

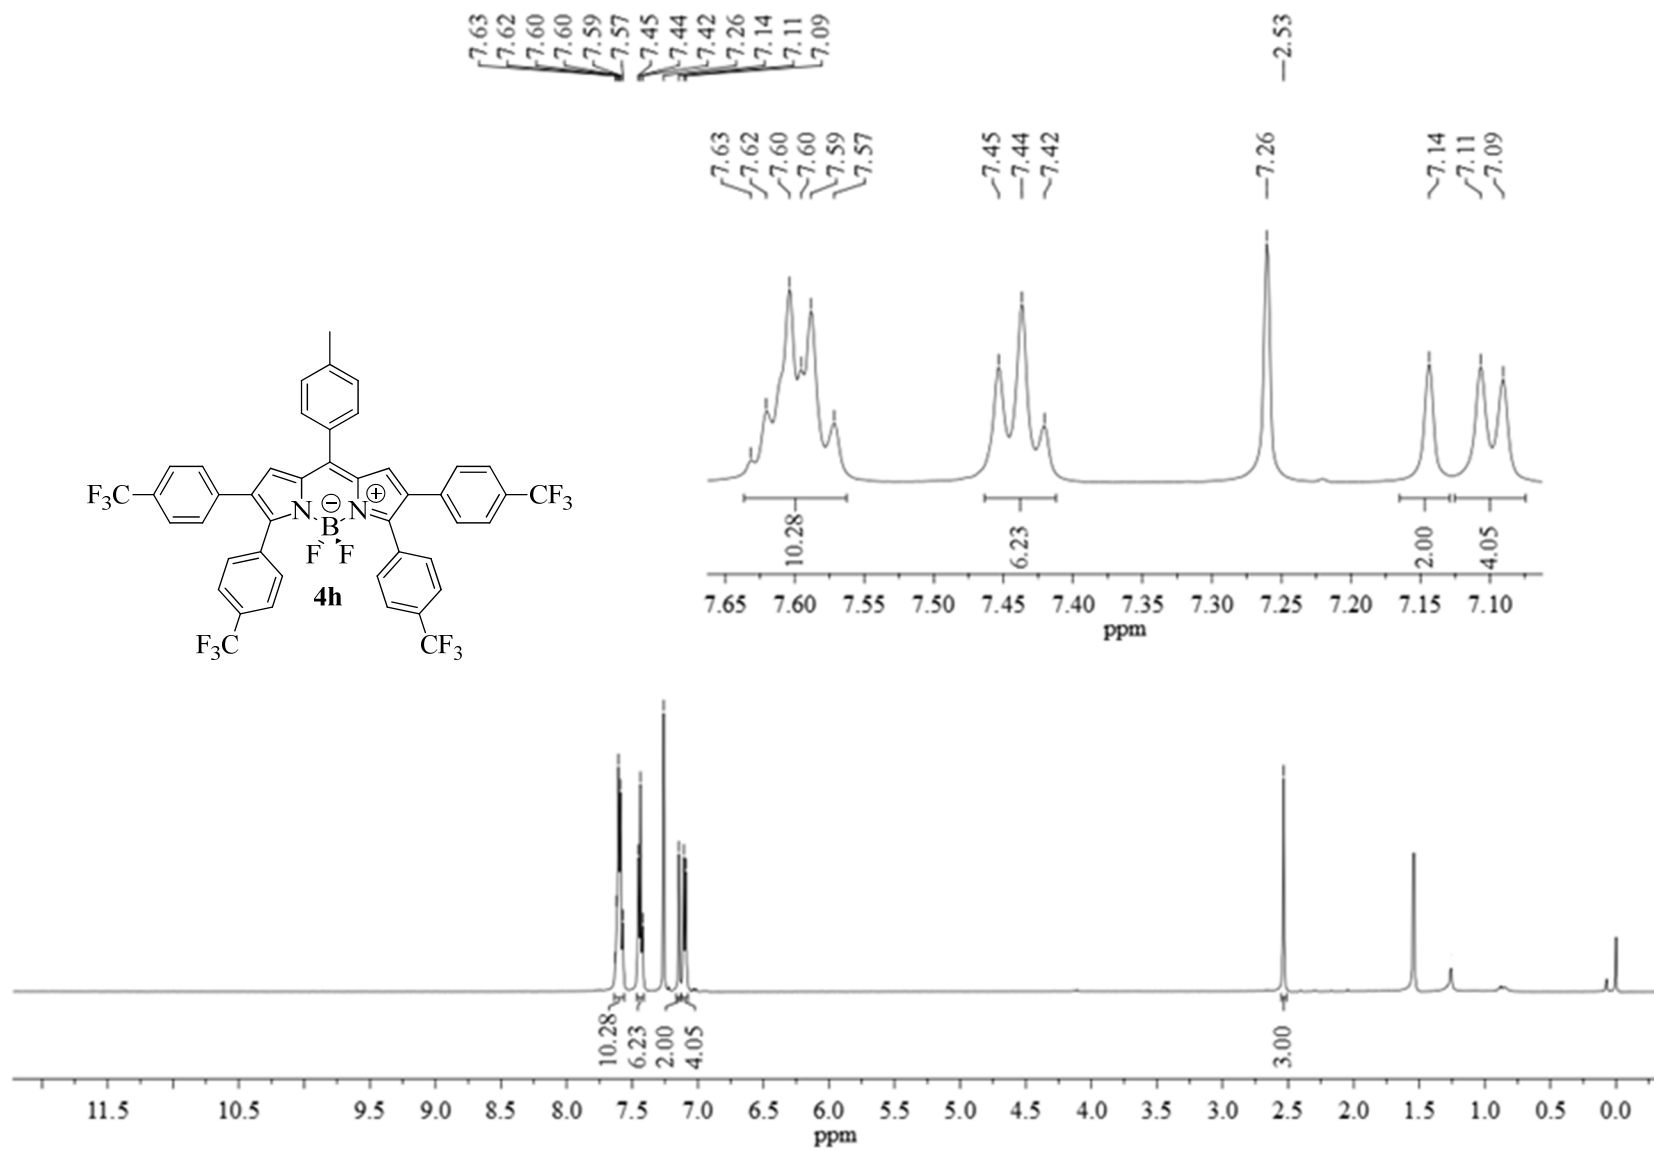

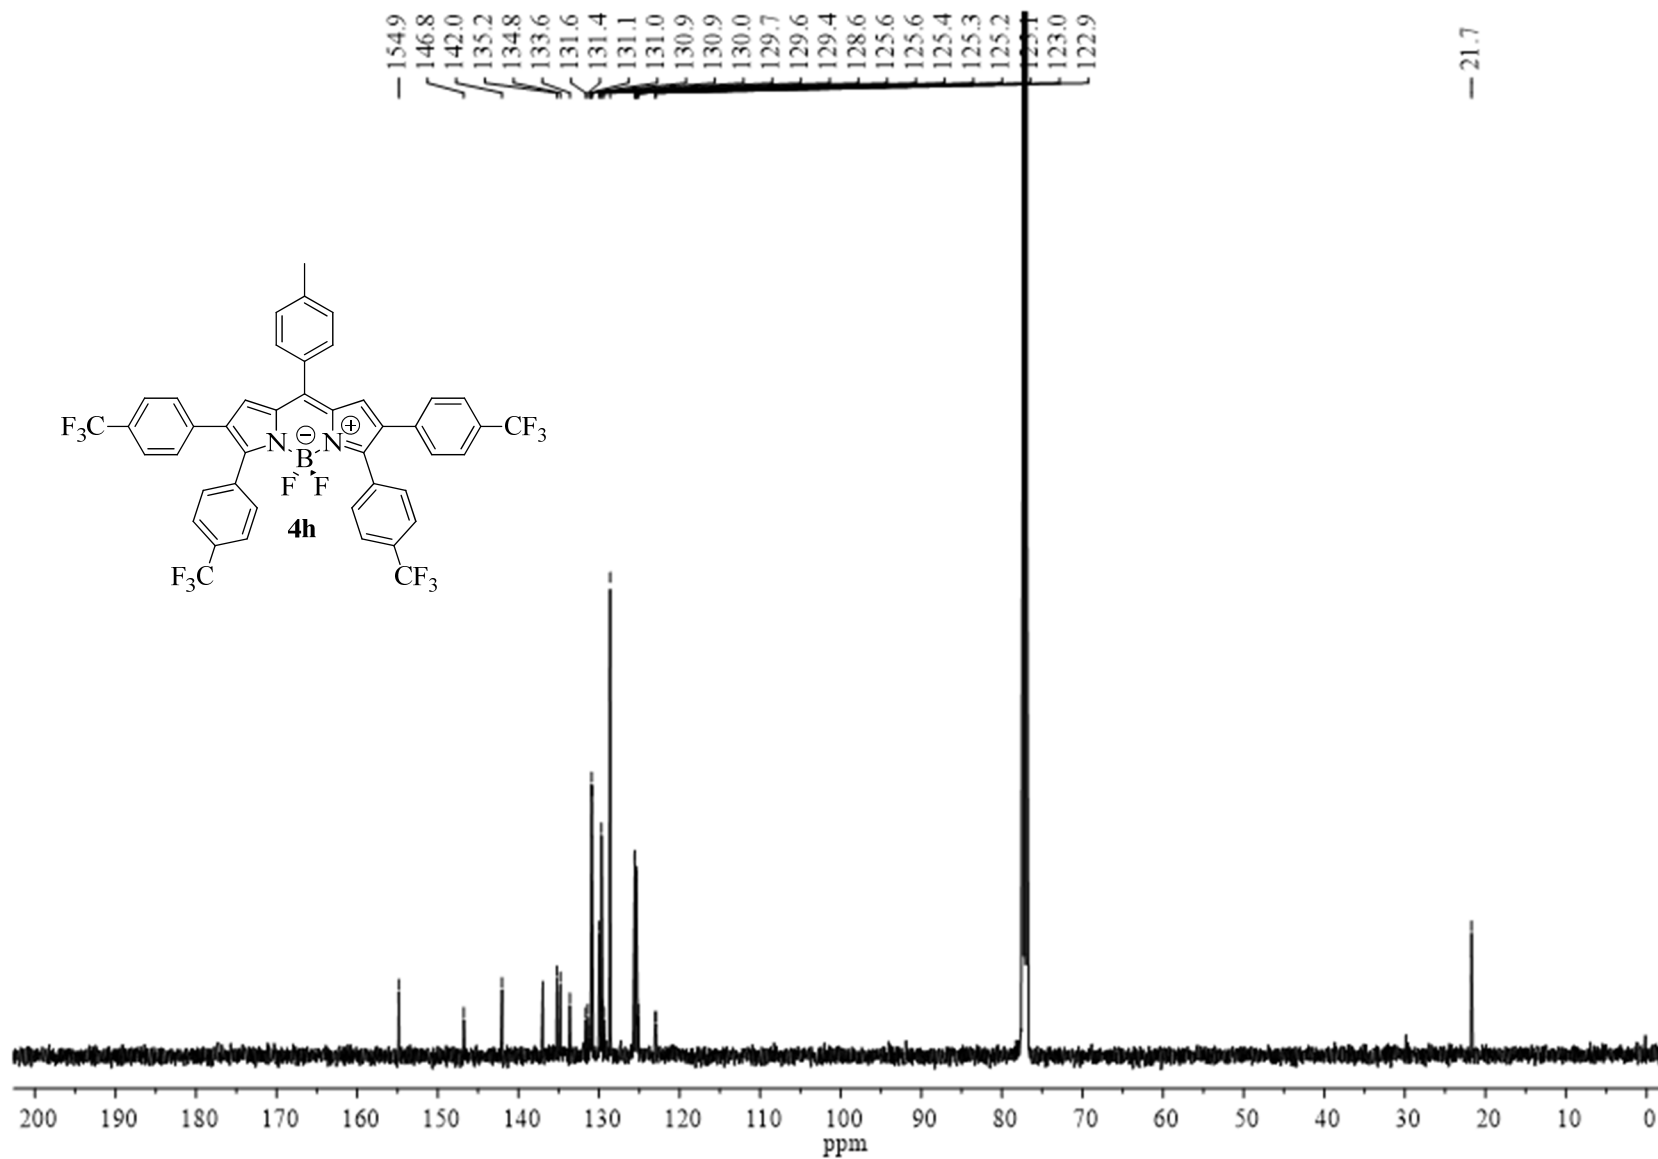

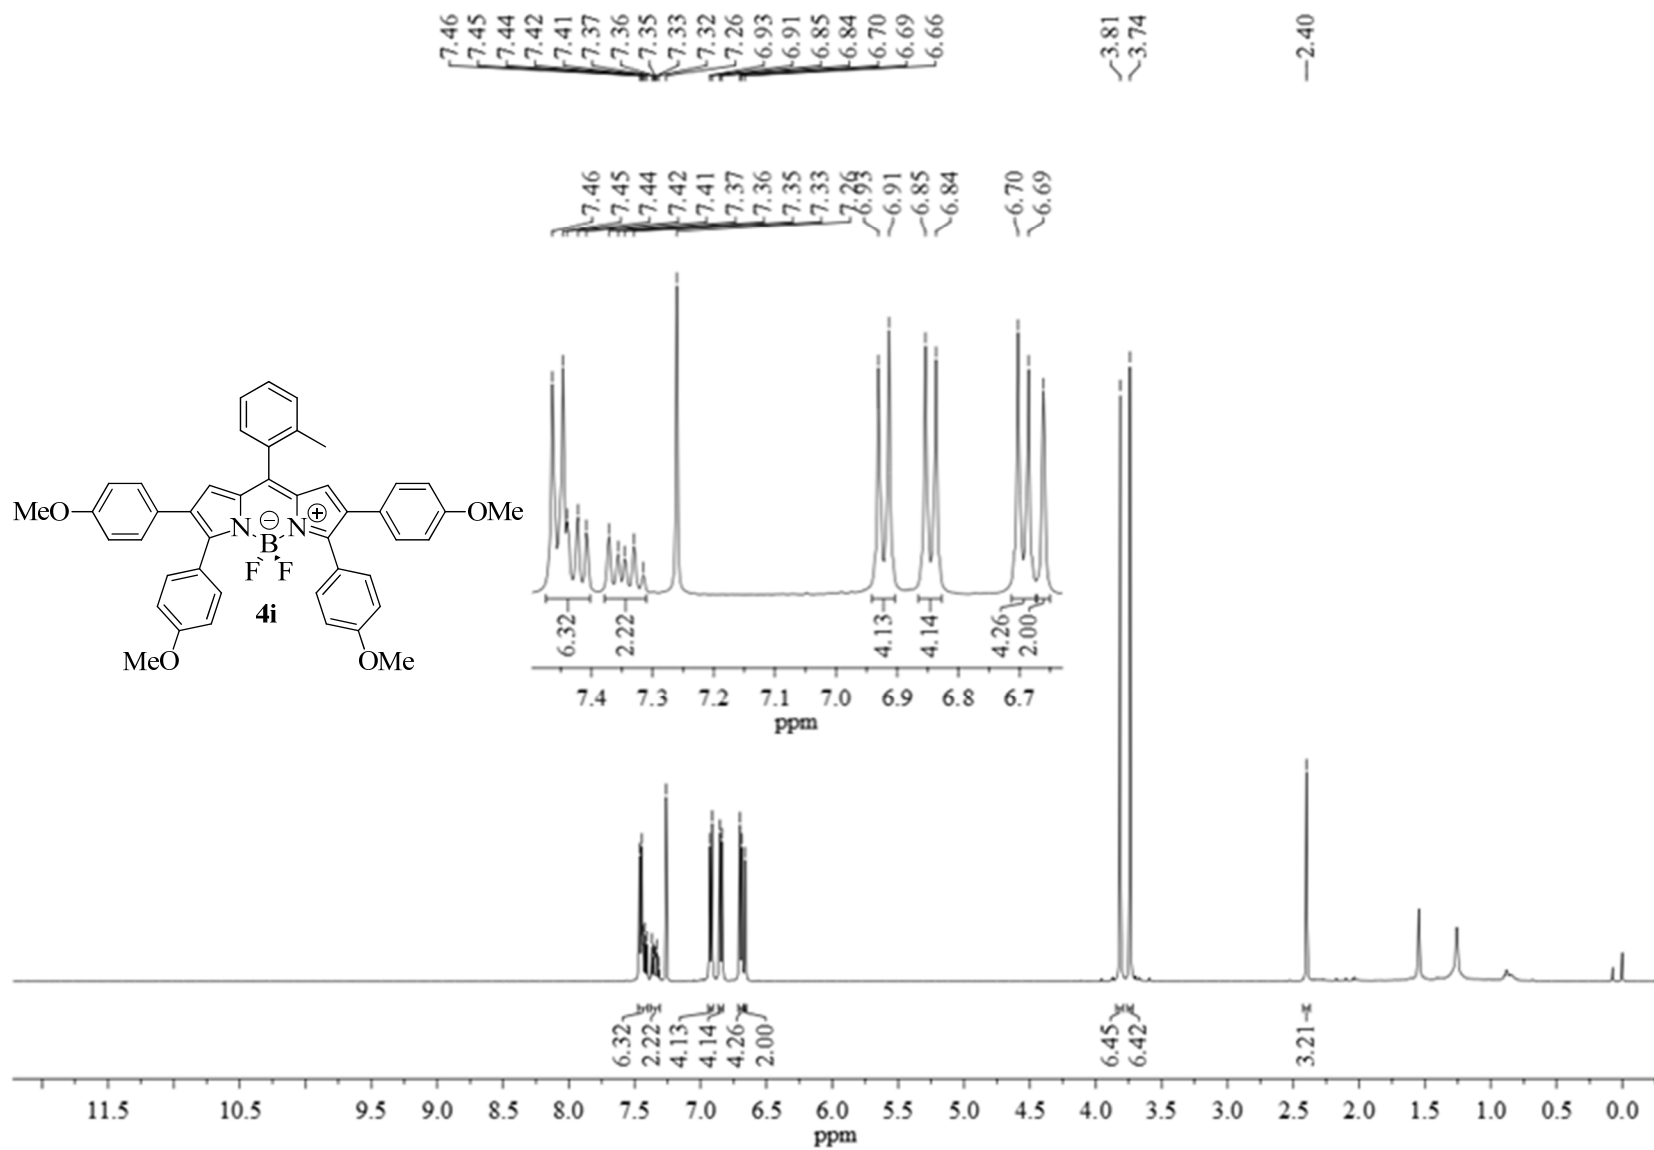

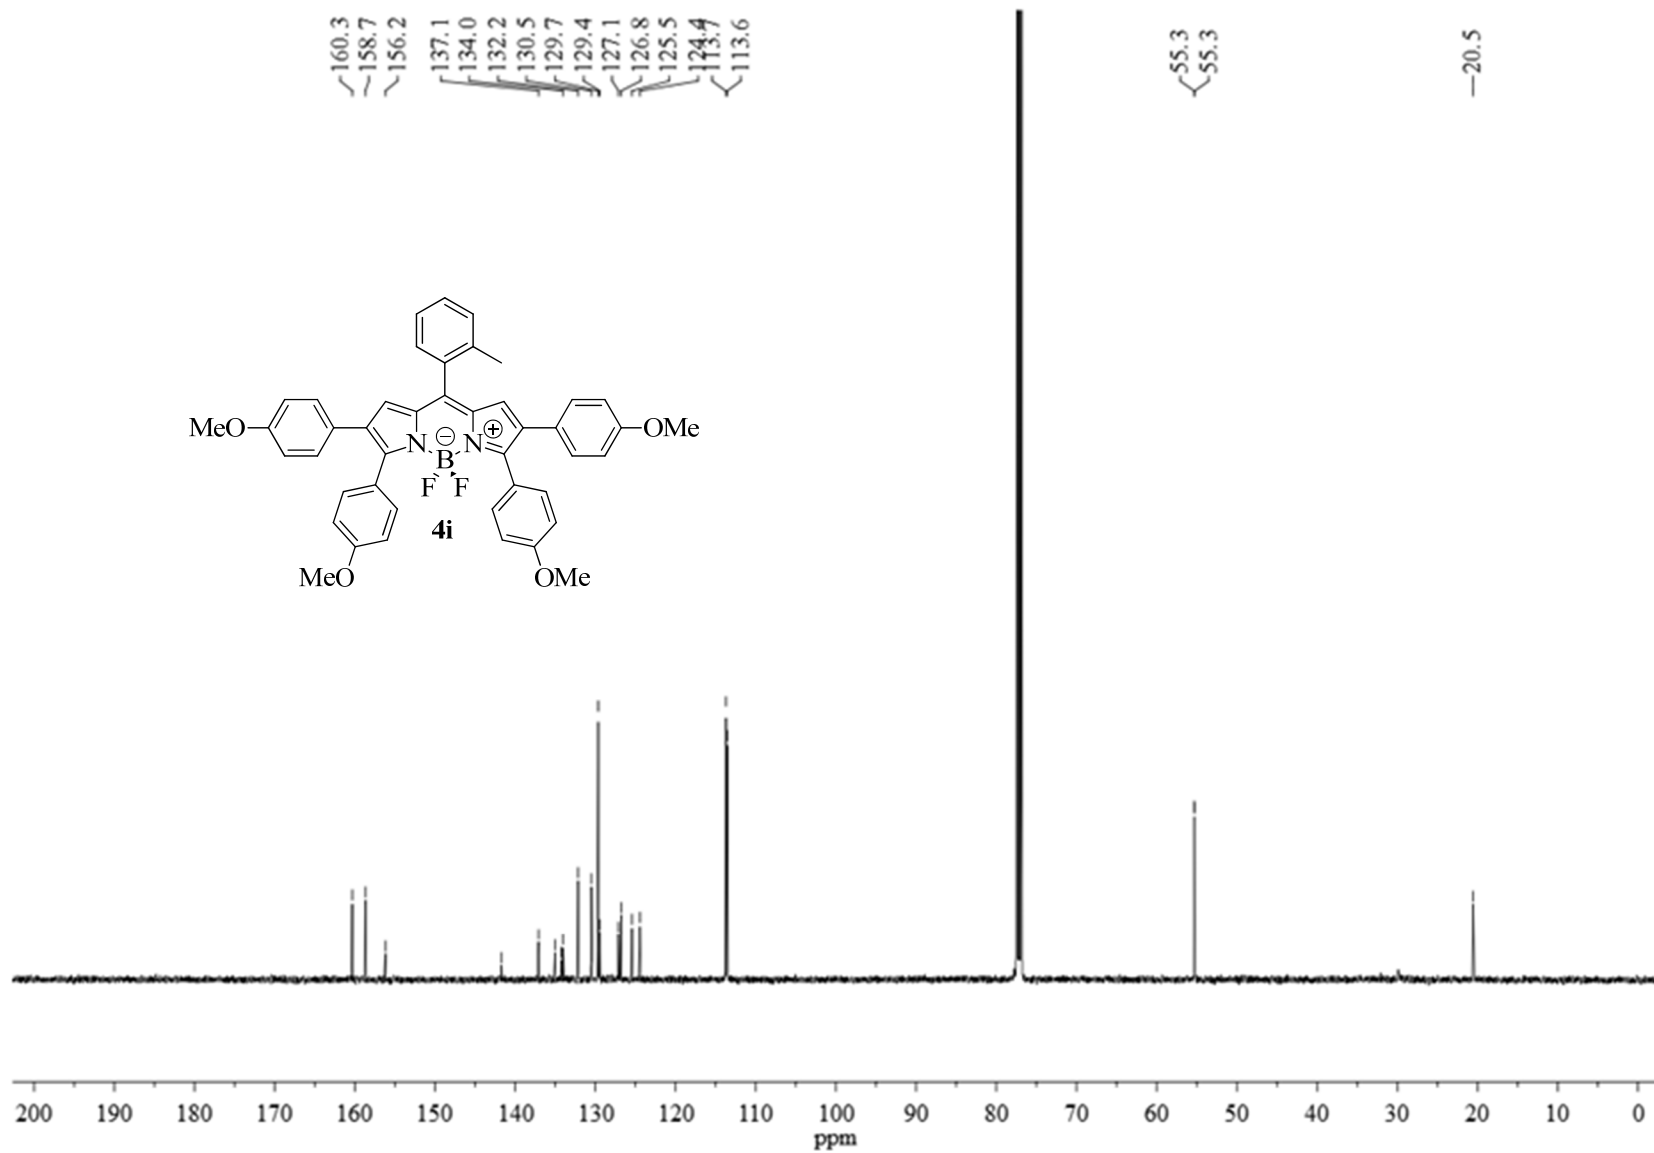



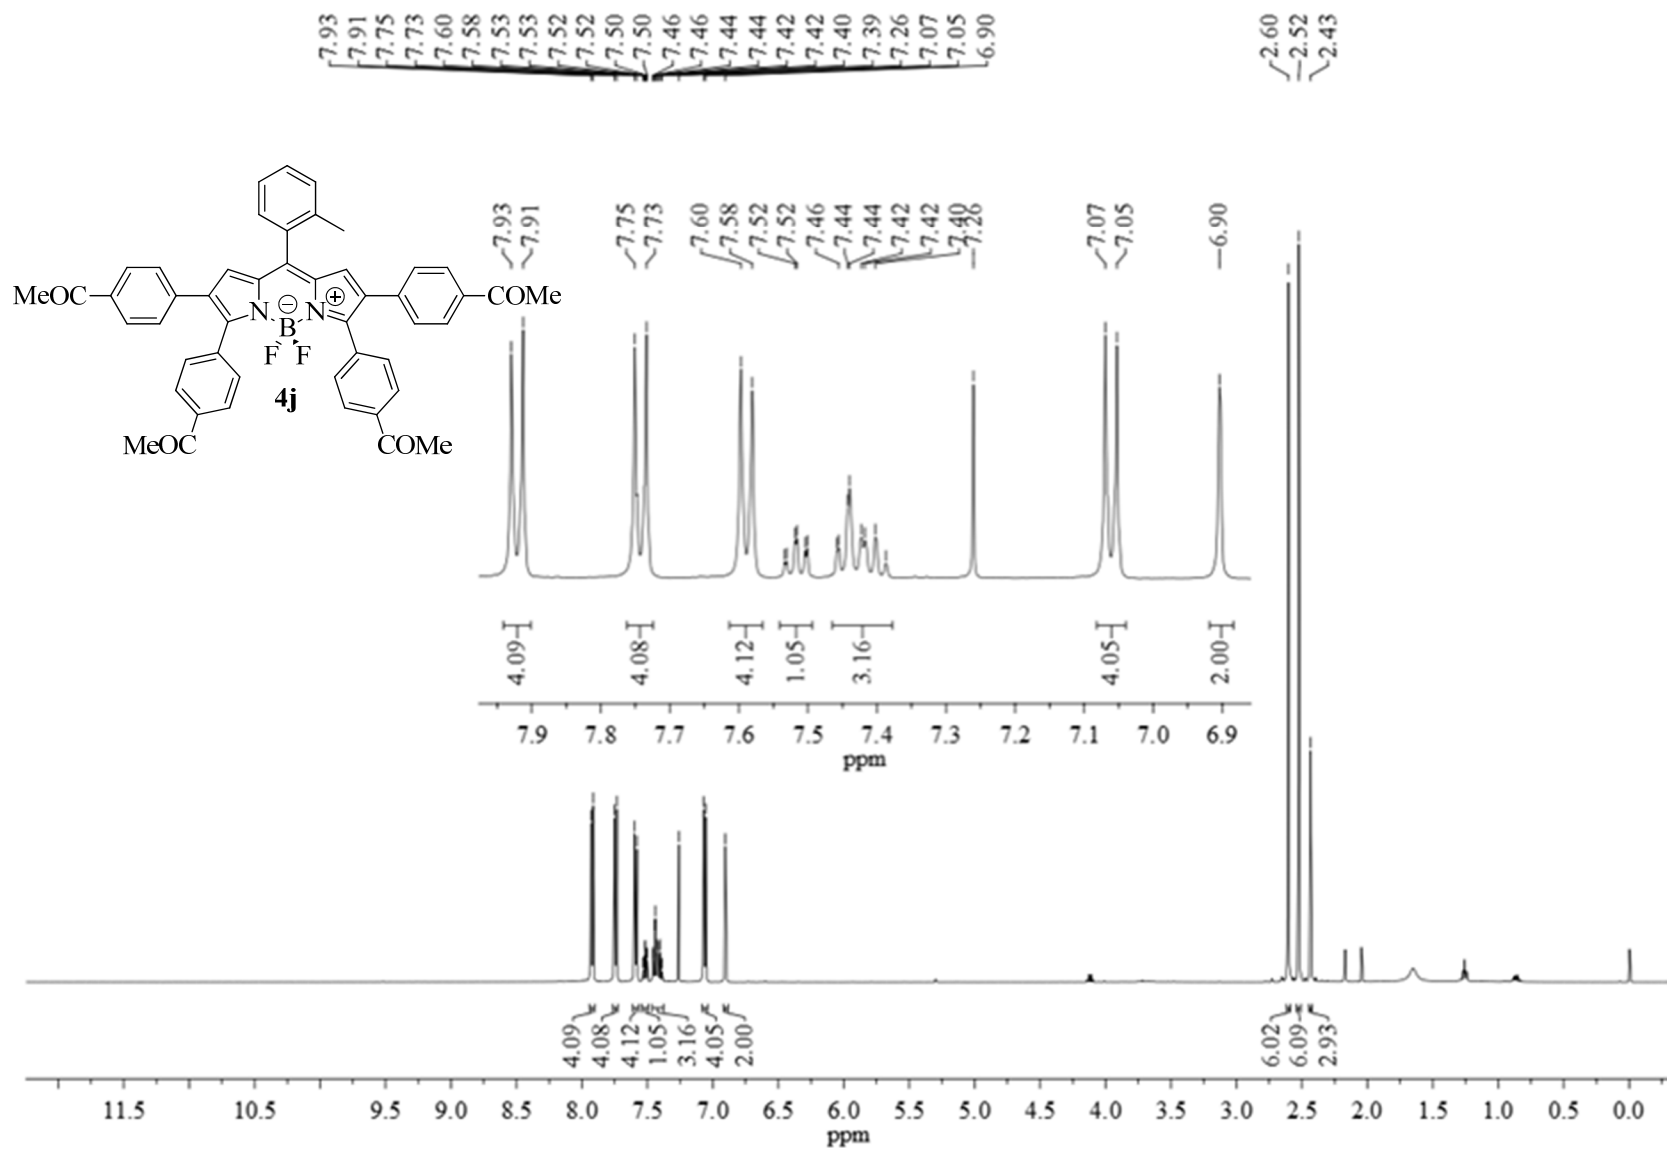

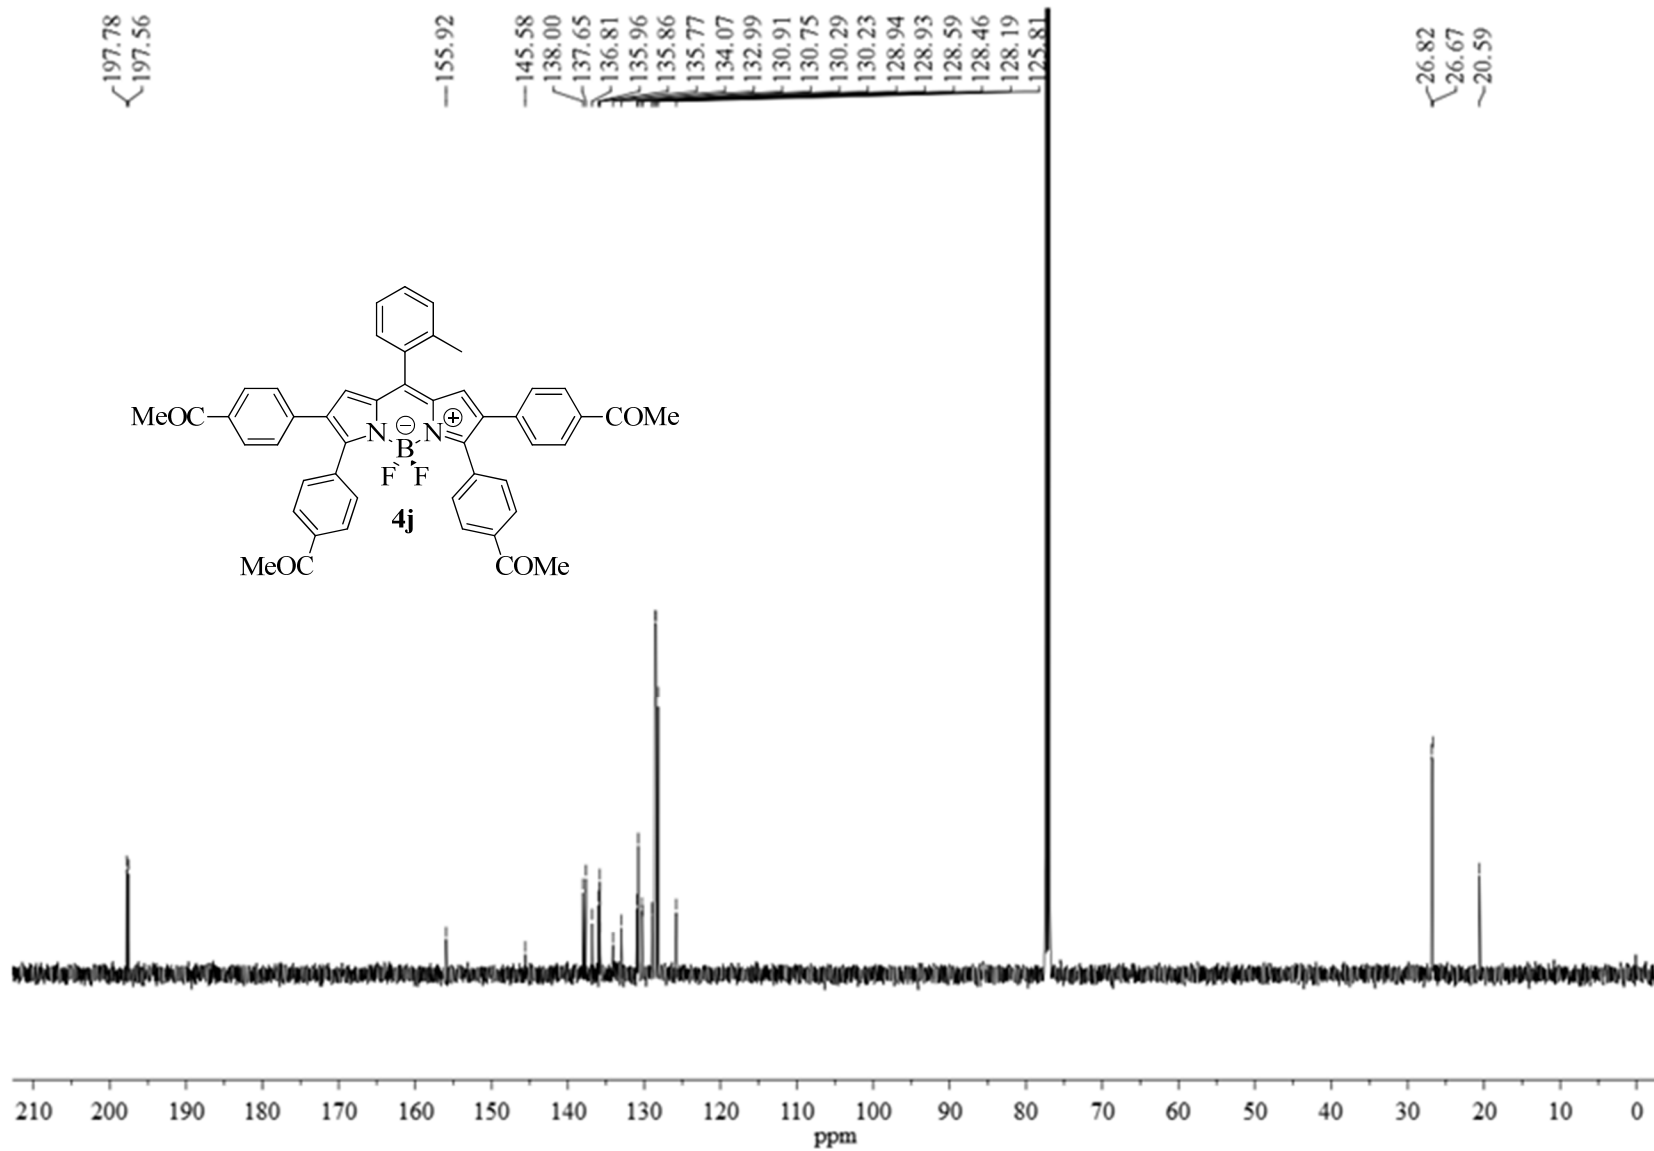

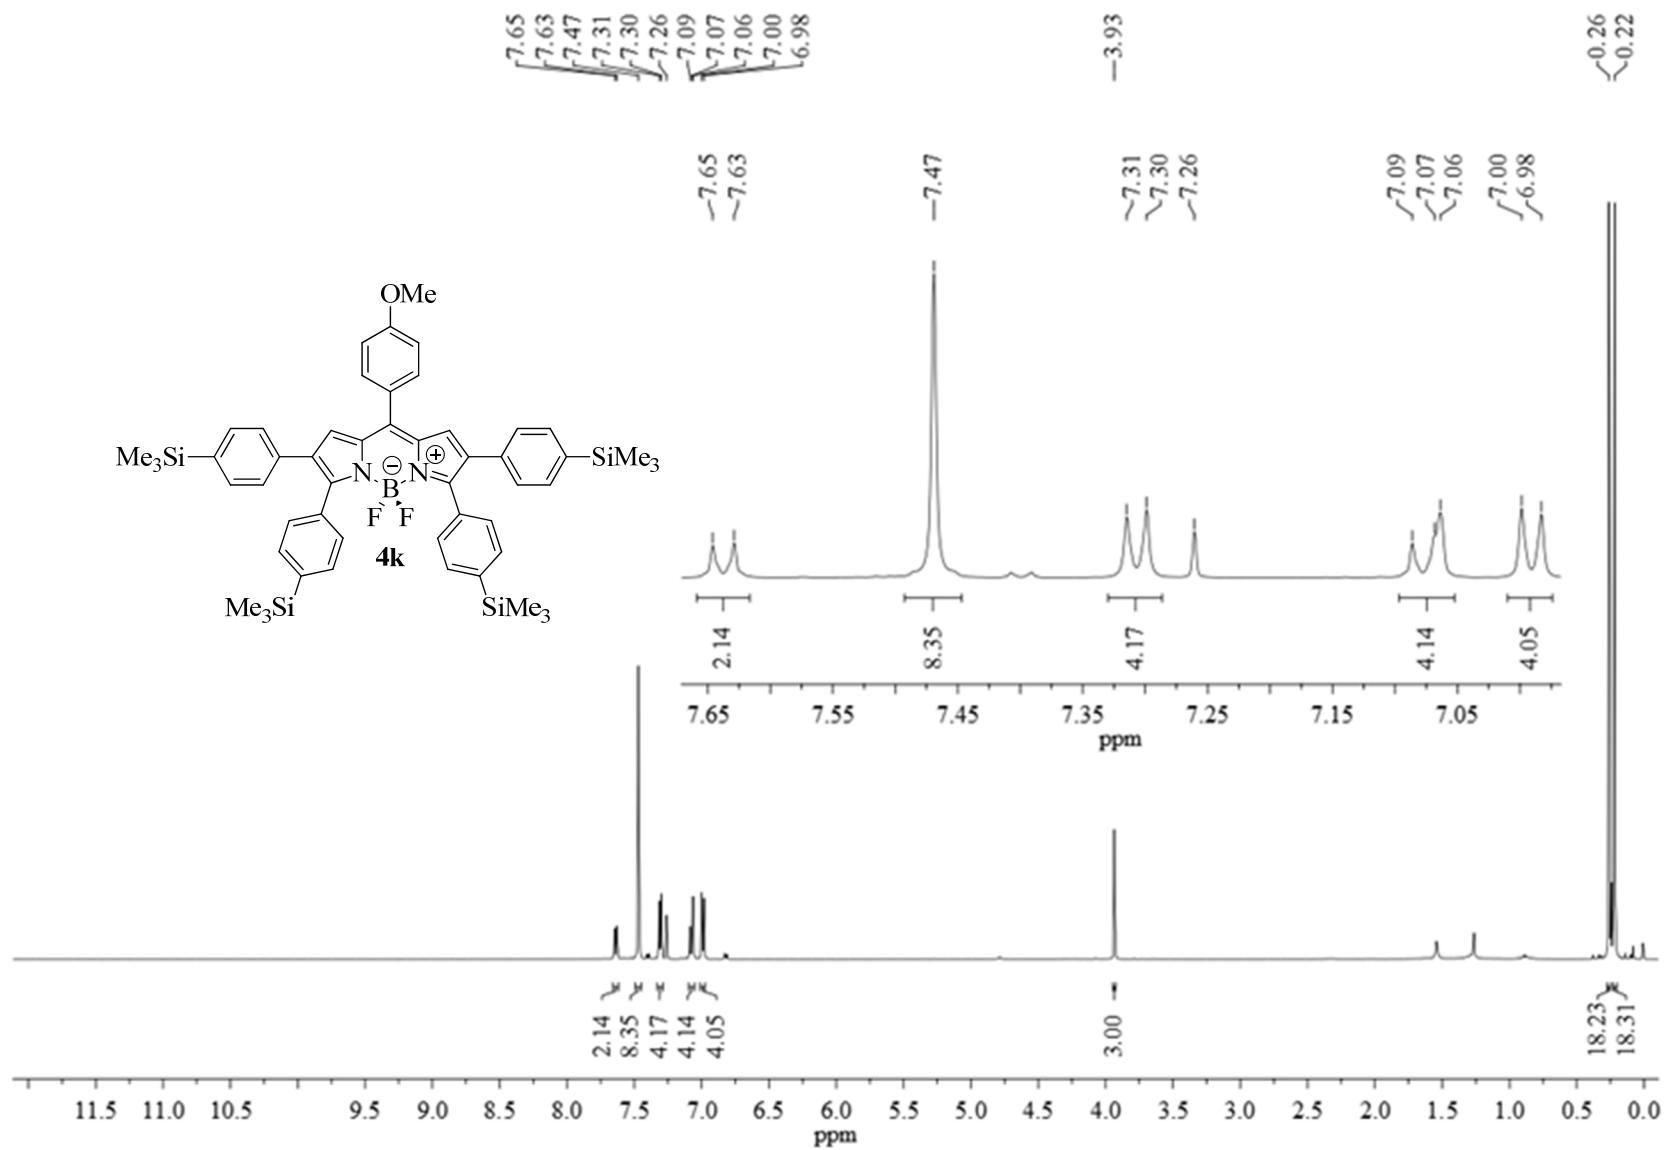

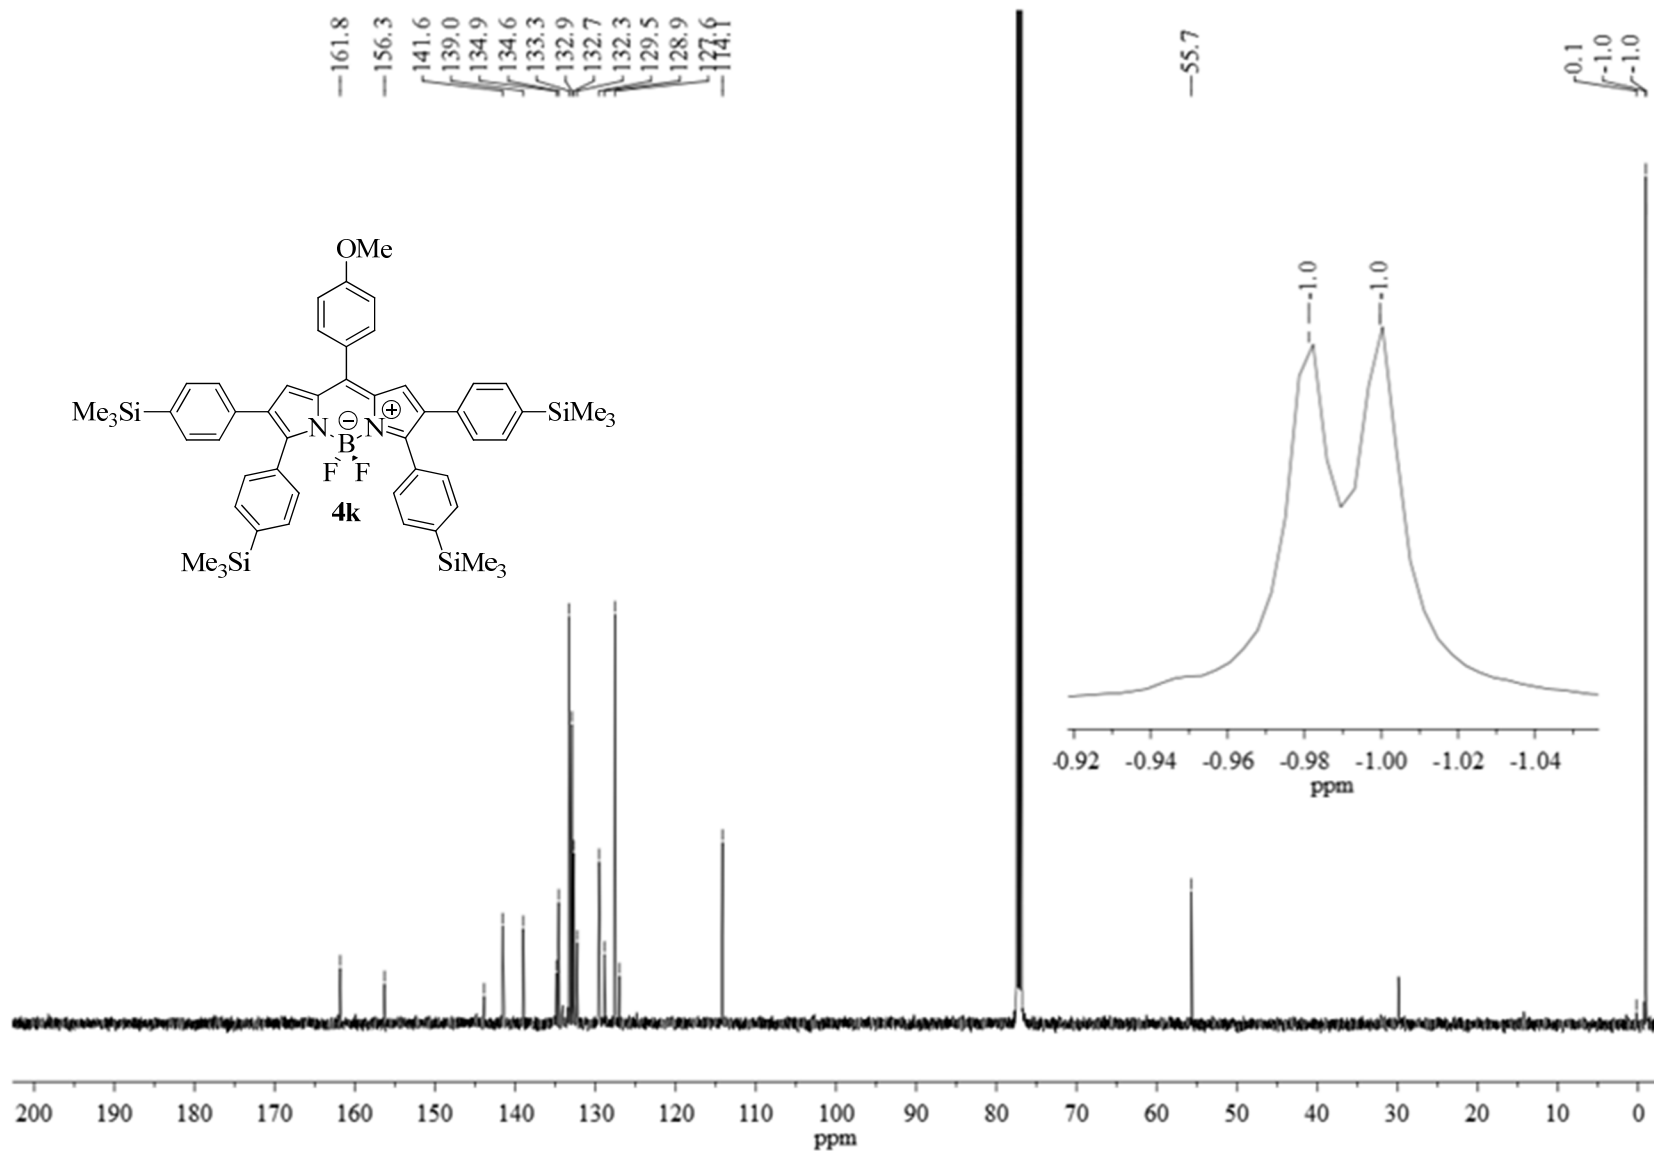

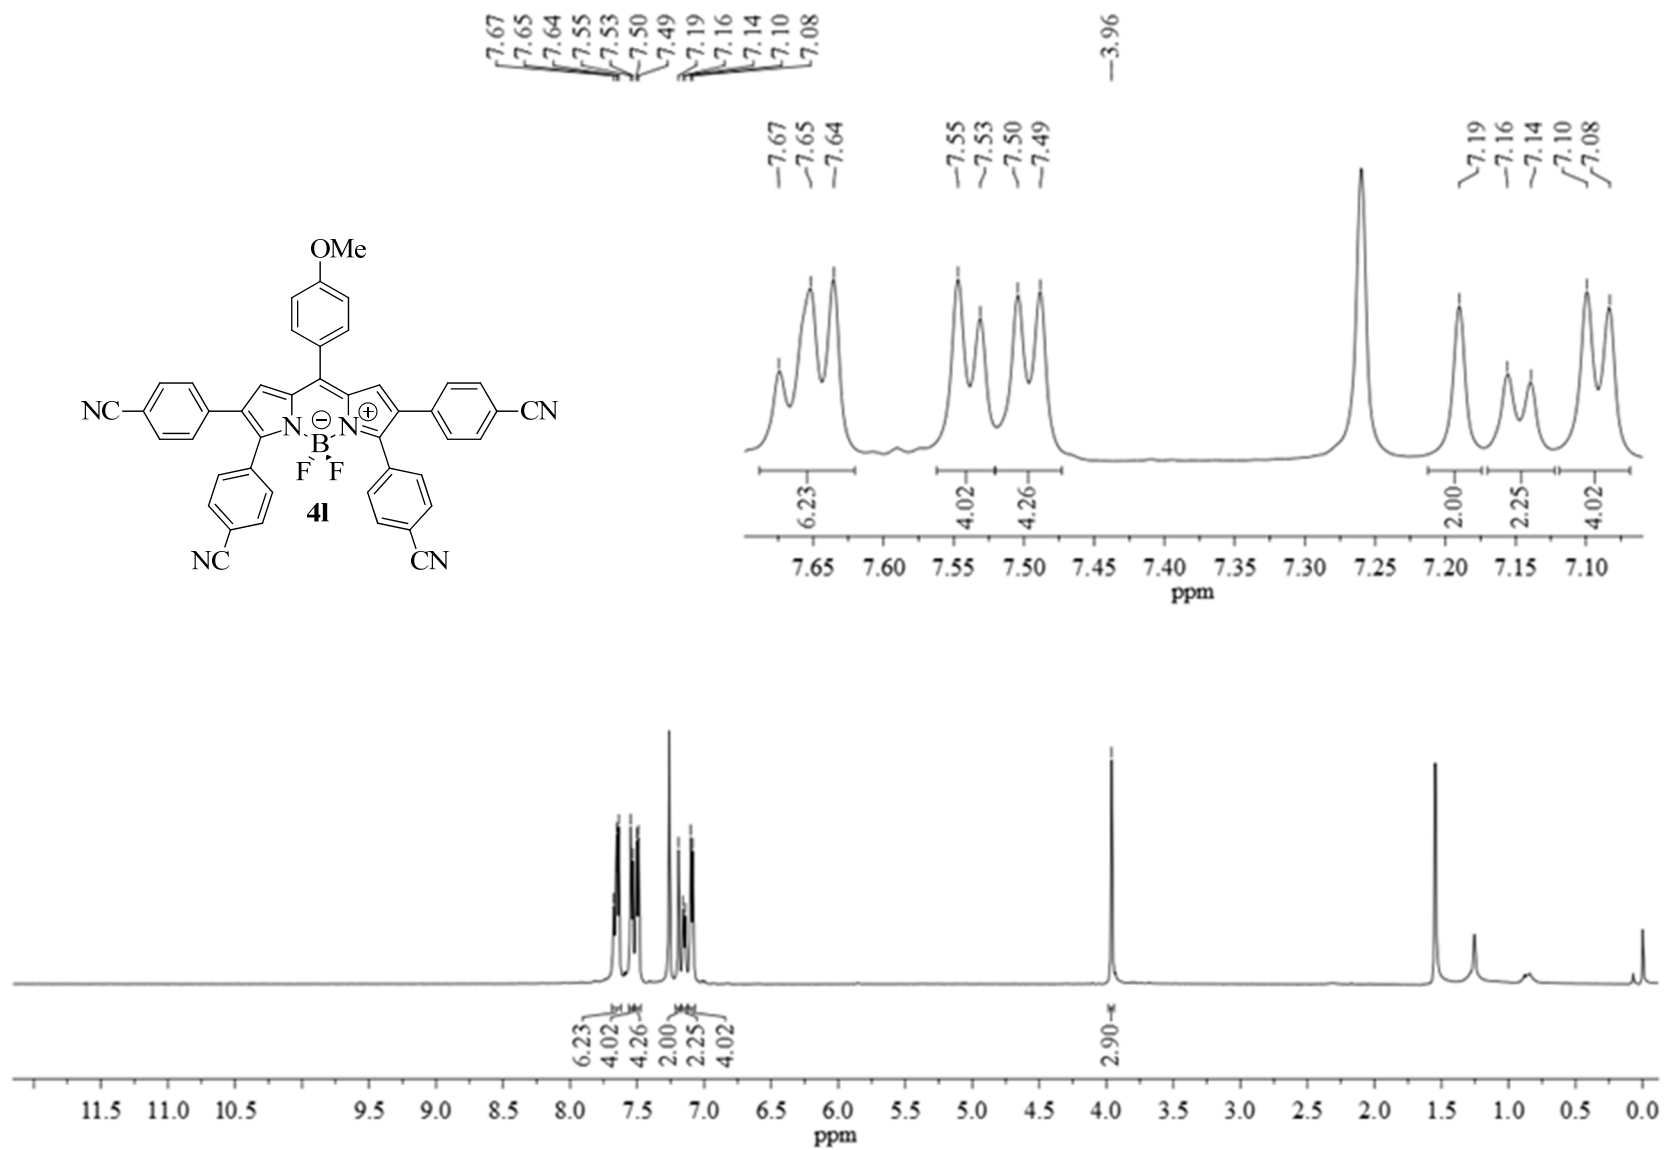

Supplement: s1 [file s1]
